# Supplementary material
Source: publisher figshare collection journal article supplement (https://gsapubs.figshare.com/ndownloader/files/24711653)
Supplement: Supplementary file 1 [file 24711653]

## Sheet: Data
Table S1. Zircon U-Pb geochronologic analyses.
							Isotope ratios						Apparent ages (Ma)
Analysis	U	206Pb	U/Th	206Pb*	±	207Pb*	±	206Pb*	±	error	206Pb*	±	207Pb*	±	206Pb*	±	Best age	±
	ppm	204Pb		207Pb*	(%)	235U*	(%)	238U	(%)	corr.	238U*	Ma	235U	Ma	207Pb*	Ma	Ma	Ma
11 CAT 03 Element 2
11CAT03 Spot 299	409.154	2670.7	1.90882	23.3486	4.62161	0.0404203	4.85162	0.00684776	1.47611	0.304252	43.9931	0.647176	40.2343	1.91385	NA	NA	43.9931	0.647176
11CAT03 Spot 189	727.539	10076.6	2.38362	22.8386	1.73853	0.0429311	2.0881	0.00711425	1.15658	0.55389	45.699	0.526676	42.6818	0.872767	NA	NA	45.699	0.526676
11CAT03 Spot 182	331.574	25110.5	1.91301	21.5216	1.91044	0.0462953	2.26495	0.00722934	1.21664	0.537162	46.4357	0.562926	45.9518	1.01759	20.7775	45.8491	46.4357	0.562926
11CAT03 Spot 91	262.547	3844.35	1.61014	21.9458	2.54804	0.0456162	3.16824	0.00726372	1.88287	0.594296	46.6557	0.875295	45.2926	1.40344	NA	NA	46.6557	0.875295
11CAT03 Spot 277	168.643	12561.2	1.20602	21.4584	2.65838	0.0470983	3.065	0.00733314	1.52553	0.497725	47.1	0.715905	46.7308	1.39984	27.8489	63.7469	47.1	0.715905
11CAT03 Spot 186	491.043	21164.6	1.80334	21.5627	1.8244	0.0470351	2.21375	0.00735888	1.2539	0.566414	47.2647	0.590484	46.6695	1.00976	16.1976	43.8431	47.2647	0.590484
11CAT03 Spot 294	197.808	105001	2.59987	21.977	2.42604	0.0462777	2.67946	0.00737951	1.13747	0.424516	47.3967	0.537148	45.9347	1.20338	NA	NA	47.3967	0.537148
11CAT03 Spot 131	176.16	13532.4	3.14438	21.2575	2.91703	0.0483128	3.52893	0.00745181	1.98603	0.562785	47.8594	0.946981	47.9078	1.65137	50.3292	69.6491	47.8594	0.946981
11CAT03 Spot 74	593.133	6343.78	1.29324	19.912	3.25002	0.0516362	3.51465	0.00746031	1.33795	0.380678	47.9137	0.638685	51.1218	1.75227	204.247	75.4371	47.9137	0.638685
11CAT03 Spot 113	345.582	5608.42	2.49006	23.0282	2.19595	0.0446671	2.50529	0.0074634	1.20593	0.481352	47.9335	0.575899	44.3705	1.08767	NA	NA	47.9335	0.575899
11CAT03 Spot 19	213.581	4587.86	4.25727	23.0419	4.07502	0.0446471	4.23806	0.00746446	1.16417	0.274694	47.9403	0.556036	44.351	1.83917	NA	NA	47.9403	0.556036
11CAT03 Spot 50	291.037	2946.8	2.36056	22.6162	6.07795	0.0455241	6.30097	0.0074705	1.66155	0.263698	47.9789	0.794236	45.2031	2.78577	NA	NA	47.9789	0.794236
11CAT03 Spot 52	221.025	5735.84	2.60938	24.4003	3.25157	0.0422146	3.68332	0.00747386	1.73036	0.469782	48.0004	0.827495	41.9839	1.51487	NA	NA	48.0004	0.827495
11CAT03 Spot 180	361.5	42791.6	2.93228	21.546	2.17801	0.047842	2.57878	0.00747936	1.38073	0.535418	48.0356	0.660776	47.4517	1.19553	18.0218	52.3114	48.0356	0.660776
11CAT03 Spot 201	454.687	10618.9	1.90795	21.8307	2.14534	0.0472777	2.52416	0.00748878	1.33001	0.52691	48.0959	0.637298	46.9047	1.15702	NA	NA	48.0959	0.637298
11CAT03 Spot 297	170.359	3603.33	2.91509	24.1141	2.78964	0.0429284	3.17184	0.0075111	1.50948	0.475898	48.2387	0.725434	42.6791	1.32566	NA	NA	48.2387	0.725434
11CAT03 Spot 70	189.27	5415.97	3.38664	21.4445	2.41886	0.0483453	3.15364	0.00752244	2.0235	0.641641	48.3113	0.973926	47.9393	1.4767	29.3603	57.9885	48.3113	0.973926
11CAT03 Spot 142	294.287	13916.7	1.50419	21.5967	1.99977	0.0481393	2.32767	0.00754352	1.1912	0.511758	48.4462	0.57493	47.7398	1.08551	12.4209	48.0827	48.4462	0.57493
11CAT03 Spot 151	287.939	102226	2.90298	21.0214	2.49101	0.049483	2.79823	0.00754755	1.27476	0.455558	48.4719	0.615582	49.0406	1.33966	76.9065	59.1636	48.4719	0.615582
11CAT03 Spot 232	253.374	7327.26	3.17792	22.6849	2.68803	0.0458548	3.01888	0.00754759	1.3741	0.455167	48.4722	0.663557	45.5242	1.34397	NA	NA	48.4722	0.663557
11CAT03 Spot 37	240.29	21998.7	2.9881	22.4492	1.77451	0.0463716	2.15253	0.00755338	1.21839	0.566029	48.5092	0.588814	46.0258	0.9686	NA	NA	48.5092	0.588814
11CAT03 Spot 137	191.342	11256.7	2.94284	21.5087	2.53685	0.0484143	2.79379	0.00755572	1.17033	0.418903	48.5242	0.565759	48.0061	1.30998	22.2014	60.8767	48.5242	0.565759
11CAT03 Spot 119	226.985	3640.13	2.90243	23.4201	2.54014	0.044465	2.90005	0.00755604	1.39926	0.482497	48.5263	0.676462	44.174	1.2536	NA	NA	48.5263	0.676462
11CAT03 Spot 217	268.748	11600.4	2.39616	22.3532	2.60911	0.0466057	3.2066	0.00755904	1.86409	0.58133	48.5454	0.901533	46.253	1.44988	NA	NA	48.5454	0.901533
11CAT03 Spot 292	237.222	15568.8	2.53482	21.3631	2.0252	0.0487848	2.48946	0.00756199	1.44775	0.581552	48.5644	0.700451	48.3649	1.1758	38.4668	48.466	48.5644	0.700451
11CAT03 Spot 172	619.879	46083.4	1.2823	21.7972	1.26265	0.047826	2.03034	0.00756403	1.58997	0.783105	48.5774	0.769465	47.4362	0.940968	NA	NA	48.5774	0.769465
11CAT03 Spot 81	313.597	9271.14	2.24684	21.7944	2.61427	0.0479078	3.33123	0.00757596	2.06463	0.61978	48.6537	1.00074	47.5154	1.54638	NA	NA	48.6537	1.00074
11CAT03 Spot 188	386.157	86911.5	1.48964	22.4763	2.16246	0.0464682	2.59015	0.00757825	1.42572	0.550438	48.6683	0.691261	46.1196	1.16785	NA	NA	48.6683	0.691261
11CAT03 Spot 98	379.099	8073.78	4.25853	21.664	2.08311	0.0482941	2.47293	0.00759136	1.33268	0.538907	48.7522	0.64726	47.8897	1.15678	4.90391	50.1494	48.7522	0.64726
11CAT03 Spot 265	592.438	151051	0.972133	21.0333	1.78496	0.0497748	2.23473	0.00759633	1.34459	0.601678	48.784	0.653469	49.3229	1.07589	75.5681	42.409	48.784	0.653469
11CAT03 Spot 84	579.212	11303.2	1.92828	22.416	1.86094	0.0467086	2.31864	0.00759699	1.38311	0.596517	48.7883	0.672249	46.3528	1.05059	NA	NA	48.7883	0.672249
11CAT03 Spot 71	263.089	34595.6	2.33943	21.9338	1.99636	0.0478115	2.52306	0.0076091	1.54285	0.611499	48.8657	0.751074	47.4221	1.16898	NA	NA	48.8657	0.751074
11CAT03 Spot 183	115.783	5160.4	2.59967	22.1019	4.26561	0.0474599	4.69706	0.00761104	1.96645	0.418656	48.8782	0.957529	47.0813	2.16095	NA	NA	48.8782	0.957529
11CAT03 Spot 284	408.538	20767.7	2.49826	22.3334	2.07077	0.0469761	2.57959	0.00761236	1.53824	0.596314	48.8866	0.74915	46.6123	1.17522	NA	NA	48.8866	0.74915
11CAT03 Spot 60	177.813	4930.41	3.56313	25.1433	4.1261	0.0417804	4.41995	0.00762224	1.58469	0.358532	48.9498	0.772766	41.5608	1.79988	NA	NA	48.9498	0.772766
11CAT03 Spot 215	177.527	10155	2.8349	21.699	2.65927	0.0484741	3.05773	0.00763198	1.50929	0.493599	49.0121	0.73693	48.064	1.43543	1.02394	64.0813	49.0121	0.73693
11CAT03 Spot 250	394.065	9353.66	2.25013	21.9435	2.06504	0.04794	2.50699	0.00763293	1.42148	0.567008	49.0182	0.694143	47.5467	1.16451	NA	NA	49.0182	0.694143
11CAT03 Spot 254	1090.71	14272	2.54173	21.7549	1.37246	0.0484065	2.31371	0.00764099	1.86269	0.805066	49.0697	0.910548	47.9986	1.08471	NA	NA	49.0697	0.910548
11CAT03 Spot 174	566.735	14647.9	2.29286	22.142	1.85019	0.0475648	2.26418	0.0076417	1.3051	0.576412	49.0743	0.638037	47.1831	1.04387	NA	NA	49.0743	0.638037
11CAT03 Spot 143	414.008	15079.4	2.60259	21.8886	2.15202	0.0481332	2.71356	0.00764453	1.65294	0.609141	49.0924	0.808388	47.7338	1.26531	NA	NA	49.0924	0.808388
11CAT03 Spot 302	228.072	3658.89	2.99469	22.6882	4.99008	0.0464649	5.13187	0.00764913	1.198	0.233443	49.1218	0.586243	46.1164	2.3137	NA	NA	49.1218	0.586243
11CAT03 Spot 89	572.076	21130.2	2.16412	20.9705	1.96199	0.050286	2.8761	0.00765145	2.10299	0.731194	49.1366	1.02941	49.8172	1.39822	82.6663	46.581	49.1366	1.02941
11CAT03 Spot 218	434.207	39320	1.86458	22.287	2.31472	0.0473178	2.76705	0.00765181	1.51613	0.547923	49.139	0.742178	46.9436	1.26938	NA	NA	49.139	0.742178
11CAT03 Spot 166	1750.79	68764.5	5.1593	21.3991	1.31691	0.0493299	1.74648	0.00765936	1.14715	0.656833	49.1873	0.562103	48.8925	0.833667	34.4588	31.527	49.1873	0.562103
11CAT03 Spot 86	265.256	12682.9	2.46202	20.0857	3.04238	0.0525671	3.39587	0.00766107	1.5086	0.444244	49.1982	0.739377	52.0202	1.72205	184.008	70.8938	49.1982	0.739377
11CAT03 Spot 105	195.312	2821.87	2.96457	23.2758	3.02653	0.0453638	3.42548	0.0076613	1.6044	0.468371	49.1997	0.786354	45.0474	1.50937	NA	NA	49.1997	0.786354
11CAT03 Spot 72	292.458	6341.8	2.10719	22.0197	2.91298	0.0479617	3.27132	0.00766289	1.48864	0.455059	49.2099	0.72977	47.5677	1.5202	NA	NA	49.2099	0.72977
11CAT03 Spot 122	262.648	5543.61	2.93726	22.8931	2.56596	0.0461573	3.13559	0.00766713	1.80216	0.574743	49.237	0.883949	45.8179	1.40473	NA	NA	49.237	0.883949
11CAT03 Spot 125	249.936	484927	2.40605	20.3588	2.33523	0.0519049	3.1364	0.0076674	2.09373	0.667559	49.2387	1.027	51.3811	1.57142	152.495	54.7185	49.2387	1.027
11CAT03 Spot 242	677.163	48752.5	1.63172	21.3372	1.43653	0.0495959	1.92471	0.00767839	1.28098	0.665544	49.309	0.629229	49.1499	0.923464	41.4173	34.3467	49.309	0.629229
11CAT03 Spot 13	216.722	3982.92	2.82082	22.3058	3.5428	0.0474827	3.79226	0.00768496	1.3527	0.356702	49.351	0.665024	47.1035	1.74549	NA	NA	49.351	0.665024
11CAT03 Spot 178	228.967	45047.9	2.71594	21.6947	2.29622	0.0488602	2.72467	0.00769125	1.4667	0.538304	49.3913	0.721655	48.4379	1.28879	1.49828	55.3158	49.3913	0.721655
11CAT03 Spot 216	370.485	9189.03	0.945856	21.599	2.23197	0.0490867	2.64594	0.00769283	1.42101	0.537054	49.4014	0.699317	48.6571	1.25708	12.1275	53.6697	49.4014	0.699317
11CAT03 Spot 190	296.417	6184.32	2.67163	23.5736	3.12071	0.0450205	3.6026	0.0077006	1.79997	0.49963	49.4511	0.886698	44.7139	1.57591	NA	NA	49.4511	0.886698
11CAT03 Spot 3	571.998	32909.6	2.02528	17.6973	3.5165	0.0600046	3.79386	0.00770513	1.42395	0.37533	49.4801	0.701874	59.1697	2.18067	471.332	77.8602	49.4801	0.701874
11CAT03 Spot 251	240.514	7405.25	2.59264	22.2698	2.6642	0.0477755	3.02249	0.00771986	1.42741	0.472262	49.5743	0.704913	47.3873	1.39937	NA	NA	49.5743	0.704913
11CAT03 Spot 26	1239.26	65344.9	2.66509	21.1667	1.02163	0.0505169	1.84219	0.00775851	1.53295	0.832136	49.8215	0.760796	50.0404	0.899494	60.5158	24.3694	49.8215	0.760796
11CAT03 Spot 39	337.797	29649.6	3.48574	21.7952	2.09272	0.0490648	2.45734	0.00775924	1.28804	0.524161	49.8262	0.639308	48.6359	1.16698	NA	NA	49.8262	0.639308
11CAT03 Spot 133	498.61	45963.5	1.46782	21.5758	1.40719	0.0496227	1.90065	0.00776845	1.2776	0.672195	49.8851	0.634875	49.1758	0.912386	14.755	33.8027	49.8851	0.634875
11CAT03 Spot 22	518.897	10605.2	1.70309	22.2262	1.80351	0.0481986	2.30079	0.00777298	1.42864	0.620933	49.9141	0.710339	47.7972	1.07423	NA	NA	49.9141	0.710339
11CAT03 Spot 160	522.371	178114	1.34792	21.2763	1.57945	0.0503801	2.02595	0.00777756	1.26878	0.626265	49.9434	0.631225	49.9082	0.986669	48.2312	37.7394	49.9434	0.631225
11CAT03 Spot 301	246.374	5260.46	2.26682	21.9655	3.88917	0.048859	4.14586	0.00778706	1.43614	0.346404	50.0042	0.715352	48.4367	1.96097	NA	NA	50.0042	0.715352
11CAT03 Spot 0	293.185	7164.02	3.36353	21.2584	2.45191	0.0505048	2.89795	0.00779024	1.54474	0.533045	50.0245	0.769756	50.0288	1.41467	50.2495	58.5376	50.0245	0.769756
11CAT03 Spot 96	239.766	6272.14	2.009	18.1107	3.19391	0.059359	3.47054	0.00780026	1.35779	0.391233	50.0886	0.677463	58.551	1.97456	419.985	71.3188	50.0886	0.677463
11CAT03 Spot 171	115.84	2747.29	1.21703	22.8096	4.61143	0.0471738	4.82437	0.00780741	1.41747	0.293815	50.1343	0.707884	46.804	2.20675	NA	NA	50.1343	0.707884
11CAT03 Spot 157	784.121	23987.9	0.693437	21.8909	1.4434	0.0491723	2.16095	0.00781037	1.6082	0.74421	50.1533	0.803436	48.74	1.02837	NA	NA	50.1533	0.803436
11CAT03 Spot 191	228.108	11493.8	2.60681	21.3528	1.93629	0.0504172	2.32957	0.00781127	1.29526	0.556006	50.1591	0.647167	49.9441	1.13533	39.6615	46.3277	50.1591	0.647167
11CAT03 Spot 108	366.28	5568.91	1.08027	22.709	2.47771	0.0475179	2.917	0.00782967	1.53944	0.527746	50.2767	0.770968	47.1376	1.34358	NA	NA	50.2767	0.770968
11CAT03 Spot 227	376.318	6401.82	1.58497	22.5462	3.19596	0.0481253	3.43451	0.00787288	1.25765	0.36618	50.5531	0.633294	47.7262	1.60123	NA	NA	50.5531	0.633294
11CAT03 Spot 46	512.201	50377.3	2.0286	21.7522	1.61466	0.0498889	2.03549	0.00787402	1.23939	0.608891	50.5604	0.62419	49.4333	0.98211	NA	NA	50.5604	0.62419
11CAT03 Spot 32	230.02	10378.1	1.29919	22.5283	3.04521	0.0482369	3.37188	0.00788489	1.44785	0.429389	50.6299	0.730172	47.8343	1.57551	NA	NA	50.6299	0.730172
11CAT03 Spot 310	282.103	6344.8	1.30213	22.3309	2.06094	0.0488406	2.3471	0.00791361	1.12313	0.478517	50.8136	0.568458	48.4189	1.10977	NA	NA	50.8136	0.568458
11CAT03 Spot 225	334.758	16707.6	1.66431	21.3446	2.51224	0.0511136	2.93682	0.00791612	1.52105	0.517924	50.8297	0.770105	50.617	1.45009	40.5809	60.0989	50.8297	0.770105
11CAT03 Spot 203	558.608	76854.5	2.2692	21.4613	1.49627	0.0509406	2.02813	0.00793248	1.36912	0.675066	50.9343	0.694604	50.4499	0.998186	27.52	35.8748	50.9343	0.694604
11CAT03 Spot 303	237.669	50526.8	1.10856	18.3205	4.06818	0.0597305	4.31228	0.00794001	1.43026	0.331672	50.9825	0.726307	58.9071	2.46796	394.211	91.2897	50.9825	0.726307
11CAT03 Spot 103	467.657	10989.3	2.3393	22.5585	2.23899	0.048607	2.77601	0.00795606	1.64108	0.591165	51.0851	0.835035	48.1928	1.30659	NA	NA	51.0851	0.835035
11CAT03 Spot 307	229.139	10752.8	2.17937	21.1234	1.99076	0.0519585	2.3108	0.00796358	1.17332	0.507754	51.1332	0.597583	51.4329	1.15891	65.4028	47.3986	51.1332	0.597583
11CAT03 Spot 48	145.996	1932.6	3.04794	25.125	6.61645	0.0437741	6.95545	0.00798017	2.14498	0.308388	51.2393	1.09472	43.5022	2.96188	NA	NA	51.2393	1.09472
11CAT03 Spot 199	174.281	8346.24	2.19332	22.1988	3.18758	0.0496103	3.48766	0.00799078	1.4153	0.405803	51.3072	0.72327	49.1638	1.67382	NA	NA	51.3072	0.72327
11CAT03 Spot 5	118.208	2811.27	1.77116	26.1372	5.9545	0.0421891	6.0921	0.00800105	1.28751	0.21134	51.3728	0.6588	41.9591	2.5041	NA	NA	51.3728	0.6588
11CAT03 Spot 82	112.349	12186.3	1.85442	22.3256	3.73388	0.0494758	4.02243	0.00801462	1.49602	0.371919	51.4596	0.766781	49.0336	1.92548	NA	NA	51.4596	0.766781
11CAT03 Spot 261	1712.33	113771	1.80915	21.3438	1.11028	0.0517767	1.68286	0.00801852	1.26464	0.75148	51.4846	0.648499	51.2574	0.84118	40.6717	26.5655	51.4846	0.648499
11CAT03 Spot 47	726.949	27056.6	1.02502	20.9663	1.71629	0.0527515	2.26532	0.00802498	1.47851	0.652673	51.5259	0.758779	52.198	1.15257	83.1449	40.7184	51.5259	0.758779
11CAT03 Spot 282	473.783	66170.2	1.95471	21.578	2.04649	0.0516286	2.46081	0.0080833	1.36655	0.555326	51.8988	0.706376	51.1144	1.22669	14.4842	49.1744	51.8988	0.706376
11CAT03 Spot 44	440.044	14012.8	2.03846	21.0185	2.09037	0.0530142	2.63892	0.00808503	1.61067	0.610353	51.9099	0.832742	52.4514	1.34901	77.2365	49.6761	51.9099	0.832742
11CAT03 Spot 16	697.153	32641	3.61798	20.8344	1.41637	0.0535954	2.18116	0.00810205	1.65872	0.760476	52.0187	0.859373	53.0116	1.1266	98.1116	33.5167	52.0187	0.859373
11CAT03 Spot 139	262.295	39325.9	1.50577	21.8369	2.17167	0.0512532	2.69692	0.00812082	1.59914	0.592948	52.1387	0.830406	50.7519	1.33509	NA	NA	52.1387	0.830406
11CAT03 Spot 162	293.71	16465.9	1.53697	20.7912	2.33713	0.0538789	3.00902	0.00812806	1.89527	0.629862	52.185	0.985053	53.2848	1.56201	103.047	55.2741	52.185	0.985053
11CAT03 Spot 245	122.444	10617.2	1.65718	21.9706	3.13027	0.0509905	3.45034	0.00812866	1.45131	0.420627	52.1889	0.754363	50.4981	1.69974	NA	NA	52.1889	0.754363
11CAT03 Spot 128	285.667	48805.2	1.43854	21.4417	2.38711	0.0522967	2.71232	0.0081362	1.28779	0.474794	52.2371	0.669988	51.7592	1.3687	29.6646	57.2237	52.2371	0.669988
11CAT03 Spot 30	520.212	84175.9	1.68556	21.4334	1.4407	0.0523294	2.04606	0.00813813	1.45284	0.710068	52.2494	0.756032	51.7908	1.0331	30.6003	34.5154	52.2494	0.756032
11CAT03 Spot 43	912.681	38542.5	1.56988	21.4427	1.28488	0.0523132	2.00572	0.00813915	1.54013	0.767866	52.256	0.801554	51.7752	1.01243	29.6013	30.7832	52.256	0.801554
11CAT03 Spot 211	471.84	215336	2.63247	21.4942	1.75979	0.0523261	2.26955	0.0081607	1.43319	0.631485	52.3937	0.747859	51.7876	1.14588	23.8252	42.2219	52.3937	0.747859
11CAT03 Spot 167	500.864	58543.2	0.937972	20.6327	2.26195	0.0545244	2.57083	0.00816271	1.22179	0.475249	52.4066	0.637701	53.9066	1.3497	121.098	53.2832	52.4066	0.637701
11CAT03 Spot 165	651.205	35211.3	2.00036	21.7491	1.40078	0.0517338	2.07152	0.00816401	1.5261	0.736708	52.415	0.796664	51.216	1.03464	NA	NA	52.415	0.796664
11CAT03 Spot 296	102.381	13908.6	1.7051	20.7381	3.26969	0.054322	3.52018	0.00817397	1.30414	0.370475	52.4786	0.681614	53.7117	1.84161	109.059	77.2296	52.4786	0.681614
11CAT03 Spot 138	367.929	6798.67	2.01728	19.9649	3.1288	0.0565307	3.4607	0.00818915	1.47888	0.427335	52.5757	0.774368	55.8365	1.88017	198.04	72.6772	52.5757	0.774368
11CAT03 Spot 64	496.412	146085	1.70221	21.2061	1.60968	0.0532514	2.21566	0.00819369	1.52252	0.687165	52.6047	0.797659	52.68	1.13745	56.111	38.411	52.6047	0.797659
11CAT03 Spot 304	717.918	61679.7	3.09343	20.7174	1.79425	0.0545217	2.16085	0.00819583	1.20415	0.557255	52.6184	0.631025	53.9039	1.13441	111.413	42.3417	52.6184	0.631025
11CAT03 Spot 289	1099.36	14717.8	1.26301	21.1053	1.86867	0.0535528	2.37442	0.00820092	1.46491	0.616956	52.6509	0.76815	52.9706	1.2255	67.4794	44.4591	52.6509	0.76815
11CAT03 Spot 269	375.995	20802.7	2.28372	21.5474	1.61685	0.0524766	2.28479	0.00820442	1.61434	0.706557	52.6733	0.846861	51.9329	1.15673	17.8728	38.8201	52.6733	0.846861
11CAT03 Spot 42	797.435	38733.3	2.68356	21.417	1.37572	0.0528693	2.12388	0.00821581	1.61811	0.761862	52.7462	0.850007	52.3116	1.0829	32.4736	32.9416	52.7462	0.850007
11CAT03 Spot 173	241.807	10690.3	1.80001	21.5283	2.43846	0.0526034	2.95544	0.00821696	1.66989	0.565023	52.7535	0.877329	52.0551	1.49969	20.0123	58.5388	52.7535	0.877329
11CAT03 Spot 234	936.735	26022.1	2.1914	21.2977	1.28714	0.0534864	1.94174	0.00826539	1.45384	0.748728	53.0632	0.768285	52.9066	1.001	45.8077	30.7483	53.0632	0.768285
11CAT03 Spot 156	426.115	8859.14	1.71367	22.5602	2.50119	0.0505438	2.98092	0.00827367	1.62171	0.544029	53.1161	0.857847	50.0664	1.45624	NA	NA	53.1161	0.857847
11CAT03 Spot 134	721.966	59382.8	2.9176	21.6389	1.5842	0.0528343	2.25532	0.00829543	1.60524	0.711757	53.2552	0.851352	52.2779	1.1492	7.71092	38.1222	53.2552	0.851352
11CAT03 Spot 116	1221.71	22442.3	1.62864	21.0903	1.2027	0.0542373	1.91489	0.0082998	1.49006	0.778148	53.2831	0.79068	53.63	1.0003	69.1591	28.6149	53.2831	0.79068
11CAT03 Spot 175	639.911	161735	1.88163	21.2239	1.50574	0.0539234	2.25624	0.00830407	1.68028	0.744727	53.3104	0.892071	53.3277	1.17215	54.1189	35.9175	53.3104	0.892071
11CAT03 Spot 258	1274.84	81621.2	2.50857	20.9641	1.17537	0.0547295	1.79671	0.00832503	1.35893	0.756341	53.4444	0.723269	54.104	0.946649	83.3863	27.8883	53.4444	0.723269
11CAT03 Spot 243	181.642	21105.4	2.0041	21.0208	3.11241	0.0546722	3.54498	0.0083388	1.697	0.478706	53.5325	0.904687	54.0488	1.86592	76.9757	73.965	53.5325	0.904687
11CAT03 Spot 179	303.003	43417.4	2.03426	21.6836	1.92767	0.0530546	2.31025	0.00834725	1.27333	0.551165	53.5865	0.679506	52.4903	1.18185	2.72804	46.4447	53.5865	0.679506
11CAT03 Spot 249	584.207	23002.8	2.48252	21.1957	1.6995	0.0543677	2.3368	0.00836134	1.60386	0.686347	53.6766	0.857322	53.7556	1.22349	57.2578	40.5494	53.6766	0.857322
11CAT03 Spot 208	190.98	16681.9	1.51815	21.4413	2.53545	0.0539134	2.92486	0.00838756	1.45818	0.498546	53.8442	0.781872	53.3181	1.51924	29.7513	60.7674	53.8442	0.781872
11CAT03 Spot 59	1043.53	42589.7	2.6897	21.1533	1.16801	0.0547074	1.57866	0.00839675	1.06204	0.672748	53.9029	0.570086	54.0828	0.831446	62.0453	27.8383	53.9029	0.570086
11CAT03 Spot 69	1255.92	55063.6	2.12497	21.2906	1.0655	0.0544331	1.77847	0.00840889	1.42397	0.800668	53.9806	0.765455	53.8186	0.932225	46.613	25.4615	53.9806	0.765455
11CAT03 Spot 233	1022.46	17671.5	1.66167	21.7645	1.19737	0.0532616	1.96909	0.00841106	1.56321	0.793875	53.9944	0.840522	52.6899	1.01105	NA	NA	53.9944	0.840522
11CAT03 Spot 246	676.024	16754	2.95726	20.7463	1.85977	0.0559711	2.11849	0.00842545	1.01451	0.478886	54.0864	0.546419	55.2986	1.14017	108.137	43.9394	54.0864	0.546419
11CAT03 Spot 54	275.419	17303.4	1.80899	20.9781	2.21705	0.0553812	2.4984	0.0084298	1.15182	0.461024	54.1142	0.620691	54.7312	1.33121	81.8001	52.6275	54.1142	0.620691
11CAT03 Spot 158	662.952	17567.1	1.06349	21.4539	1.39569	0.0541612	2.16869	0.00843104	1.65991	0.765395	54.1221	0.894617	53.5567	1.13138	28.3325	33.441	54.1221	0.894617
11CAT03 Spot 117	1040.54	27064.5	2.759	22.0666	1.34654	0.0526915	2.03623	0.00843654	1.52744	0.750129	54.1573	0.823753	52.1402	1.0349	NA	NA	54.1573	0.823753
11CAT03 Spot 185	717.014	15698.2	3.22746	21.609	1.6473	0.0538891	2.13674	0.00844936	1.36091	0.636909	54.2393	0.735051	53.2946	1.1094	11.0246	39.6247	54.2393	0.735051
11CAT03 Spot 132	771.145	158370	2.05954	19.6758	1.83365	0.0593081	2.42339	0.00846708	1.58447	0.653823	54.3525	0.85758	58.5022	1.37767	231.824	42.3165	54.3525	0.85758
11CAT03 Spot 45	914.515	98892.4	1.64493	21.7629	0.81679	0.0536883	1.79379	0.00847782	1.59704	0.890316	54.4212	0.865467	53.1011	0.928042	NA	NA	54.4212	0.865467
11CAT03 Spot 14	584.18	17925.6	2.22176	21.1448	1.34306	0.0553372	2.06993	0.00849001	1.57506	0.760924	54.4991	0.854776	54.6889	1.10208	62.9871	31.9925	54.4991	0.854776
11CAT03 Spot 219	841.274	72883	0.923461	21.2153	1.62327	0.0551903	2.40095	0.00849572	1.76906	0.736814	54.5356	0.960696	54.5475	1.2751	55.0642	38.7325	54.5356	0.960696
11CAT03 Spot 196	744.869	22074	1.19724	21.9227	1.14933	0.05341	1.84075	0.00849581	1.43785	0.781121	54.5362	0.780841	52.833	0.947656	NA	NA	54.5362	0.780841
11CAT03 Spot 305	867.023	52713.5	0.798989	21.3368	1.44366	0.0550702	2.06011	0.00852578	1.46965	0.713385	54.7277	0.8009	54.4319	1.09183	41.4554	34.5285	54.7277	0.8009
11CAT03 Spot 285	875.696	114176	2.66005	21.9271	1.17935	0.0537663	1.69755	0.0085542	1.22098	0.719262	54.9094	0.667588	53.1764	0.879465	NA	NA	54.9094	0.667588
11CAT03 Spot 298	628.788	18799.7	1.03096	21.2315	1.67065	0.0555418	2.08507	0.00855635	1.24758	0.598338	54.9231	0.682298	54.8857	1.11403	53.2277	39.8535	54.9231	0.682298
11CAT03 Spot 148	818.077	42583.9	3.28736	21.3079	1.50706	0.0553592	1.97009	0.00855891	1.26886	0.644063	54.9395	0.694143	54.7101	1.04931	44.6837	36	54.9395	0.694143
11CAT03 Spot 230	467.625	24993.9	0.963598	21.7509	1.40941	0.0542625	1.86263	0.00856377	1.21777	0.653789	54.9705	0.666567	53.6544	0.973437	NA	NA	54.9705	0.666567
11CAT03 Spot 8	564.372	38156.7	2.30959	21.358	1.35165	0.0553796	1.89799	0.00858219	1.33245	0.702031	55.0883	0.730896	54.7297	1.01127	39.0826	32.347	55.0883	0.730896
11CAT03 Spot 121	383.122	9964.93	1.27188	19.3921	3.07367	0.0610093	3.87835	0.00858437	2.36521	0.609848	55.1022	1.29773	60.1316	2.26441	265.287	70.5303	55.1022	1.29773
11CAT03 Spot 127	549.805	11396.3	2.77024	21.4488	1.50133	0.0552816	2.07555	0.00860341	1.43315	0.69049	55.2239	0.788059	54.6353	1.10401	28.8804	35.9696	55.2239	0.788059
11CAT03 Spot 99	1196.09	17411.2	1.77224	21.3287	1.50491	0.0556044	1.99587	0.00860519	1.31101	0.656861	55.2353	0.721048	54.9459	1.06751	42.3369	35.982	55.2353	0.721048
11CAT03 Spot 101	1339.87	23538.2	2.68612	21.4982	1.28793	0.0552392	1.93522	0.00861664	1.4444	0.746379	55.3085	0.795462	54.5946	1.02862	23.3524	30.904	55.3085	0.795462
11CAT03 Spot 27	944.468	94450.5	1.03672	21.2365	1.36476	0.0559353	1.91475	0.00861898	1.34301	0.701403	55.3234	0.73982	55.2642	1.02989	52.6944	32.5759	55.3234	0.73982
11CAT03 Spot 100	842.868	13536.5	1.30145	21.7759	1.79129	0.0545551	2.23964	0.00861985	1.34435	0.600253	55.329	0.740633	53.9361	1.17645	NA	NA	55.329	0.740633
11CAT03 Spot 229	912.066	49786.6	1.4593	21.454	1.81378	0.0553959	2.50621	0.00862331	1.72954	0.690101	55.3511	0.95322	54.7454	1.3357	28.2919	43.4671	55.3511	0.95322
11CAT03 Spot 237	872.311	15131.5	2.59756	21.1127	1.14927	0.0563089	2.0645	0.00862598	1.71503	0.830727	55.3682	0.945516	55.6234	1.11746	66.6354	27.3331	55.3682	0.945516
11CAT03 Spot 111	978.187	16879	1.19233	21.7631	1.28786	0.054778	1.95449	0.00864996	1.47019	0.752212	55.5214	0.812767	54.1507	1.03065	NA	NA	55.5214	0.812767
11CAT03 Spot 198	1643.26	31874.3	4.0806	21.6002	1.03421	0.0552167	1.55607	0.00865397	1.16266	0.747175	55.547	0.643046	54.5729	0.826776	12.0329	24.8496	55.547	0.643046
11CAT03 Spot 149	1409.42	101270	2.54093	21.5459	1.26463	0.0554021	1.90714	0.00866121	1.42754	0.748526	55.5933	0.790206	54.7513	1.01653	18.0346	30.3687	55.5933	0.790206
11CAT03 Spot 145	294.761	19735.9	2.11322	21.3154	2.07323	0.056005	2.40533	0.0086618	1.21957	0.507027	55.5971	0.675128	55.3312	1.29529	43.8124	49.5463	55.5971	0.675128
11CAT03 Spot 115	897.794	49486	1.05103	21.8902	1.4442	0.0545995	2.06308	0.00867215	1.47329	0.714122	55.6633	0.816553	53.9788	1.08455	NA	NA	55.6633	0.816553
11CAT03 Spot 6	599.002	23876	1.1616	21.578	1.48919	0.055527	1.97859	0.00869368	1.30274	0.658417	55.8008	0.723802	54.8715	1.05687	14.4814	35.7941	55.8008	0.723802
11CAT03 Spot 18	588.398	55021.7	1.36352	20.7663	1.44401	0.0577118	1.88812	0.00869585	1.21648	0.644281	55.8147	0.676045	56.971	1.04606	105.832	34.1242	55.8147	0.676045
11CAT03 Spot 12	1978.63	16535.5	3.05474	19.9596	1.25135	0.0600661	1.83208	0.00869901	1.33815	0.730397	55.8349	0.743928	59.2286	1.05408	198.66	29.0901	55.8349	0.743928
11CAT03 Spot 275	800.074	14199.4	1.41429	21.8015	1.13813	0.0550329	1.90703	0.00870558	1.53017	0.802385	55.8769	0.851316	54.3961	1.01005	NA	NA	55.8769	0.851316
11CAT03 Spot 38	1924.47	62885.2	3.39996	21.5277	1.18733	0.0558919	1.85055	0.0087304	1.41942	0.76703	56.0355	0.791934	55.2224	0.994624	20.1119	28.4891	56.0355	0.791934
11CAT03 Spot 66	988.172	11861.9	1.23178	21.7544	1.21429	0.0553514	1.68102	0.00873704	1.16246	0.69152	56.078	0.649055	54.7025	0.895227	NA	NA	56.078	0.649055
11CAT03 Spot 259	631.818	80341.1	1.80228	21.4421	1.42025	0.0562678	2.05981	0.00875416	1.49188	0.72428	56.1873	0.834605	55.5839	1.11415	29.64	34.0355	56.1873	0.834605
11CAT03 Spot 77	2423.08	213751	3.2061	21.1341	0.966175	0.057223	1.51136	0.00877492	1.16221	0.76898	56.32	0.651705	56.5017	0.830621	64.1978	23.0084	56.32	0.651705
11CAT03 Spot 238	462.02	111192	3.69068	21.1713	1.50928	0.0572409	2.04954	0.00879309	1.38662	0.67655	56.4361	0.779139	56.5188	1.12673	60.0008	35.9615	56.4361	0.779139
11CAT03 Spot 177	796.704	178688	2.31134	21.3672	1.05634	0.0567216	1.8418	0.00879395	1.50876	0.819178	56.4417	0.847853	56.02	1.00383	38.004	25.2809	56.4417	0.847853
11CAT03 Spot 155	710.482	26496.3	2.16368	21.8824	1.45318	0.0554077	1.95873	0.00879735	1.31336	0.670513	56.4634	0.738326	54.7567	1.04413	NA	NA	56.4634	0.738326
11CAT03 Spot 28	954.979	38337.7	2.02718	21.4064	1.32542	0.056703	1.81574	0.00880719	1.24104	0.683488	56.5262	0.698444	56.0021	0.98932	33.6386	31.7363	56.5262	0.698444
11CAT03 Spot 164	1558.49	283183	3.84154	19.3589	1.0616	0.062822	1.60212	0.00882428	1.19991	0.748952	56.6354	0.676596	61.8649	0.961556	269.188	24.3564	56.6354	0.676596
11CAT03 Spot 92	648.409	937926	1.21014	21.5002	1.10563	0.0565719	1.53132	0.00882533	1.05948	0.691877	56.6421	0.597485	55.8762	0.832525	23.183	26.535	56.6421	0.597485
11CAT03 Spot 29	1150.93	50013.8	1.67261	21.4895	1.16011	0.0566544	1.80874	0.00883382	1.3877	0.767215	56.6964	0.783323	55.9554	0.984709	24.3715	27.8264	56.6964	0.783323
11CAT03 Spot 267	685.591	56291.3	1.06774	21.125	1.2959	0.0576403	1.87244	0.00883507	1.35155	0.721811	56.7044	0.763027	56.9023	1.03616	65.2298	30.8651	56.7044	0.763027
11CAT03 Spot 107	1516.28	849249	1.75784	20.8937	1.18527	0.058279	1.82734	0.00883516	1.3908	0.761104	56.705	0.785192	57.5153	1.02179	91.3689	28.0801	56.705	0.785192
11CAT03 Spot 7	1118.9	125973	0.576133	21.5268	0.952836	0.0565672	1.50699	0.00883552	1.16753	0.774743	56.7073	0.659173	55.8717	0.819236	20.1656	22.87	56.7073	0.659173
11CAT03 Spot 141	1301.38	53111.3	2.36749	21.7816	1.1128	0.0559191	1.87477	0.00883765	1.50878	0.804785	56.7209	0.852042	55.2486	1.00811	NA	NA	56.7209	0.852042
11CAT03 Spot 135	1478.31	80202.7	2.60963	21.6365	1.39898	0.0563321	2.48485	0.00884362	2.05361	0.826453	56.759	1.16049	55.6457	1.34551	7.94989	33.6612	56.759	1.16049
11CAT03 Spot 61	1028.85	239626	2.32888	21.1223	1.30428	0.0577123	1.82038	0.008845	1.2699	0.697601	56.7678	0.717729	56.9715	1.00854	65.5519	31.0589	56.7678	0.717729
11CAT03 Spot 314	1355.82	25799.1	3.0614	21.2577	1.02504	0.0573572	1.80208	0.0088469	1.48216	0.82247	56.78	0.837874	56.6305	0.992591	50.3191	24.4842	56.78	0.837874
11CAT03 Spot 168	1093.86	27042.5	0.484007	22.0226	1.02118	0.0553839	1.58145	0.00884992	1.20755	0.763571	56.7993	0.682868	54.7338	0.842674	NA	NA	56.7993	0.682868
11CAT03 Spot 40	975.142	122085	2.27265	21.1876	1.26352	0.0576773	1.90965	0.00886694	1.43188	0.749812	56.9081	0.811267	56.9379	1.05739	58.1691	30.1299	56.9081	0.811267
11CAT03 Spot 11	1452.3	29189.7	1.51539	21.3841	1.03318	0.0572359	1.66452	0.00888069	1.30504	0.784039	56.9959	0.740544	56.5141	0.914987	36.1149	24.7353	56.9959	0.740544
11CAT03 Spot 87	2478.19	113194	2.73677	21.3789	1.13836	0.0573016	1.71176	0.00888872	1.27838	0.746823	57.0472	0.726064	56.5771	0.941978	36.6973	27.2576	57.0472	0.726064
11CAT03 Spot 76	766.11	11623.2	2.09542	21.9512	1.43842	0.0559424	1.7282	0.00891019	0.957935	0.554295	57.1844	0.545367	55.271	0.929664	NA	NA	57.1844	0.545367
11CAT03 Spot 34	1495.35	231013	2.05419	21.136	1.02875	0.058114	1.78684	0.00891232	1.46099	0.817634	57.198	0.831959	57.3571	0.996473	64.0131	24.5001	57.198	0.831959
11CAT03 Spot 124	1243.08	24480	2.52089	21.3031	1.05296	0.0577988	1.58014	0.00893407	1.17819	0.745622	57.337	0.672544	57.0545	0.876682	45.2331	25.1705	57.337	0.672544
11CAT03 Spot 163	2208.06	88392.3	2.63187	21.289	1.10803	0.0579477	1.59041	0.00895114	1.14091	0.717368	57.4461	0.652495	57.1975	0.884526	46.7868	26.4598	57.4461	0.652495
11CAT03 Spot 288	893.578	50318.9	2.31181	21.4956	1.03154	0.0574258	1.93368	0.00895662	1.63556	0.845826	57.4811	0.935959	56.6964	1.06628	23.6792	24.7359	57.4811	0.935959
11CAT03 Spot 231	2049.47	283257	0.634762	21.6898	0.923969	0.0570929	1.44938	0.00898517	1.11668	0.770456	57.6635	0.641047	56.3767	0.794843	2.05875	22.2624	57.6635	0.641047
11CAT03 Spot 184	1332.22	364182	2.14105	21.7101	1.24416	0.0570622	1.88	0.00898871	1.40943	0.749693	57.6861	0.809416	56.3472	1.03047	NA	NA	57.6861	0.809416
11CAT03 Spot 62	1202.23	35499.8	2.25705	21.4369	1.15838	0.0581147	1.83206	0.00903931	1.41937	0.774738	58.0093	0.819673	57.3577	1.0217	30.256	27.7529	58.0093	0.819673
11CAT03 Spot 306	648.248	13835.4	1.10441	22.0575	2.00608	0.0567374	5.24285	0.00908059	4.84387	0.923901	58.2731	2.80995	56.0351	2.85825	NA	NA	58.2731	2.80995
11CAT03 Spot 274	284.061	4836.85	1.78027	22.8219	2.11483	0.0551058	2.67221	0.00912508	1.63346	0.611278	58.5573	0.95218	54.4662	1.41711	NA	NA	58.5573	0.95218
11CAT03 Spot 279	2092.98	1.21933e+06	2.43425	20.9727	1.12682	0.0604323	1.71396	0.00919627	1.29148	0.753509	59.012	0.758653	59.5792	0.991784	82.4116	26.7229	59.012	0.758653
11CAT03 Spot 209	365.352	13713.5	1.55228	22.0542	2.10558	0.057745	2.72534	0.00924048	1.73032	0.634903	59.2944	1.02128	57.0029	1.51072	NA	NA	59.2944	1.02128
11CAT03 Spot 1	713.997	13231.4	3.23652	15.9808	2.03352	0.0801131	2.39417	0.00928946	1.26368	0.527813	59.6073	0.749771	78.2513	1.8031	692.911	43.3488	59.6073	0.749771
11CAT03 Spot 154	2171.45	44251.5	0.365171	21.3336	0.997034	0.060051	1.68552	0.00929548	1.35901	0.806285	59.6457	0.806855	59.2141	0.969525	41.7994	23.8535	59.6457	0.806855
11CAT03 Spot 312	1235.78	3501.78	4.84574	8.63631	15.0151	0.149121	15.0768	0.00934444	1.3618	0.0903245	59.9584	0.812728	141.135	19.8685	1891.41	271.767	59.9584	0.812728
11CAT03 Spot 150	897.441	24487.7	0.349601	21.4945	1.39013	0.0600936	2.03868	0.00937226	1.49122	0.731465	60.1361	0.892592	59.2549	1.17344	23.8031	33.3355	60.1361	0.892592
11CAT03 Spot 221	1657.56	53310.5	1.8567	16.5176	3.62703	0.078606	3.87182	0.00942088	1.35487	0.349931	60.4466	0.815145	76.8335	2.8651	622.02	78.2798	60.4466	0.815145
11CAT03 Spot 109	203.923	5399.85	0.587063	21.7883	2.25097	0.0598872	2.58763	0.00946773	1.27631	0.493236	60.7458	0.771663	59.0573	1.48459	NA	NA	60.7458	0.771663
11CAT03 Spot 193	1803.92	55666.4	1.89999	21.6226	0.952713	0.0618196	1.78102	0.00969887	1.50478	0.844898	62.2217	0.931793	60.9068	1.05287	9.5208	22.9126	62.2217	0.931793
11CAT03 Spot 313	618.738	11400.1	0.86114	16.7922	2.45605	0.0796215	2.81732	0.00970118	1.38026	0.489919	62.2365	0.85489	77.789	2.10972	586.38	53.3151	62.2365	0.85489
11CAT03 Spot 51	2192.02	119024	2.01249	21.1606	0.773377	0.0639714	1.37051	0.00982204	1.13145	0.82557	63.008	0.709431	62.9624	0.836696	61.2381	18.4195	63.008	0.709431
11CAT03 Spot 159	1279.54	6165.25	0.904961	11.5767	6.12819	0.119916	6.42321	0.0100728	1.92429	0.299583	64.6088	1.23705	114.996	6.98365	1345.85	118.421	64.6088	1.23705
11CAT03 Spot 293	3959.76	81344.3	1.68633	21.1126	0.812671	0.0661827	1.4426	0.0101385	1.19192	0.826227	65.0279	0.771183	65.0705	0.909263	66.639	19.3544	65.0279	0.771183
11CAT03 Spot 212	2306.21	11682	2.55359	12.8906	6.11129	0.108771	6.24589	0.0101736	1.28966	0.206481	65.2522	0.837284	104.841	6.2216	1135.18	121.731	65.2522	0.837284
11CAT03 Spot 295	288.097	12316.9	1.79684	21.3257	1.72456	0.0732722	2.1106	0.0113378	1.21677	0.576504	72.6772	0.879348	71.7999	1.46307	42.6578	41.2318	72.6772	0.879348
11CAT03 Spot 2	572.849	43939	1.33197	21.1027	1.23115	0.0745082	1.50445	0.0114085	0.864664	0.574736	73.1278	0.628737	72.9686	1.05926	67.7766	29.3006	73.1278	0.628737
11CAT03 Spot 120	612.105	16104.1	2.44417	22.1514	1.8693	0.0709834	2.37723	0.011409	1.46865	0.6178	73.1305	1.06796	69.6323	1.59983	NA	NA	73.1305	1.06796
11CAT03 Spot 276	295.404	796610	2.27269	19.7658	1.5425	0.07966	2.32754	0.0114246	1.74304	0.748873	73.2303	1.26921	77.8253	1.74374	221.278	35.6955	73.2303	1.26921
11CAT03 Spot 273	306.496	59629	1.84893	21.9302	2.00703	0.0718093	2.36633	0.0114264	1.25354	0.529738	73.2419	0.912918	70.415	1.60979	NA	NA	73.2419	0.912918
11CAT03 Spot 126	625.398	15771.9	2.46081	21.4919	1.35655	0.0733257	1.90577	0.0114345	1.33855	0.702369	73.2936	0.975518	71.8505	1.32198	24.0967	32.5507	73.2936	0.975518
11CAT03 Spot 104	755.348	123289	1.83706	20.9503	1.03096	0.0755373	1.60654	0.0114826	1.2321	0.766931	73.5997	0.901669	73.9405	1.14566	84.9962	24.4426	73.5997	0.901669
11CAT03 Spot 49	501.897	483915	1.27693	21.2494	1.42002	0.0745456	2.09245	0.0114936	1.53684	0.734471	73.6701	1.12575	73.0039	1.47395	51.2436	33.9235	73.6701	1.12575
11CAT03 Spot 75	1041.89	142033	1.98703	21.3679	0.837081	0.074247	1.58141	0.0115114	1.3417	0.848419	73.7834	0.984309	72.7217	1.10981	37.9274	20.0335	73.7834	0.984309
11CAT03 Spot 147	842.312	371669	1.29928	20.7921	1.17909	0.0763445	1.70699	0.0115176	1.23432	0.723099	73.8231	0.906016	74.7024	1.22938	102.929	27.8979	73.8231	0.906016
11CAT03 Spot 93	1191.09	104740	1.87298	19.3824	1.90862	0.0820608	2.19795	0.0115407	1.09003	0.49593	73.9698	0.801684	80.0806	1.69251	266.447	43.7962	73.9698	0.801684
11CAT03 Spot 181	213.738	13136.5	1.26558	19.6097	1.71405	0.0811821	2.08988	0.011551	1.19566	0.572121	74.0355	0.880151	79.2557	1.59336	239.616	39.5217	74.0355	0.880151
11CAT03 Spot 23	883.744	169883	1.91179	21.2084	1.10439	0.0751897	1.70643	0.0115706	1.30086	0.762326	74.1605	0.959195	73.6124	1.21169	55.847	26.3188	74.1605	0.959195
11CAT03 Spot 204	230.764	7759.31	2.2206	21.9408	1.53001	0.0728554	2.06052	0.0115985	1.38016	0.66981	74.3384	1.0201	71.4055	1.42079	NA	NA	74.3384	1.0201
11CAT03 Spot 235	574.57	35436	2.06635	21.5532	1.22094	0.0742003	1.88487	0.0116039	1.43598	0.761847	74.3732	1.06185	72.6776	1.322	17.2203	29.3114	74.3732	1.06185
11CAT03 Spot 283	1059.95	16666.2	2.37345	18.4014	1.92723	0.0869291	2.37227	0.0116066	1.38328	0.583105	74.3898	1.02311	84.6387	1.92646	384.323	43.2838	74.3898	1.02311
11CAT03 Spot 20	760.696	32710.4	2.64851	21.2144	1.01724	0.0755691	1.89051	0.0116323	1.59351	0.842897	74.5536	1.18117	73.9706	1.3487	55.147	24.2636	74.5536	1.18117
11CAT03 Spot 226	191.809	9486.04	2.26835	21.0892	1.85357	0.0760812	2.09065	0.0116419	0.967019	0.462544	74.615	0.717382	74.4539	1.50087	69.287	44.101	74.615	0.717382
11CAT03 Spot 9	657.316	32254.2	1.71347	21.2847	1.41883	0.0754249	2.05253	0.0116485	1.48317	0.722607	74.6571	1.1009	73.8345	1.46168	47.2943	33.8859	74.6571	1.1009
11CAT03 Spot 24	972.24	176686	2.34313	19.2281	1.48885	0.0835101	1.90032	0.011651	1.18092	0.62143	74.673	0.876739	81.4397	1.48718	284.711	34.0713	74.673	0.876739
11CAT03 Spot 33	990.835	164463	1.78583	21.2091	1.0794	0.0758148	1.55297	0.0116671	1.11652	0.718957	74.7756	0.830063	74.2025	1.11125	55.7946	25.7324	74.7756	0.830063
11CAT03 Spot 110	1299.22	80447.1	0.647219	21.3852	1.16388	0.0752332	1.75665	0.0116738	1.31575	0.749012	74.8181	0.97873	73.6534	1.24802	35.9869	27.8646	74.8181	0.97873
11CAT03 Spot 15	1002.29	38683.9	1.68866	21.3335	0.892831	0.0756331	1.47228	0.0117075	1.17067	0.795139	75.0328	0.873291	74.031	1.05116	41.8013	21.3515	75.0328	0.873291
11CAT03 Spot 248	797.239	109579	2.38031	21.1909	1.36931	0.0762261	1.78367	0.0117203	1.14301	0.64082	75.1148	0.85359	74.5906	1.28276	57.7987	32.6474	75.1148	0.85359
11CAT03 Spot 252	723.788	66471.3	2.78429	20.6428	1.46655	0.0783005	1.9648	0.0117279	1.30754	0.665483	75.1631	0.97708	76.5458	1.44868	119.938	34.5643	75.1631	0.97708
11CAT03 Spot 222	884.177	24460.4	1.88411	21.0873	1.28408	0.077083	1.97505	0.0117942	1.50066	0.759808	75.5854	1.12766	75.3988	1.43522	69.4701	30.5289	75.5854	1.12766
11CAT03 Spot 187	135.918	11074.4	3.34927	20.7017	2.66254	0.078534	3.04541	0.0117965	1.47832	0.485425	75.5999	1.11108	76.7657	2.25165	113.192	62.8195	75.5999	1.11108
11CAT03 Spot 79	1216.39	67262.8	2.25586	20.7374	1.27451	0.0785287	1.87502	0.011816	1.37526	0.733463	75.7242	1.03531	76.7607	1.38622	109.163	30.1129	75.7242	1.03531
11CAT03 Spot 25	313.249	28164.2	1.69332	21.641	1.86606	0.075341	2.36478	0.0118303	1.45258	0.614258	75.8156	1.09483	73.7552	1.68231	7.46445	44.8985	75.8156	1.09483
11CAT03 Spot 65	588.716	34459	2.91064	21.1568	1.47515	0.0772006	2.14811	0.0118511	1.56151	0.726923	75.9478	1.17898	75.5096	1.56319	61.6606	35.1478	75.9478	1.17898
11CAT03 Spot 78	1169.08	257166	2.93868	21.3179	0.954308	0.0776796	1.4607	0.0120154	1.10587	0.75708	76.9949	0.846395	75.961	1.06907	43.5546	22.8266	76.9949	0.846395
11CAT03 Spot 56	905.524	151909	2.57337	21.6167	1.28601	0.0774947	1.72502	0.0121548	1.14972	0.6665	77.8826	0.890048	75.7868	1.25974	10.1631	30.9396	77.8826	0.890048
11CAT03 Spot 97	476.54	9983.82	2.1027	12.7296	7.08487	0.13491	7.29648	0.0124608	1.74449	0.239086	79.8309	1.38405	128.5	8.80717	1160.12	140.652	79.8309	1.38405
11CAT03 Spot 263	1328.84	835095	4.89224	20.9987	0.958278	0.0835915	1.76139	0.0127362	1.4779	0.839055	81.5847	1.19814	81.5159	1.37969	79.4796	22.7676	81.5847	1.19814
11CAT03 Spot 123	52.5487	1825.41	2.50197	18.3126	5.21286	0.0975311	5.42502	0.0129593	1.5023	0.27692	83.0042	1.23897	94.4948	4.89509	395.179	116.947	83.0042	1.23897
11CAT03 Spot 207	672.193	163001	2.54691	21.7164	0.891822	0.0829355	1.60444	0.0130682	1.33374	0.831284	83.6975	1.1091	80.9011	1.24764	NA	NA	83.6975	1.1091
11CAT03 Spot 67	312.923	34141.6	1.66903	22.0268	1.40755	0.0818029	1.91696	0.013074	1.30137	0.678868	83.7339	1.08264	79.8386	1.47185	NA	NA	83.7339	1.08264
11CAT03 Spot 291	226.736	24970.8	1.85961	21.2557	2.39446	0.0848683	2.86188	0.0130891	1.56746	0.547703	83.8302	1.3055	82.7117	2.27327	50.5137	57.1628	83.8302	1.3055
11CAT03 Spot 311	84.8851	5822.12	2.34375	21.2223	3.63111	0.0851685	3.93944	0.0131147	1.52782	0.387828	83.9933	1.27495	82.9926	3.13941	54.2929	86.6363	83.9933	1.27495
11CAT03 Spot 169	33.8286	54347.8	4.36631	22.3943	4.65209	0.0809085	5.15424	0.0131468	2.21906	0.430532	84.1972	1.85624	78.9988	3.91743	NA	NA	84.1972	1.85624
11CAT03 Spot 287	445.645	35761.1	2.99896	21.4406	1.60496	0.0845627	1.92517	0.0131554	1.06318	0.552255	84.2522	0.889927	82.4256	1.52413	29.8035	38.4471	84.2522	0.889927
11CAT03 Spot 281	78.2044	3684.29	3.31337	22.9595	3.99199	0.0790516	4.20958	0.0131693	1.33589	0.317346	84.3403	1.11936	77.2529	3.1314	NA	NA	84.3403	1.11936
11CAT03 Spot 255	35.2277	7304.28	4.96811	17.9394	5.14232	0.101235	5.39809	0.0131773	1.6419	0.304164	84.3913	1.37659	97.9153	5.03874	441.162	114.462	84.3913	1.37659
11CAT03 Spot 35	723.41	63194	1.87934	21.6644	1.15741	0.0839546	1.82416	0.0131971	1.40995	0.772932	84.5177	1.18388	81.8562	1.43458	4.86273	27.8582	84.5177	1.18388
11CAT03 Spot 83	1136.5	110799	3.189	20.6066	1.2309	0.0882905	1.86424	0.013201	1.4001	0.75103	84.5426	1.17595	85.9096	1.53568	124.046	28.9693	84.5426	1.17595
11CAT03 Spot 268	782.993	118283	3.4362	21.2341	1.57979	0.0857841	1.91467	0.0132169	1.08176	0.564987	84.6434	0.909654	83.5684	1.53598	52.9369	37.7033	84.6434	0.909654
11CAT03 Spot 21	40.5894	1749.56	3.77655	26.9856	4.57931	0.06753	4.84587	0.0132226	1.58505	0.327093	84.6795	1.33344	66.3528	3.11257	NA	NA	84.6795	1.33344
11CAT03 Spot 192	50.33	19611.9	2.67119	24.2391	3.16072	0.0752117	3.57294	0.0132279	1.66605	0.466296	84.7131	1.40213	73.6331	2.53774	NA	NA	84.7131	1.40213
11CAT03 Spot 95	385.45	33948.6	2.37584	20.8141	1.59752	0.0876361	2.1331	0.0132351	1.41353	0.662664	84.7593	1.19026	85.2989	1.74518	100.453	37.7902	84.7593	1.19026
11CAT03 Spot 176	159.939	12060.3	3.01903	21.6451	2.22348	0.0843582	2.47498	0.0132488	1.08704	0.43921	84.8461	0.916264	82.2341	1.95504	7.0026	53.5243	84.8461	0.916264
11CAT03 Spot 4	95.3983	5864.96	4.32916	22.2723	3.77653	0.0820767	4.09647	0.013264	1.5871	0.387431	84.943	1.33929	80.0955	3.15503	NA	NA	84.943	1.33929
11CAT03 Spot 80	108.207	10419.6	2.98653	22.9281	2.63853	0.0798266	2.89034	0.0132801	1.17994	0.408234	85.0459	0.996896	77.9819	2.16957	NA	NA	85.0459	0.996896
11CAT03 Spot 73	326.051	21332.6	3.49799	21.4316	1.53403	0.0855863	2.06633	0.013309	1.38437	0.669966	85.2296	1.17213	83.3835	1.65413	30.7989	36.7638	85.2296	1.17213
11CAT03 Spot 308	1036.02	34404.3	2.56909	21.5246	1.07915	0.085446	1.61383	0.0133449	1.19996	0.743546	85.4577	1.01869	83.2523	1.28995	20.4265	25.9008	85.4577	1.01869
11CAT03 Spot 309	1185.03	41014.5	4.53435	21.1584	1.03748	0.0869854	1.81383	0.0133542	1.48783	0.820267	85.5166	1.26394	84.6912	1.47384	61.5029	24.7427	85.5166	1.26394
11CAT03 Spot 278	57.4262	323243	2.4325	20.7724	4.46806	0.088804	4.70664	0.0133847	1.47949	0.314341	85.7107	1.25969	86.3886	3.89785	105.141	105.616	85.7107	1.25969
11CAT03 Spot 264	148.21	2270.67	2.07955	24.34	3.3323	0.0758516	3.88441	0.0133959	1.99608	0.513871	85.7825	1.70095	74.2372	2.78079	NA	NA	85.7825	1.70095
11CAT03 Spot 146	2724.95	147098	3.16079	20.868	0.892313	0.0886165	1.51685	0.0134178	1.22662	0.808666	85.9217	1.04694	86.2137	1.25375	94.3015	21.1339	85.9217	1.04694
11CAT03 Spot 85	1396.93	37156.5	2.67804	18.915	2.94985	0.0980647	3.17815	0.0134588	1.18282	0.372171	86.1824	1.01259	94.9883	2.88198	322.174	67.0224	86.1824	1.01259
11CAT03 Spot 106	1866.12	41909.6	5.51274	21.1655	1.19084	0.0881606	1.7517	0.0135391	1.28467	0.733383	86.6932	1.10627	85.7884	1.44103	60.7025	28.3942	86.6932	1.10627
11CAT03 Spot 200	83.5743	15268.3	3.12502	20.97	3.43349	0.0890974	3.68941	0.0135566	1.35015	0.365951	86.8045	1.16413	86.6622	3.06469	82.7205	81.479	86.8045	1.16413
11CAT03 Spot 239	1622.59	178864	4.4583	18.2978	3.16571	0.102156	3.43059	0.0135628	1.32184	0.385309	86.844	1.14024	98.7647	3.22866	396.995	70.9844	86.844	1.14024
11CAT03 Spot 266	1953.52	1.67474e+06	3.07719	21.0786	0.952125	0.0890244	1.54797	0.0136156	1.22052	0.788465	87.1799	1.05689	86.5941	1.28489	70.4921	22.6246	87.1799	1.05689
11CAT03 Spot 68	192.683	9518.94	5.29245	22.382	2.41161	0.0841906	2.9266	0.0136726	1.65805	0.566545	87.5419	1.44168	82.0772	2.30755	NA	NA	87.5419	1.44168
11CAT03 Spot 236	435.935	153786	7.84858	20.9656	1.35911	0.0900396	1.80691	0.0136971	1.19069	0.658966	87.698	1.03714	87.5402	1.51551	83.2181	32.2676	87.698	1.03714
11CAT03 Spot 153	222.632	12737.9	3.10583	21.5236	1.84501	0.087775	2.46066	0.013708	1.62812	0.66166	87.7672	1.41927	85.4286	2.01611	20.5629	44.3024	87.7672	1.41927
11CAT03 Spot 130	72.2617	2281.8	2.11763	22.584	3.89724	0.0836551	4.21943	0.0137082	1.61713	0.383258	87.7686	1.40971	81.5756	3.3074	NA	NA	87.7686	1.40971
11CAT03 Spot 280	1135.45	407982	3.58247	21.4847	1.17211	0.0881796	1.74256	0.0137463	1.28945	0.739972	88.0107	1.12714	85.8061	1.43379	24.8628	28.098	88.0107	1.12714
11CAT03 Spot 213	72.6717	2330.53	2.22904	22.6415	5.49046	0.0837229	5.75637	0.0137543	1.72933	0.300421	88.0615	1.51252	81.6391	4.51552	NA	NA	88.0615	1.51252
11CAT03 Spot 260	140.3	12904	3.07474	21.7026	2.28861	0.0874988	2.83925	0.0137785	1.68036	0.591833	88.2153	1.47224	85.1707	2.31957	NA	NA	88.2153	1.47224
11CAT03 Spot 205	748.905	18801.2	1.9757	21.2351	1.05779	0.0898051	1.72413	0.013837	1.3615	0.789677	88.5876	1.19788	87.3218	1.44262	52.8641	25.2216	88.5876	1.19788
11CAT03 Spot 195	242.627	117643	1.34658	20.8644	1.43357	0.0914428	2.10644	0.0138434	1.54336	0.732687	88.6284	1.3585	88.8465	1.79196	94.7066	33.9596	88.6284	1.3585
11CAT03 Spot 31	164.21	33840.1	2.46477	20.5543	1.98455	0.09373	2.38059	0.0139788	1.31483	0.552312	89.489	1.1685	90.9721	2.07149	130.034	46.6866	89.489	1.1685
11CAT03 Spot 57	170.42	132732	4.02249	20.5504	2.44359	0.0938971	2.84161	0.014001	1.45038	0.510409	89.6303	1.29099	91.1272	2.47668	130.509	57.4611	89.6303	1.29099
11CAT03 Spot 270	98.0217	122147	1.95499	19.8026	3.25058	0.0975635	3.57758	0.0140184	1.49427	0.417675	89.7407	1.33168	94.5247	3.22908	216.984	75.2702	89.7407	1.33168
11CAT03 Spot 240	57.9658	3149.81	2.39971	22.5527	3.49049	0.0861942	3.79783	0.0141047	1.49668	0.394088	90.2896	1.34193	83.9519	3.06012	NA	NA	90.2896	1.34193
11CAT03 Spot 88	561.899	15901.2	5.07793	21.4079	1.3833	0.0914293	1.87388	0.0142019	1.26408	0.674579	90.9075	1.14108	88.834	1.5939	33.4685	33.1227	90.9075	1.14108
11CAT03 Spot 136	85.0837	13328.7	2.38682	20.9562	2.90828	0.093494	3.35934	0.0142162	1.68138	0.500511	90.9981	1.51928	90.753	2.91643	84.2885	69.0011	90.9981	1.51928
11CAT03 Spot 241	214.605	5930.61	2.04398	22.2544	1.31402	0.088135	1.96926	0.0142315	1.46674	0.744821	91.0956	1.32674	85.7645	1.61957	NA	NA	91.0956	1.32674
11CAT03 Spot 118	94.8904	11540	3.987	18.9584	2.96566	0.104259	4.21243	0.0143417	2.99155	0.710173	91.7961	2.72667	100.7	4.03837	316.922	67.4442	91.7961	2.72667
11CAT03 Spot 17	62.7068	3104.38	2.82645	22.1626	4.19173	0.0892469	4.46791	0.0143516	1.54649	0.346132	91.8589	1.41051	86.8016	3.71709	NA	NA	91.8589	1.41051
11CAT03 Spot 210	30.576	5079.24	2.37154	22.6701	4.64424	0.0873907	4.87225	0.014375	1.47302	0.302329	92.0073	1.34566	85.0698	3.97595	NA	NA	92.0073	1.34566
11CAT03 Spot 300	44.6414	2378.26	3.17136	23.3896	6.31675	0.0855417	6.45768	0.0145174	1.34176	0.207778	92.9125	1.23772	83.3418	5.16704	NA	NA	92.9125	1.23772
11CAT03 Spot 223	88.4491	40473.2	4.05699	19.6573	2.66778	0.107826	3.20667	0.0153793	1.77924	0.554855	98.3866	1.73724	103.975	3.16911	234.033	61.5901	98.3866	1.73724
11CAT03 Spot 202	570.697	50113.3	13.4959	19.2912	1.41439	0.125864	2.32254	0.0176177	1.8422	0.793182	112.582	2.05598	120.374	2.63639	277.259	32.3887	112.582	2.05598
11CAT03 Spot 129	191.059	23774.8	2.02888	20.8137	1.44462	0.143572	2.24124	0.0216824	1.71354	0.76455	138.28	2.34425	136.22	2.8571	100.478	34.1748	138.28	2.34425
11CAT03 Spot 214	692.963	51198.3	9.10368	17.6032	2.4641	0.17822	3.3849	0.0227633	2.32072	0.68561	145.096	3.32967	166.527	5.19886	483.14	54.4297	145.096	3.32967
11CAT03 Spot 112	1285.04	113418	1.93494	20.5444	1.1041	0.159901	1.74483	0.0238359	1.35107	0.77433	151.854	2.02768	150.616	2.44238	131.198	25.9738	151.854	2.02768
11CAT03 Spot 244	631.009	149121	3.07593	19.887	0.94729	0.165226	2.01869	0.0238416	1.78262	0.88306	151.889	2.67597	155.268	2.90649	207.119	21.9709	151.889	2.67597
11CAT03 Spot 53	52.003	5963.63	2.95998	23.4493	4.40497	0.164124	4.67227	0.0279248	1.55767	0.333387	177.547	2.72787	154.307	6.68863	NA	NA	177.547	2.72787
11CAT03 Spot 58	59.0864	47195.1	2.35137	20.4021	2.58787	0.195456	2.83755	0.0289342	1.16388	0.410171	183.874	2.10985	181.274	4.71076	147.518	60.6761	183.874	2.10985
11CAT03 Spot 206	40.3567	8213.07	1.03155	24.2113	3.49179	0.181529	3.81143	0.0318897	1.52789	0.40087	202.364	3.04387	169.375	5.94599	NA	NA	202.364	3.04387
11CAT03 Spot 224	442.294	37865.3	1.85209	19.8302	1.08059	0.237736	1.74343	0.0342066	1.36817	0.784753	216.823	2.91716	216.565	3.4002	213.789	25.0317	216.823	2.91716
11CAT03 Spot 102	553.697	108797	17.4762	16.5101	1.59588	0.332606	2.92556	0.0398443	2.45195	0.838115	251.868	6.0566	291.553	7.41438	623.006	34.4022	251.868	6.0566
11CAT03 Spot 257	304.543	32707.6	5.21901	19.3417	0.995455	0.344565	1.62441	0.0483564	1.28366	0.79023	304.423	3.81692	300.625	4.22686	271.218	22.8035	304.423	3.81692
11CAT03 Spot 140	904.279	1.18909e+06	13.2676	7.61561	1.1894	0.88239	2.43759	0.0487588	2.12772	0.872876	306.897	6.3769	642.273	11.6028	2114.77	20.8548	306.897	6.3769
11CAT03 Spot 152	700.151	84688	2.60308	18.6825	1.18477	0.374771	1.88228	0.0508031	1.46263	0.777053	319.45	4.5585	323.184	5.2102	350.156	26.7773	319.45	4.5585
11CAT03 Spot 94	131.223	518437	2.33081	18.9325	1.38107	0.370324	1.81602	0.0508718	1.17923	0.649346	319.872	3.67996	319.894	4.98326	320.077	31.3879	319.872	3.67996
11CAT03 Spot 271	592.096	74954	2.91831	18.1668	1.34359	0.386636	1.93284	0.0509647	1.38947	0.718877	320.442	4.34359	331.909	5.47229	413.072	30.037	320.442	4.34359
11CAT03 Spot 220	855.875	153363	1.30282	16.4807	0.821548	0.526573	2.16532	0.0629683	2.00341	0.925228	393.652	7.65049	429.532	7.58403	626.845	17.7286	393.652	7.65049
11CAT03 Spot 228	814.088	136171	2.9456	18.3541	0.758327	0.475753	1.6391	0.0633582	1.45313	0.886541	396.016	5.58142	395.155	5.36545	390.096	17.0211	396.016	5.58142
11CAT03 Spot 170	224.621	90488.1	1.74614	16.5195	0.895282	0.758342	1.64261	0.0908969	1.37718	0.838413	560.839	7.39734	573.053	7.19338	621.78	19.3338	560.839	7.39734
11CAT03 Spot 197	887.036	240037	1.83528	16.2817	0.746741	0.803972	1.5098	0.094979	1.31221	0.869124	584.916	7.3374	599.067	6.83232	653.01	16.024	584.916	7.3374
11CAT03 Spot 55	325.171	551215	2.70967	16.1682	0.803301	0.909271	1.77596	0.10667	1.5839	0.891856	653.38	9.84174	656.67	8.58815	667.974	17.1969	653.38	9.84174
11CAT03 Spot 161	124.03	28950.8	2.42589	16.0809	1.13374	0.942446	1.7034	0.109965	1.27129	0.746328	672.544	8.11911	674.161	8.39195	679.55	24.233	672.544	8.11911
11CAT03 Spot 247	196.376	65907.4	1.95953	15.5945	0.843449	0.998126	1.61346	0.112939	1.37545	0.852481	689.796	8.99779	702.858	8.1839	744.815	17.8107	689.796	8.99779
11CAT03 Spot 194	28.9102	5514.02	2.73474	17.4434	1.78797	0.900204	2.28683	0.113936	1.42575	0.623461	695.564	9.40073	651.837	11.0007	503.206	39.3443	695.564	9.40073
11CAT03 Spot 90	154.221	67997.8	0.946933	15.3257	0.990422	1.21517	1.82886	0.135128	1.53746	0.840668	817.052	11.7984	807.564	10.1872	781.475	20.8138	817.052	11.7984
11CAT03 Spot 10	687.54	421544	1.26668	14.709	0.772922	1.33639	1.59254	0.142627	1.39239	0.874325	859.503	11.2042	861.661	9.24952	867.224	16.0232	859.503	11.2042
11CAT03 Spot 262	118.263	93760.2	1.33143	14.1265	0.897776	1.56192	1.55678	0.160097	1.27184	0.816966	957.316	11.3146	955.23	9.63751	950.426	18.3616	950.426	18.3616
11CAT03 Spot 114	65.5956	57396.8	0.779285	13.6763	0.909543	1.73411	1.58035	0.17208	1.29238	0.817779	1023.56	12.2316	1021.28	10.1779	1016.36	18.4249	1016.36	18.4249
11CAT03 Spot 36	366.085	877661	2.03436	8.49561	0.604262	4.97637	1.43052	0.306757	1.29663	0.906406	1724.73	19.6216	1815.32	12.0954	1920.92	10.8334	1920.92	10.8334
11CAT03 Spot 256	403.616	396333	2.37451	8.26292	0.973607	5.77846	1.60105	0.346444	1.271	0.793855	1917.59	21.0819	1943.19	13.8593	1970.56	17.3548	1970.56	17.3548
11CAT03 Spot 272	517.956	4.16297e+06	1.43403	7.52061	0.782462	6.34099	1.26184	0.346017	0.989951	0.784527	1915.55	16.4051	2024.14	11.0676	2136.75	13.6848	2136.75	13.6848
11CAT03 Spot 290	702.706	1.2795e+08	7.50375	5.79019	0.820379	10.0524	1.62119	0.422328	1.3983	0.862513	2271.04	26.7652	2439.61	14.973	2583.3	13.6956	2583.3	13.6956
11CAT03 Spot 63	112.156	226294	1.4623	5.59775	0.739616	12.1246	1.67167	0.492459	1.49915	0.896797	2581.31	31.8885	2614.09	15.6818	2639.58	12.2804	2639.58	12.2804
11CAT03 Spot 41	234.959	359150	2.3381	4.94488	0.611154	13.0216	1.20925	0.467205	1.04344	0.862885	2471.29	21.4193	2681.22	11.4033	2843.55	9.96093	2843.55	9.96093
11 CAT 09 Element 2
11CAT09 Spot 209	1273.86	114532	1.16996	21.0301	1.26553	0.0217189	1.72522	0.00331411	1.17253	0.679641	21.3288	0.249673	21.8169	0.372375	75.9283	30.0613	21.3288	0.249673
11CAT09 Spot 276	560.806	37479.7	1.68719	20.4221	2.10512	0.0228589	2.51287	0.00338723	1.37222	0.546078	21.7986	0.29862	22.9493	0.570217	145.185	49.4056	21.7986	0.29862
11CAT09 Spot 251	475.892	24968.9	2.3353	21.5123	2.34824	0.0217537	2.8848	0.00339553	1.67567	0.580862	21.8519	0.365547	21.8515	0.623639	21.7907	56.3524	21.8519	0.365547
11CAT09 Spot 280	1968.96	268144	0.752464	20.8874	1.71794	0.0226625	2.15524	0.00343463	1.30145	0.603853	22.1031	0.287169	22.7543	0.484956	92.1039	40.6767	22.1031	0.287169
11CAT09 Spot 55	375.823	5319.04	1.094	23.1485	3.83821	0.0208667	3.99583	0.00350481	1.1112	0.278091	22.5539	0.250182	20.9696	0.829318	NA	NA	22.5539	0.250182
11CAT09 Spot 217	399.511	10922.3	1.69673	21.4887	1.31695	0.0448468	1.85375	0.00699247	1.30461	0.70377	44.9195	0.583988	44.5452	0.807904	24.4485	31.5788	44.9195	0.583988
11CAT09 Spot 84	503.215	9654.77	1.82343	22.3862	1.50815	0.0447083	2.08606	0.007262	1.44123	0.690884	46.6447	0.669831	44.4105	0.906464	NA	NA	46.6447	0.669831
11CAT09 Spot 268	149.092	2132.22	2.10646	25.303	2.38929	0.0397683	2.70878	0.00730123	1.27623	0.471147	46.8958	0.596327	39.5978	1.05197	NA	NA	46.8958	0.596327
11CAT09 Spot 216	314.143	49386.5	2.30701	21.2002	1.99014	0.0477193	2.39853	0.00734043	1.33876	0.558159	47.1467	0.628879	47.3328	1.10924	56.7831	47.4667	47.1467	0.628879
11CAT09 Spot 240	422.598	13246.4	0.869663	18.9543	2.11067	0.053534	2.54569	0.00736249	1.42323	0.559075	47.2878	0.670552	52.9525	1.31346	317.414	47.9924	47.2878	0.670552
11CAT09 Spot 259	377.381	8870.12	2.30033	19.4155	2.46044	0.0529551	2.83339	0.00746011	1.40511	0.49591	47.9125	0.670725	52.3944	1.44689	262.501	56.5177	47.9125	0.670725
11CAT09 Spot 230	384.669	15049.8	1.14483	20.6308	1.68028	0.0499602	2.09499	0.00747874	1.25125	0.597257	48.0317	0.59876	49.5022	1.01219	121.312	39.6096	48.0317	0.59876
11CAT09 Spot 16	444.097	40132.6	2.38674	20.8288	1.67706	0.0497726	2.08324	0.00752217	1.23587	0.593242	48.3095	0.59481	49.3208	1.00292	98.7468	39.6786	48.3095	0.59481
11CAT09 Spot 54	518.77	64029.2	1.23737	21.5502	1.63439	0.048214	2.07346	0.00753896	1.27593	0.615362	48.417	0.615452	47.8121	0.968387	17.5605	39.2439	48.417	0.615452
11CAT09 Spot 164	122.045	4031.54	2.11596	21.9842	3.82022	0.0475088	4.02203	0.00757829	1.25805	0.312791	48.6686	0.609972	47.1287	1.85222	NA	NA	48.6686	0.609972
11CAT09 Spot 117	688.801	502256	1.20111	21.1044	1.07266	0.0498201	1.86621	0.00762898	1.52713	0.818307	48.9929	0.74535	49.3668	0.899251	67.5825	25.5066	48.9929	0.74535
11CAT09 Spot 65	465.474	9.1382e+06	1.85942	21.6162	1.45723	0.0487451	1.93043	0.00764536	1.26611	0.655868	49.0977	0.619269	48.3265	0.911056	10.2514	35.0589	49.0977	0.619269
11CAT09 Spot 177	187.428	9254.84	2.23964	21.4101	2.3861	0.0492454	2.62912	0.0076502	1.10398	0.419906	49.1287	0.540311	48.8107	1.25294	33.198	57.1531	49.1287	0.540311
11CAT09 Spot 201	241.86	6371.61	2.1272	22.1914	1.92897	0.0476946	2.36328	0.00767965	1.36534	0.57773	49.3171	0.670775	47.3088	1.09239	NA	NA	49.3171	0.670775
11CAT09 Spot 273	740.323	32299.8	1.10368	18.2733	1.47685	0.0579977	1.79989	0.00768982	1.02884	0.571614	49.3821	0.506122	57.2454	1.00185	399.992	33.0925	49.3821	0.506122
11CAT09 Spot 241	231.266	12239.4	1.49342	21.155	2.42887	0.0501043	2.82321	0.00769086	1.43914	0.509752	49.3888	0.708057	49.6415	1.36778	61.8675	57.8742	49.3888	0.708057
11CAT09 Spot 220	260.287	53488.7	1.56052	20.5139	1.9239	0.0517697	2.25905	0.0077057	1.18403	0.524127	49.4837	0.583659	51.2506	1.12904	134.677	45.1985	49.4837	0.583659
11CAT09 Spot 305	3184	514438	1.0523	21.0676	0.912793	0.0504722	1.52841	0.00771535	1.22591	0.802081	49.5454	0.605055	49.9972	0.745656	71.7327	21.7084	49.5454	0.605055
11CAT09 Spot 108	226.411	5660.74	1.43207	21.6228	1.76848	0.0493979	2.1817	0.00775011	1.27761	0.585603	49.7678	0.63339	48.9583	1.04278	9.50705	42.5486	49.7678	0.63339
11CAT09 Spot 215	290.547	139412	1.35235	20.9085	2.0112	0.0512814	2.26268	0.00777984	1.03673	0.458185	49.958	0.515926	50.7791	1.12071	89.7327	47.665	49.958	0.515926
11CAT09 Spot 44	222.775	7286.81	1.03119	21.9264	2.64592	0.0491972	3.1758	0.007827	1.75635	0.553043	50.2597	0.879305	48.7641	1.51205	NA	NA	50.2597	0.879305
11CAT09 Spot 159	319.34	53974.2	1.49496	21.0573	2.06972	0.051328	2.37003	0.00784234	1.15469	0.487204	50.3578	0.579209	50.8242	1.1749	72.8843	49.2132	50.3578	0.579209
11CAT09 Spot 179	227.481	44268	1.23714	15.0337	5.38902	0.0719129	5.55646	0.00784442	1.3538	0.243645	50.3711	0.679267	70.513	3.7851	821.803	112.584	50.3711	0.679267
11CAT09 Spot 124	279.239	6780.67	2.38784	21.7536	2.10899	0.0503017	2.57582	0.00793966	1.47886	0.574131	50.9802	0.750952	49.8324	1.25261	NA	NA	50.9802	0.750952
11CAT09 Spot 226	98.5909	5469.47	2.44427	22.0555	3.57832	0.0496498	3.81709	0.00794552	1.32884	0.34813	51.0177	0.67527	49.202	1.83331	NA	NA	51.0177	0.67527
11CAT09 Spot 205	107.743	4729.33	0.943709	22.3974	3.57208	0.0493434	3.95298	0.00801889	1.693	0.428286	51.487	0.868204	48.9056	1.88741	NA	NA	51.487	0.868204
11CAT09 Spot 154	167.782	8695.67	1.87802	21.7942	2.12102	0.0507463	2.65667	0.00802478	1.59974	0.60216	51.5246	0.820974	50.2622	1.30279	NA	NA	51.5246	0.820974
11CAT09 Spot 51	193.872	13426.4	2.20905	21.1653	1.78035	0.0527002	2.33145	0.00809327	1.50533	0.645663	51.9626	0.779063	52.1485	1.18512	60.7149	42.4227	51.9626	0.779063
11CAT09 Spot 218	151.107	7544.65	1.23307	21.4444	2.38966	0.0524883	2.76058	0.00816704	1.38215	0.500674	52.4343	0.721781	51.9441	1.3979	29.3653	57.2881	52.4343	0.721781
11CAT09 Spot 43	2306.39	213864	1.0185	20.4341	1.28608	0.0551846	1.88469	0.00818203	1.3777	0.730995	52.5301	0.720766	54.5421	1.00083	143.835	30.1735	52.5301	0.720766
11CAT09 Spot 125	99.601	7878.98	0.990548	20.5593	2.6402	0.0554097	3.03633	0.00826575	1.49954	0.493865	53.0655	0.79247	54.7586	1.61862	129.5	62.1212	53.0655	0.79247
11CAT09 Spot 46	567.086	30817	0.735641	21.5303	1.25842	0.0530868	1.7638	0.00829326	1.23586	0.700683	53.2414	0.655279	52.5214	0.902819	19.7801	30.2066	53.2414	0.655279
11CAT09 Spot 147	904.679	34537.7	0.590208	21.598	0.985937	0.0538399	1.57593	0.00843733	1.22943	0.780127	54.1623	0.663098	53.2473	0.817518	12.2584	23.6876	54.1623	0.663098
11CAT09 Spot 174	1641.46	55232.8	0.989747	21.5832	0.942673	0.0540061	1.48369	0.00845759	1.14574	0.772219	54.2919	0.61943	53.4074	0.771923	13.8927	22.6396	54.2919	0.61943
11CAT09 Spot 243	264.488	26008.1	1.19775	21.6704	1.64044	0.0538054	2.17939	0.00846018	1.43482	0.658358	54.3084	0.775955	53.214	1.12988	4.22686	39.5058	54.3084	0.775955
11CAT09 Spot 80	1133.4	114310	0.90381	21.6515	1.11893	0.053921	1.56365	0.00847098	1.09224	0.698518	54.3775	0.591432	53.3254	0.812305	6.30617	26.9393	54.3775	0.591432
11CAT09 Spot 294	811.432	1.06283e+06	1.0809	20.7758	1.08217	0.0563051	1.39504	0.00848778	0.880367	0.631071	54.4848	0.477645	55.6197	0.755048	104.769	25.5995	54.4848	0.477645
11CAT09 Spot 8	1069.85	40523.8	1.77233	20.8558	1.24498	0.0561796	1.62099	0.00850146	1.0381	0.640411	54.5723	0.564124	55.4991	0.875492	95.6799	29.4591	54.5723	0.564124
11CAT09 Spot 126	1233.31	47382.2	1.35577	19.9744	1.27723	0.0587517	1.65827	0.00851493	1.05761	0.637782	54.6584	0.575631	57.9688	0.934354	196.941	29.6893	54.6584	0.575631
11CAT09 Spot 310	1174.51	1.87644e+06	1.30665	21.4096	0.922755	0.0549203	1.58398	0.00853158	1.28745	0.812792	54.7648	0.702082	54.2876	0.837323	33.255	22.1055	54.7648	0.702082
11CAT09 Spot 165	1029.31	920796	1.9762	21.2603	1.1306	0.0559965	1.85796	0.0086381	1.47437	0.793541	55.4457	0.813969	55.323	1.00038	49.9919	26.9736	55.4457	0.813969
11CAT09 Spot 169	798.352	24229.5	0.939543	21.7457	1.17765	0.054843	1.67055	0.0086533	1.18486	0.709262	55.5428	0.655277	54.2132	0.881909	NA	NA	55.5428	0.655277
11CAT09 Spot 24	770.235	516195	2.22924	20.902	1.17346	0.0572196	1.68138	0.00867799	1.20417	0.716181	55.7006	0.66784	56.4984	0.924005	90.4753	27.8021	55.7006	0.66784
11CAT09 Spot 311	621.765	141675	1.69564	20.9156	0.885948	0.0572725	1.48881	0.0086917	1.19651	0.803672	55.7882	0.664632	56.5492	0.818894	88.9271	20.9851	55.7882	0.664632
11CAT09 Spot 152	666.487	17969.9	1.14363	21.8699	1.36094	0.0548068	1.86337	0.00869698	1.27279	0.683058	55.8219	0.70743	54.1785	0.983087	NA	NA	55.8219	0.70743
11CAT09 Spot 219	1711.71	11298.7	1.40065	14.0523	4.32596	0.0853529	4.45003	0.00870268	1.04347	0.234486	55.8584	0.580347	83.1651	3.55338	961.222	88.4152	55.8584	0.580347
11CAT09 Spot 232	1255.84	115808	2.04842	21.8119	1.01753	0.0549921	1.61788	0.00870325	1.25784	0.777463	55.862	0.699622	54.3568	0.856305	NA	NA	55.862	0.699622
11CAT09 Spot 239	489.673	34973.7	2.03764	21.119	1.54557	0.0568196	1.97473	0.00870681	1.22913	0.62243	55.8847	0.683928	56.1142	1.07804	65.9432	36.806	55.8847	0.683928
11CAT09 Spot 271	543.303	15156.7	1.71576	21.1724	1.29728	0.0566952	1.94102	0.0087097	1.44382	0.743846	55.9033	0.803653	55.9946	1.05744	59.9195	30.9316	55.9033	0.803653
11CAT09 Spot 156	600.557	76027	1.91214	21.6044	1.27808	0.0555986	1.83781	0.00871551	1.32062	0.718585	55.9404	0.735564	54.9403	0.982868	11.5445	30.7181	55.9404	0.735564
11CAT09 Spot 73	773.943	269334	2.08574	21.2927	0.95252	0.0565007	1.70016	0.00872918	1.40829	0.828323	56.0277	0.785611	55.8077	0.923221	46.3855	22.7492	56.0277	0.785611
11CAT09 Spot 144	663.626	45142.6	6.3669	21.4878	1.02154	0.0560437	1.71498	0.00873789	1.37754	0.803239	56.0834	0.76922	55.3684	0.924131	24.5636	24.4973	56.0834	0.76922
11CAT09 Spot 29	623.77	46278.2	3.24358	19.5192	1.38463	0.0617698	1.95553	0.00874836	1.3809	0.706151	56.1503	0.772011	60.8591	1.15515	250.237	31.8805	56.1503	0.772011
11CAT09 Spot 17	757.828	29832.1	1.62091	21.2241	1.19338	0.0572873	1.78066	0.00882217	1.32159	0.742188	56.622	0.745031	56.5634	0.979663	54.107	28.4635	56.622	0.745031
11CAT09 Spot 234	590.282	151423	1.19673	21.0336	0.981228	0.0579832	1.66243	0.00884921	1.34196	0.80723	56.7947	0.758818	57.2315	0.925118	75.5247	23.3084	56.7947	0.758818
11CAT09 Spot 208	591.345	12924.9	2.43627	16.8023	4.47873	0.0726902	4.69336	0.00886199	1.40309	0.298952	56.8764	0.794516	71.2491	3.22937	585.093	97.2664	56.8764	0.794516
11CAT09 Spot 132	949.101	49653.6	1.19443	21.7525	1.00931	0.0562518	1.59239	0.00887838	1.23167	0.77347	56.9811	0.698724	55.5685	0.861089	NA	NA	56.9811	0.698724
11CAT09 Spot 18	1326.8	76513.2	1.18611	21.2003	0.962337	0.0582282	1.34756	0.008957	0.943299	0.700008	57.4835	0.539831	57.4666	0.752888	56.7791	22.9465	57.4835	0.539831
11CAT09 Spot 0	327.521	51119.7	2.03025	21.7156	1.95989	0.0570296	2.55824	0.00898586	1.6442	0.642708	57.6678	0.943945	56.3159	1.40147	NA	NA	57.6678	0.943945
11CAT09 Spot 298	1425.39	8127.44	1.43705	11.376	10.3349	0.1122	10.5667	0.00926123	2.20125	0.20832	59.427	1.30213	107.976	10.8242	1379.54	199.153	59.427	1.30213
11CAT09 Spot 295	943.972	95512	0.704519	21.3905	1.04263	0.0606986	1.64374	0.00942078	1.27076	0.773087	60.446	0.764531	59.8342	0.955103	35.3974	24.9712	60.446	0.764531
11CAT09 Spot 245	608.888	7169.66	1.68234	11.5382	2.82016	0.114919	3.0542	0.00962088	1.17253	0.383908	61.7237	0.720276	110.455	3.1965	1352.28	54.4161	61.7237	0.720276
11CAT09 Spot 308	381.044	3837.86	1.65597	8.14449	3.89374	0.167356	4.05694	0.0098899	1.13909	0.280776	63.4412	0.719108	157.121	5.90568	1996.26	69.2272	63.4412	0.719108
11CAT09 Spot 151	1574.62	68356.4	1.51868	19.7157	1.63096	0.0788305	1.94037	0.011277	1.05119	0.541748	72.2895	0.755658	77.0448	1.43965	227.178	37.6794	72.2895	0.755658
11CAT09 Spot 193	278.917	8963.81	2.05747	21.7842	1.93647	0.0718394	2.36196	0.0113551	1.35237	0.572563	72.7873	0.978816	70.4434	1.60744	NA	NA	72.7873	0.978816
11CAT09 Spot 262	136.006	13041.5	1.93597	19.6281	2.23666	0.080132	2.76206	0.0114123	1.6206	0.586735	73.1516	1.17879	78.269	2.08062	237.431	51.5981	73.1516	1.17879
11CAT09 Spot 190	331.764	14496.2	1.41939	21.3729	1.34649	0.0738398	1.63819	0.011451	0.933077	0.569578	73.3981	0.680977	72.3367	1.14379	37.3652	32.2221	73.3981	0.680977
11CAT09 Spot 120	617.876	238151	1.3354	21.2761	1.1842	0.0745103	2.30389	0.0115026	1.97625	0.857791	73.7273	1.44874	72.9705	1.62217	48.2432	28.2855	73.7273	1.44874
11CAT09 Spot 116	363.225	24831.5	3.12294	22.1213	1.64685	0.0717588	2.04669	0.0115179	1.21525	0.593764	73.825	0.892043	70.3671	1.39143	NA	NA	73.825	0.892043
11CAT09 Spot 282	327.782	53220.4	2.33256	21.3199	1.41207	0.0744879	1.99796	0.0115228	1.41347	0.707455	73.856	1.03797	72.9493	1.40637	43.3547	33.7512	73.856	1.03797
11CAT09 Spot 70	694.517	275548	1.7279	21.2993	1.31111	0.0751523	1.81073	0.0116144	1.2489	0.689719	74.4395	0.924326	73.577	1.28516	45.6369	31.323	74.4395	0.924326
11CAT09 Spot 303	199.77	11049.3	1.27774	22.6087	1.96165	0.0709404	2.33941	0.0116374	1.27467	0.544867	74.5864	0.945251	69.5914	1.57349	NA	NA	74.5864	0.945251
11CAT09 Spot 95	522.092	27942.4	1.86108	21.6393	1.40245	0.0741428	2.1549	0.0116413	1.63607	0.759233	74.611	1.21365	72.6232	1.5103	7.64958	33.7572	74.611	1.21365
11CAT09 Spot 53	609.12	144631	1.64383	20.6944	1.21386	0.0780699	1.83802	0.0117226	1.38017	0.750901	75.1292	1.03089	76.3287	1.3515	114.058	28.6276	75.1292	1.03089
11CAT09 Spot 72	448.249	57227.4	1.29388	20.6969	1.42406	0.0780889	1.87272	0.0117269	1.21619	0.649428	75.1566	0.908741	76.3466	1.37733	113.746	33.6213	75.1566	0.908741
11CAT09 Spot 258	374.914	20328.2	2.53018	21.6516	1.22925	0.0751286	1.77034	0.0118027	1.27399	0.719629	75.6399	0.958009	73.5547	1.25612	6.30048	29.5723	75.6399	0.958009
11CAT09 Spot 275	1877.02	202523	3.84822	20.9409	0.900183	0.0777083	1.35421	0.0118073	1.0117	0.747083	75.6688	0.761068	75.9881	0.991473	86.066	21.3548	75.6688	0.761068
11CAT09 Spot 77	421.238	11148.9	1.16245	14.5285	5.46932	0.112648	5.71098	0.011875	1.6437	0.287814	76.1	1.2435	108.385	5.87098	892.774	113.007	76.1	1.2435
11CAT09 Spot 89	1611.08	66348.2	1.01526	21.2621	0.878367	0.0770473	1.36775	0.0118864	1.04844	0.76654	76.1729	0.793926	75.3651	0.993484	49.8431	20.9872	76.1729	0.793926
11CAT09 Spot 109	190.343	19065.1	1.89687	19.6053	1.72813	0.0842181	2.12815	0.0119803	1.24202	0.583614	76.7709	0.947855	82.1029	1.6785	240.116	39.8559	76.7709	0.947855
11CAT09 Spot 244	170.671	54932.8	1.75817	20.9493	1.95969	0.078858	2.39189	0.0119868	1.37141	0.573356	76.8125	1.04716	77.0707	1.77523	85.1093	46.5017	76.8125	1.04716
11CAT09 Spot 267	414.726	18475.8	2.5569	21.5127	1.44085	0.0770307	1.95128	0.0120239	1.31584	0.67435	77.0489	1.00781	75.3495	1.41705	21.7642	34.5746	77.0489	1.00781
11CAT09 Spot 64	119.626	7964.09	8.49189	20.0882	2.81454	0.0834587	2.95251	0.0121647	0.892014	0.30212	77.9455	0.691098	81.3915	2.30931	183.717	65.5577	77.9455	0.691098
11CAT09 Spot 61	545.175	57417.8	1.25198	21.2462	1.11226	0.0799279	1.70932	0.0123216	1.29794	0.759334	78.9447	1.01841	78.0771	1.28457	51.6277	26.5289	78.9447	1.01841
11CAT09 Spot 11	1861.23	1.37018e+06	3.78147	21.045	0.788747	0.0808319	1.53134	0.0123429	1.31258	0.857147	79.0806	1.03166	78.9267	1.16285	74.2529	18.7481	79.0806	1.03166
11CAT09 Spot 175	1467.4	243256	3.75187	20.2826	1.01889	0.083949	1.49503	0.0123546	1.09406	0.731799	79.1546	0.860705	81.8509	1.17567	161.267	23.8272	79.1546	0.860705
11CAT09 Spot 270	1376.5	168029	3.52485	21.1124	0.789462	0.0809322	1.50026	0.0123979	1.27575	0.850351	79.4304	1.00711	79.021	1.14057	66.6478	18.7932	79.4304	1.00711
11CAT09 Spot 128	208.53	17935.9	2.19251	21.0875	1.81912	0.0812217	2.41437	0.0124275	1.58745	0.657499	79.6194	1.25614	79.2929	1.84159	69.4613	43.2985	79.6194	1.25614
11CAT09 Spot 79	184.392	11326.6	2.85038	21.2527	1.84172	0.0834855	2.18894	0.012874	1.18302	0.540453	82.4614	0.969322	81.4167	1.71258	50.8735	43.9614	82.4614	0.969322
11CAT09 Spot 69	78.2236	2580.4	2.38183	25.6944	2.51991	0.0690598	2.89045	0.0128752	1.41589	0.489852	82.4688	1.16023	67.8069	1.89592	NA	NA	82.4688	1.16023
11CAT09 Spot 180	972.627	49429.9	4.00295	21.1604	1.12646	0.0840556	1.70529	0.0129056	1.28028	0.750766	82.6626	1.05155	81.9507	1.34259	61.2477	26.8609	82.6626	1.05155
11CAT09 Spot 134	1449.03	131064	4.22737	20.7465	1.09415	0.0858784	1.72855	0.0129276	1.33818	0.774163	82.8023	1.10096	83.6567	1.38808	108.1	25.8474	82.8023	1.10096
11CAT09 Spot 195	386.84	70865.2	2.43905	20.2124	1.04973	0.0883846	1.50399	0.0129623	1.07706	0.716135	83.0233	0.888479	85.9975	1.24014	169.349	24.5376	83.0233	0.888479
11CAT09 Spot 13	384.892	77270	2.67194	21.3984	1.14686	0.0836482	1.5677	0.0129875	1.06882	0.68178	83.184	0.883379	81.5691	1.22874	34.5322	27.4562	83.184	0.883379
11CAT09 Spot 27	482.389	73266.6	2.12746	20.7722	1.22568	0.0864217	1.74197	0.0130255	1.2378	0.710579	83.4255	1.02599	84.1646	1.407	105.163	28.9835	83.4255	1.02599
11CAT09 Spot 136	299.339	32014.9	2.24076	21.0337	1.72258	0.0858407	2.14491	0.0131008	1.27804	0.595845	83.9047	1.06538	83.6214	1.72174	75.514	40.9239	83.9047	1.06538
11CAT09 Spot 265	158.703	2202.05	1.53757	6.19239	9.57323	0.29169	9.71308	0.0131059	1.64231	0.169082	83.9373	1.36957	259.889	22.2751	2470.56	162.03	83.9373	1.36957
11CAT09 Spot 56	282.154	35564.8	2.54852	21.6158	1.28998	0.0836727	1.90377	0.0131233	1.4001	0.735435	84.0478	1.16911	81.5921	1.49255	10.2786	31.035	84.0478	1.16911
11CAT09 Spot 111	1453.54	465918	3.68599	20.1563	0.845363	0.0901194	1.57728	0.0131801	1.33161	0.844243	84.4091	1.11667	87.6146	1.32399	175.828	19.7342	84.4091	1.11667
11CAT09 Spot 121	541.479	62852.6	3.04834	20.8134	1.02796	0.0873528	1.30851	0.0131919	0.809623	0.618739	84.4846	0.679545	85.0344	1.06736	100.497	24.3152	84.4846	0.679545
11CAT09 Spot 122	73.0237	7790.38	2.58366	21.6907	2.11406	0.0840099	2.6019	0.0132218	1.51678	0.58295	84.6747	1.27593	81.9079	2.04747	1.97322	50.9207	84.6747	1.27593
11CAT09 Spot 309	1213.32	69895.2	3.12371	19.816	0.906441	0.0920739	1.33061	0.0132386	0.974107	0.732076	84.7814	0.820454	89.4334	1.13911	215.42	20.9848	84.7814	0.820454
11CAT09 Spot 238	54.6167	6529.15	2.2687	20.8624	3.45552	0.0876255	3.6253	0.0132643	1.09644	0.30244	84.9449	0.925257	85.289	2.96569	94.925	81.8274	84.9449	0.925257
11CAT09 Spot 4	692.622	141286	2.31863	19.3711	1.67117	0.0945362	2.10402	0.0132874	1.27832	0.607561	85.0921	1.0806	91.7202	1.84522	267.736	38.3495	85.0921	1.0806
11CAT09 Spot 191	518.843	60728	4.53299	20.4967	1.14474	0.089378	1.68835	0.0132924	1.24101	0.735043	85.1236	1.04945	86.9238	1.40652	136.626	26.8953	85.1236	1.04945
11CAT09 Spot 277	560.886	301018	3.07704	20.8106	1.2205	0.0881984	1.91988	0.0133178	1.48199	0.771919	85.2853	1.2556	85.8237	1.58	100.826	28.8466	85.2853	1.2556
11CAT09 Spot 302	829.906	39370.1	4.59781	21.1078	0.867476	0.0872717	1.44809	0.0133661	1.1595	0.800712	85.5924	0.985887	84.9586	1.18021	67.1591	20.6525	85.5924	0.985887
11CAT09 Spot 30	152.062	10529.1	3.03447	20.9781	2.66252	0.0883097	2.80727	0.013442	0.889787	0.316959	86.0754	0.760797	85.9276	2.31297	81.8009	63.2055	86.0754	0.760797
11CAT09 Spot 87	150.734	12103	4.02606	18.3145	2.19612	0.101264	2.43427	0.0134568	1.05011	0.431386	86.1693	0.898853	97.9428	2.27282	394.942	49.2389	86.1693	0.898853
11CAT09 Spot 63	76.7745	16416.4	2.03055	21.7306	2.18986	0.0855012	2.59685	0.0134813	1.39575	0.537479	86.3256	1.19686	83.3039	2.07692	NA	NA	86.3256	1.19686
11CAT09 Spot 184	294.965	39156	2.38549	21.4292	1.52002	0.086752	1.89781	0.0134888	1.13632	0.598752	86.3731	0.974927	84.4732	1.53827	31.0829	36.4257	86.3731	0.974927
11CAT09 Spot 257	330.498	11436.8	2.48338	21.6528	1.97051	0.0859342	2.49846	0.013501	1.53604	0.614795	86.451	1.31906	83.7088	2.00755	6.16163	47.4262	86.451	1.31906
11CAT09 Spot 198	371.697	27206.4	4.66722	20.2927	1.41062	0.0918049	1.7406	0.0135174	1.01973	0.585848	86.5552	0.876728	89.1834	1.48611	160.087	33.0001	86.5552	0.876728
11CAT09 Spot 3	310.089	1.67242e+06	13.1728	21.0947	1.41574	0.0884117	1.78129	0.0135323	1.08106	0.606896	86.6497	0.930466	86.0227	1.4692	68.6694	33.6985	86.6497	0.930466
11CAT09 Spot 105	305.888	9006.67	1.72076	10.8712	4.73018	0.171562	4.91766	0.0135327	1.34492	0.273488	86.6526	1.15761	160.774	7.31227	1466.26	89.8898	86.6526	1.15761
11CAT09 Spot 288	165.517	9174.35	1.48387	21.9094	2.45051	0.0857242	2.66577	0.0136277	1.04945	0.393676	87.2565	0.909544	83.5124	2.13716	NA	NA	87.2565	0.909544
11CAT09 Spot 279	47.963	14117.6	2.49089	20.7485	4.91902	0.0907351	5.35254	0.01366	2.11021	0.394244	87.462	1.83317	88.188	4.52115	107.899	116.236	87.462	1.83317
11CAT09 Spot 26	142.04	101449	3.5606	20.2418	1.712	0.0930787	2.0591	0.0136706	1.1441	0.55563	87.5294	0.994654	90.3673	1.78035	165.945	39.9861	87.5294	0.994654
11CAT09 Spot 261	56.6836	2095.63	3.15545	24.872	2.94993	0.0759315	3.35677	0.0137032	1.60182	0.47719	87.7366	1.39586	74.3127	2.40541	NA	NA	87.7366	1.39586
11CAT09 Spot 90	196.155	166591	2.58155	16.2528	3.14112	0.116215	3.27005	0.0137049	0.909189	0.278035	87.7477	0.792387	111.635	3.45701	656.814	67.3731	87.7477	0.792387
11CAT09 Spot 135	131.004	40070.6	2.05294	20.8952	1.38856	0.0904355	1.92485	0.0137111	1.33302	0.692532	87.7871	1.16229	87.909	1.62094	91.1973	32.8784	87.7871	1.16229
11CAT09 Spot 228	383.135	6864.54	1.93037	12.3585	3.86824	0.153061	4.07187	0.0137252	1.27154	0.312275	87.8766	1.10981	144.611	5.48832	1218.54	76.0612	87.8766	1.10981
11CAT09 Spot 255	1158.45	45838.9	2.05176	21.2573	0.833418	0.0892109	1.22903	0.0137598	0.903286	0.734959	88.0969	0.790354	86.768	1.02211	50.3445	19.8789	88.0969	0.790354
11CAT09 Spot 39	81.9507	14088.9	4.53648	19.4482	2.23504	0.0975873	2.73576	0.0137708	1.57765	0.576676	88.1668	1.38149	94.5468	2.46981	258.658	51.342	88.1668	1.38149
11CAT09 Spot 97	942.726	32995.3	3.59457	14.0889	5.27045	0.134711	5.44318	0.013771	1.36033	0.249915	88.1681	1.19121	128.322	6.56154	955.869	107.85	88.1681	1.19121
11CAT09 Spot 101	63.1883	3385.95	3.43531	22.8784	5.81975	0.0832747	5.96917	0.0138237	1.3272	0.222342	88.5033	1.16659	81.2191	4.65931	NA	NA	88.5033	1.16659
11CAT09 Spot 22	23.9439	56023.5	4.12372	21.212	4.08445	0.0907634	4.52157	0.0139695	1.93955	0.428955	89.4298	1.72256	88.2142	3.82033	55.458	97.4386	89.4298	1.72256
11CAT09 Spot 166	137.321	7592.45	1.56279	21.8461	1.64469	0.088214	2.07012	0.0139829	1.25714	0.607279	89.5154	1.11756	85.8383	1.70392	NA	NA	89.5154	1.11756
11CAT09 Spot 285	29.4199	18995.6	1.65739	19.3386	4.17642	0.0999864	4.39467	0.0140299	1.36771	0.311221	89.814	1.21988	96.7638	4.05613	271.585	95.7727	89.814	1.21988
11CAT09 Spot 196	1041.13	62007.3	4.18036	20.3247	0.755682	0.0952447	1.35912	0.014046	1.12967	0.831177	89.9163	1.00871	92.3773	1.2001	156.436	17.6897	89.9163	1.00871
11CAT09 Spot 48	36.0623	4660.34	3.96186	19.4105	3.84781	0.0999129	4.1295	0.0140717	1.49904	0.363008	90.0798	1.34095	96.6959	3.80884	263.078	88.3886	90.0798	1.34095
11CAT09 Spot 210	1177.94	55962.6	37.8904	17.8254	1.98879	0.109341	2.47178	0.014142	1.46778	0.593816	90.5265	1.31945	105.362	2.47376	455.323	44.1586	90.5265	1.31945
11CAT09 Spot 304	170.079	6745.43	4.79703	22.6785	2.19515	0.0865831	2.49647	0.0142474	1.18898	0.476265	91.1964	1.07668	84.3154	2.01989	NA	NA	91.1964	1.07668
11CAT09 Spot 40	281.71	12349.7	1.82954	12.661	3.45004	0.156973	3.7568	0.0144205	1.48687	0.395782	92.2964	1.36255	148.05	5.1755	1170.86	68.3146	92.2964	1.36255
11CAT09 Spot 133	59.2806	1915.34	2.41125	8.56814	7.20437	0.233357	7.55167	0.0145076	2.26382	0.299777	92.8499	2.08689	212.966	14.5089	1905.66	129.579	92.8499	2.08689
11CAT09 Spot 291	24.871	2110.52	4.1297	22.2699	5.27534	0.0908562	5.55734	0.0146811	1.74781	0.314504	93.9527	1.6302	88.3007	4.69989	NA	NA	93.9527	1.6302
11CAT09 Spot 289	975.721	65167.5	6.76621	18.838	1.20767	0.110434	1.62146	0.0150947	1.08197	0.667281	96.5793	1.03717	106.362	1.63736	331.399	27.3899	96.5793	1.03717
11CAT09 Spot 88	481.062	39040.7	11.0491	19.3609	1.00294	0.139424	1.45151	0.0195862	1.04928	0.722889	125.04	1.29938	132.53	1.80344	268.952	23.0028	125.04	1.29938
11CAT09 Spot 49	306.76	31559.2	0.813508	20.1535	1.02768	0.172485	1.60896	0.0252225	1.23799	0.769434	160.578	1.96339	161.573	2.40336	176.156	23.9703	160.578	1.96339
11CAT09 Spot 247	242.992	26332.8	1.05768	20.3592	1.08418	0.18553	1.58006	0.0274071	1.14941	0.727448	174.3	1.97657	172.808	2.51076	152.417	25.376	174.3	1.97657
11CAT09 Spot 188	261.841	102766	1.16914	19.6851	0.984544	0.246906	1.43213	0.0352661	1.04004	0.726215	223.423	2.28387	224.06	2.87947	230.726	22.7331	223.423	2.28387
11CAT09 Spot 224	801.156	271224	23.3718	19.3095	0.798119	0.252188	1.56789	0.0353332	1.34955	0.860744	223.841	2.96901	228.352	3.2063	275.043	18.2933	223.841	2.96901
11CAT09 Spot 173	365.099	97506.8	1.5243	19.058	0.792251	0.257509	1.28685	0.0356089	1.01406	0.788017	225.557	2.24773	232.658	2.67571	305.007	18.0448	225.557	2.24773
11CAT09 Spot 76	196.13	199980	1.9083	19.3649	1.19661	0.259273	1.97916	0.03643	1.57646	0.796528	230.666	3.57207	234.081	4.13762	268.476	27.4524	230.666	3.57207
11CAT09 Spot 237	173.937	37127	1.91881	19.8063	1.40777	0.259668	1.79094	0.0373172	1.10708	0.618158	236.182	2.56742	234.4	3.74865	216.575	32.6037	236.182	2.56742
11CAT09 Spot 10	498.498	46149	2.58493	16.6149	2.16103	0.314423	3.00557	0.0379052	2.08887	0.695	239.835	4.91779	277.603	7.30033	609.345	46.7198	239.835	4.91779
11CAT09 Spot 123	1901.17	2716.55	2.59819	6.0103	0.815762	0.89344	1.52588	0.0389627	1.28951	0.845094	246.4	3.11739	648.216	7.31089	2520.82	13.7026	246.4	3.11739
11CAT09 Spot 82	226.08	161863	2.18095	19.6609	0.993945	0.27829	1.65322	0.0396998	1.32106	0.799084	250.972	3.25177	249.3	3.65451	233.617	22.9264	250.972	3.25177
11CAT09 Spot 222	292.199	49130.6	2.38463	19.4384	1.10198	0.282581	1.59263	0.0398557	1.14983	0.721969	251.938	2.84098	252.703	3.5629	259.825	25.3151	251.938	2.84098
11CAT09 Spot 183	338.981	190842	0.899037	19.7354	1.09249	0.284521	1.75259	0.0407425	1.37041	0.781935	257.434	3.45839	254.238	3.94172	224.854	25.2485	257.434	3.45839
11CAT09 Spot 223	182.23	92895.2	1.95693	19.5845	1.0516	0.297722	1.87291	0.0423069	1.54982	0.827492	267.116	4.05521	264.619	4.36293	242.552	24.2343	267.116	4.05521
11CAT09 Spot 41	301.86	43733.9	3.25851	18.9016	1.18376	0.347203	1.89095	0.0476179	1.47459	0.779813	299.88	4.32073	302.615	4.94839	323.753	26.8854	299.88	4.32073
11CAT09 Spot 138	411.724	124269	2.13928	19.1017	0.894564	0.34439	1.5834	0.0477322	1.30649	0.825116	300.583	3.83695	300.493	4.1186	299.814	20.403	300.583	3.83695
11CAT09 Spot 60	911.308	962530	3.55766	18.811	0.698137	0.353729	1.32835	0.0482805	1.1301	0.850752	303.956	3.35527	307.522	3.52438	334.638	15.8459	303.956	3.35527
11CAT09 Spot 119	731.748	183629	3.4159	19.1717	0.860121	0.361465	1.43209	0.0502823	1.14502	0.799546	316.254	3.5338	313.308	3.86067	291.467	19.6545	316.254	3.5338
11CAT09 Spot 96	305.7	158099	1.08221	19.0836	0.913113	0.369887	2.01848	0.0512175	1.80013	0.891827	321.992	5.6539	319.57	5.53404	301.955	20.8121	321.992	5.6539
11CAT09 Spot 225	178.887	59985	6.38253	16.4253	0.98754	0.431942	1.80489	0.0514786	1.51076	0.837037	323.593	4.76805	364.555	5.52822	634.139	21.2707	323.593	4.76805
11CAT09 Spot 312	133.251	31255.2	2.37492	19.0046	1.29381	0.374149	1.6247	0.0515931	0.98271	0.604855	324.295	3.10805	322.724	4.49177	311.402	29.4457	324.295	3.10805
11CAT09 Spot 292	78.7357	27813.8	2.49697	18.2186	1.11576	0.391255	1.52095	0.0517206	1.03363	0.679593	325.076	3.27677	335.286	4.34312	406.706	24.9716	325.076	3.27677
11CAT09 Spot 187	383.627	154572	1.172	19.0333	0.942108	0.375236	1.47044	0.051821	1.12899	0.767792	325.692	3.58569	323.527	4.07387	307.998	21.4526	325.692	3.58569
11CAT09 Spot 57	256.359	64560.2	1.34799	18.25	1.278	0.406404	1.57266	0.0538157	0.91651	0.582777	337.905	3.01717	346.283	4.61441	402.851	28.6222	337.905	3.01717
11CAT09 Spot 256	641.24	31958.3	2.04707	16.0799	1.77667	0.48784	2.16373	0.0569179	1.23497	0.570762	356.855	4.2873	403.438	7.20379	679.676	37.9432	356.855	4.2873
11CAT09 Spot 204	29.7838	30193.8	0.868461	18.3991	1.80121	0.448725	2.08375	0.0599053	1.0477	0.502796	375.049	3.81729	376.386	6.55355	384.596	40.4607	375.049	3.81729
11CAT09 Spot 42	33.1602	7976.45	1.37902	19.6788	1.81021	0.419691	2.28565	0.059926	1.39547	0.610535	375.176	5.08603	355.83	6.86091	231.472	41.7778	375.176	5.08603
11CAT09 Spot 266	25.0967	666095	1.29268	16.1229	2.90357	0.526773	3.15014	0.0616248	1.22173	0.387835	385.499	4.57172	429.666	11.0364	673.964	62.1091	385.499	4.57172
11CAT09 Spot 148	1206.19	34521.8	1.1682	14.3195	0.909728	0.609627	1.60195	0.0633402	1.31857	0.823105	395.907	5.06325	483.325	6.16059	922.626	18.7037	395.907	5.06325
11CAT09 Spot 107	540.383	200382	4.04016	18.5151	0.610657	0.473096	1.31315	0.063557	1.16252	0.885293	397.222	4.47838	393.325	4.28217	370.461	13.7534	397.222	4.47838
11CAT09 Spot 110	133.922	47743.6	1.2659	18.6775	1.39461	0.481567	1.74821	0.0652625	1.05419	0.603009	407.55	4.16336	399.148	5.76985	350.802	31.4991	407.55	4.16336
11CAT09 Spot 200	213.945	72380.9	1.71394	16.5363	1.15904	0.585445	1.49004	0.0702445	0.936393	0.628435	437.628	3.96192	467.955	5.58685	619.585	25.0335	437.628	3.96192
11CAT09 Spot 21	847.301	22940.9	2.79049	13.2339	1.12052	0.752986	1.78224	0.0723043	1.38593	0.777634	450.023	6.02427	569.955	7.77341	1082.67	22.4627	450.023	6.02427
11CAT09 Spot 19	257.019	154182	2.81161	17.8229	1.03611	0.563179	1.65604	0.0728306	1.29188	0.780101	453.186	5.65357	453.594	6.05821	455.658	22.9912	453.186	5.65357
11CAT09 Spot 207	223.807	228235	2.62523	17.7761	1.24521	0.577008	1.65984	0.0744231	1.09751	0.66121	462.748	4.90069	462.537	6.16666	461.468	27.6141	462.748	4.90069
11CAT09 Spot 100	324.136	126870	20.6895	17.2165	1.01226	0.619829	1.73235	0.0774291	1.40583	0.811516	480.759	6.51277	489.74	6.73091	531.994	22.1662	480.759	6.51277
11CAT09 Spot 98	227.077	37747.2	0.921672	15.6327	1.53566	0.716198	2.26726	0.0812372	1.668	0.73569	503.503	8.07885	548.42	9.60751	739.645	32.4892	503.503	8.07885
11CAT09 Spot 269	216.848	146564	0.595544	17.468	0.908652	0.65292	1.75492	0.0827546	1.50136	0.855517	512.543	7.39718	510.274	7.03886	500.141	20.0098	512.543	7.39718
11CAT09 Spot 131	117.683	26141	2.74863	17.8005	1.10175	0.648541	1.596	0.0837642	1.15471	0.723502	518.552	5.75325	507.581	6.37537	458.471	24.458	518.552	5.75325
11CAT09 Spot 287	57.195	61225.4	2.66497	16.4838	1.23049	0.718508	1.82034	0.0859364	1.34147	0.736932	531.46	6.8434	549.786	7.72808	626.437	26.5247	531.46	6.8434
11CAT09 Spot 274	169.183	64737.3	1.96025	16.6828	1.00557	0.721665	1.84938	0.0873561	1.55211	0.839259	539.882	8.03828	551.649	7.87141	600.512	21.7645	539.882	8.03828
11CAT09 Spot 114	52.0324	49693.2	0.901348	16.808	1.26938	0.72037	1.74928	0.0878534	1.2036	0.688055	542.829	6.26598	550.885	7.43755	584.354	27.5401	542.829	6.26598
11CAT09 Spot 297	231.267	111646	2.14441	17.0955	0.832043	0.714527	1.35707	0.0886315	1.07207	0.789991	547.439	5.62664	547.431	5.74262	547.419	18.1746	547.439	5.62664
11CAT09 Spot 212	52.1194	47672	1.06036	17.3168	1.34738	0.706623	1.80434	0.0887858	1.20009	0.665113	548.352	6.30861	542.739	7.5859	519.213	29.5728	548.352	6.30861
11CAT09 Spot 286	190.628	298669	2.23023	17.1732	1.01495	0.712718	1.50454	0.0888089	1.11064	0.738193	548.489	5.83978	546.359	6.35728	537.495	22.2085	548.489	5.83978
11CAT09 Spot 91	150.224	60734.3	0.86958	17.3467	0.868933	0.706636	1.42275	0.0889408	1.12658	0.79183	549.27	5.93166	542.747	5.98161	515.421	19.0828	549.27	5.93166
11CAT09 Spot 227	35.8771	106334	0.71118	16.8284	1.60849	0.729772	1.8981	0.0891084	1.00773	0.530918	550.262	5.3151	556.419	8.13123	581.672	34.9347	550.262	5.3151
11CAT09 Spot 157	366.659	25717.9	2.31939	14.6703	1.44792	0.837982	2.02623	0.0891996	1.41744	0.699544	550.802	7.48302	618.031	9.38045	872.683	29.9731	550.802	7.48302
11CAT09 Spot 206	370.175	199938	187.558	17.0204	0.948951	0.723524	1.52156	0.0893533	1.18938	0.781687	551.711	6.289	552.745	6.48574	556.986	20.695	551.711	6.289
11CAT09 Spot 103	255.123	167368	1.23157	16.7848	0.978256	0.735302	1.42279	0.0895511	1.03312	0.726125	552.882	5.47386	559.66	6.12162	587.315	21.2052	552.882	5.47386
11CAT09 Spot 145	534.132	235971	7.02928	17.0911	0.796624	0.73455	1.20168	0.0910917	0.899687	0.748688	561.99	4.84203	559.22	5.16724	547.986	17.4001	561.99	4.84203
11CAT09 Spot 221	304.649	67558.3	1.977	17.1164	0.842664	0.740402	1.27363	0.0919533	0.955012	0.749835	567.079	5.1843	562.64	5.50167	544.732	18.3948	567.079	5.1843
11CAT09 Spot 170	71.5931	53683.5	1.09692	16.8856	0.978969	0.762893	1.41642	0.0934692	1.02365	0.722704	576.022	5.6407	575.678	6.22393	574.308	21.305	576.022	5.6407
11CAT09 Spot 99	132.064	20025.8	2.3849	16.1372	0.989012	0.801548	1.71848	0.0938524	1.40536	0.817791	578.281	7.77306	597.701	7.76366	672.079	21.1373	578.281	7.77306
11CAT09 Spot 235	138.104	148435	3.18109	16.8503	1.05195	0.78086	1.59698	0.0954703	1.20156	0.752395	587.808	6.75043	585.974	7.11017	578.851	22.8513	587.808	6.75043
11CAT09 Spot 167	79.4696	53860	0.775824	16.8986	0.981796	0.803702	1.43429	0.0985448	1.0456	0.728998	605.875	6.04642	598.915	6.48939	572.669	21.369	605.875	6.04642
11CAT09 Spot 252	52.4617	18593	1.63077	17.1957	1.16019	0.801995	1.74846	0.100065	1.30808	0.74813	614.787	7.67031	597.953	7.90155	534.611	25.4081	614.787	7.67031
11CAT09 Spot 233	208.275	172935	0.610418	16.7542	1.01156	0.823416	1.45039	0.100099	1.03941	0.716645	614.99	6.09685	609.952	6.6505	591.283	21.913	614.99	6.09685
11CAT09 Spot 7	423.408	234717	1.82257	16.8763	0.466166	0.818605	1.144	0.10024	1.04471	0.91321	615.813	6.13573	607.27	5.22871	575.497	10.1341	615.813	6.13573
11CAT09 Spot 140	298.816	1.26554e+06	1.80966	16.4263	0.710831	0.844283	1.27993	0.100627	1.0644	0.831607	618.085	6.27336	621.507	5.94954	634.007	15.3134	618.085	6.27336
11CAT09 Spot 313	196.928	97402.9	4.1185	16.709	0.672221	0.831348	1.18183	0.100791	0.972026	0.822477	619.042	5.73736	614.36	5.44753	597.131	14.5617	619.042	5.73736
11CAT09 Spot 194	131.825	75395.4	1.97906	16.686	1.00533	0.83586	1.92319	0.101199	1.6395	0.852491	621.429	9.71269	616.858	8.89113	600.098	21.7559	621.429	9.71269
11CAT09 Spot 229	136.978	181799	1.14273	15.7676	1.10595	0.895643	1.76791	0.102468	1.37926	0.780167	628.857	8.26395	649.397	8.4816	721.439	23.4691	628.857	8.26395
11CAT09 Spot 158	43.8953	135994	2.24516	16.1911	1.44905	0.872727	2.02037	0.102528	1.40788	0.696846	629.207	8.43992	637.047	9.56043	664.948	31.0326	629.207	8.43992
11CAT09 Spot 23	96.46	117919	1.95702	16.4521	0.848797	0.860581	1.44837	0.102731	1.1736	0.810286	630.392	7.04803	630.44	6.80236	630.631	18.2841	630.392	7.04803
11CAT09 Spot 202	535.461	1.66506e+07	2.11702	16.1853	0.598706	0.876674	1.06762	0.102955	0.883945	0.82796	631.702	5.31903	639.185	5.06405	665.71	12.8185	631.702	5.31903
11CAT09 Spot 38	404.768	260647	2.97188	16.5324	0.932005	0.859197	1.77517	0.103066	1.51083	0.851088	632.354	9.10014	629.684	8.33004	620.089	20.1318	632.354	9.10014
11CAT09 Spot 20	177.204	77511.3	2.24817	16.4821	0.963437	0.861898	1.72388	0.103076	1.42952	0.82925	632.408	8.61114	631.158	8.10299	626.664	20.7879	632.408	8.61114
11CAT09 Spot 306	72.37	45348.2	3.23676	14.4366	1.51425	0.98532	2.06245	0.103212	1.40026	0.678932	633.203	8.44496	696.329	10.3938	905.832	31.1885	633.203	8.44496
11CAT09 Spot 71	166.889	572999	1.82437	16.6204	0.803493	0.860541	1.84218	0.103777	1.65772	0.899867	636.506	10.0473	630.418	8.65178	608.623	17.3679	636.506	10.0473
11CAT09 Spot 102	408.658	179482	3.87572	16.6245	0.711226	0.868514	1.28039	0.104764	1.06468	0.831532	642.267	6.5085	634.76	6.04305	608.097	15.3565	642.267	6.5085
11CAT09 Spot 37	78.4277	36771.1	0.947923	16.7349	1.02825	0.863681	1.81194	0.104873	1.49192	0.823383	642.905	9.12887	632.131	8.52641	593.796	22.2791	642.905	9.12887
11CAT09 Spot 74	216.015	1.14327e+06	0.564435	15.8234	0.841253	0.935218	1.61449	0.107374	1.378	0.853518	657.48	8.61337	670.376	7.92243	713.975	17.8785	657.48	8.61337
11CAT09 Spot 94	62.5575	34405.8	4.29092	16.3375	1.14547	0.913874	1.65619	0.108333	1.19619	0.722252	663.057	7.53713	659.115	8.03011	645.668	24.6129	663.057	7.53713
11CAT09 Spot 47	779.432	29313.4	2.03246	13.7674	1.01115	1.09855	1.54508	0.109738	1.16827	0.756123	671.227	7.44732	752.647	8.2128	1002.9	20.5228	671.227	7.44732
11CAT09 Spot 52	211.203	218799	0.962324	15.9379	0.939745	0.956829	1.39049	0.110651	1.02487	0.737052	676.526	6.58207	681.652	6.90378	698.597	20.0176	676.526	6.58207
11CAT09 Spot 168	165.31	112649	7.77567	15.3742	0.859479	0.99655	1.48202	0.111168	1.20735	0.814662	679.525	7.78663	702.057	7.51124	774.83	18.0822	679.525	7.78663
11CAT09 Spot 283	264.207	74641.4	1.02943	16.1107	0.818526	0.9572	1.82136	0.111894	1.62707	0.893328	683.737	10.5552	681.845	9.0449	675.607	17.5005	683.737	10.5552
11CAT09 Spot 15	175.008	153607	3.82487	16.0501	0.870687	0.96736	1.71784	0.112656	1.48084	0.862035	688.153	9.66539	687.102	8.57685	683.682	18.6025	688.153	9.66539
11CAT09 Spot 284	63.9395	39559.9	0.667885	15.9887	1.08033	0.978929	2.33282	0.113567	2.06759	0.886306	693.429	13.5931	693.056	11.718	691.822	23.0167	693.429	13.5931
11CAT09 Spot 182	189.24	160233	8.79073	15.5701	0.948074	1.04802	1.43861	0.1184	1.08202	0.752126	721.346	7.38426	727.902	7.47511	748.125	20.0117	721.346	7.38426
11CAT09 Spot 264	314.61	117337	1.60242	15.5494	0.683852	1.07228	1.30369	0.120979	1.10993	0.851379	736.194	7.72194	739.858	6.84968	750.946	14.4422	736.194	7.72194
11CAT09 Spot 250	430.448	98076.2	3.02381	14.7493	0.829433	1.13633	1.33384	0.121609	1.04459	0.783145	739.817	7.3011	770.768	7.20406	861.555	17.1905	739.817	7.3011
11CAT09 Spot 314	92.4264	318133	1.54601	15.2903	0.687165	1.11364	1.14587	0.123552	0.916969	0.800235	750.975	6.50024	759.925	6.13036	786.325	14.4299	750.975	6.50024
11CAT09 Spot 272	476.012	1.64703e+06	2.43745	15.3	0.865686	1.14049	1.44887	0.126611	1.16181	0.801876	768.503	8.41692	772.742	7.83875	784.992	18.1824	768.503	8.41692
11CAT09 Spot 161	18.0711	15282.4	0.451541	15.1046	1.44126	1.16688	1.71925	0.127886	0.937335	0.545201	775.794	6.85127	785.184	9.40096	811.974	30.1585	775.794	6.85127
11CAT09 Spot 301	122.868	140471	0.374566	15.2256	0.902397	1.16513	1.67421	0.128717	1.41019	0.842305	780.541	10.3669	784.363	9.1483	795.23	18.9433	780.541	10.3669
11CAT09 Spot 93	96.3926	47438.6	2.07612	15.1908	0.800518	1.17328	1.39755	0.129321	1.14556	0.819694	783.99	8.45645	788.178	7.6611	800.027	16.7926	783.99	8.45645
11CAT09 Spot 197	107.368	431261	2.39961	14.7384	0.839371	1.21264	1.56838	0.129679	1.32487	0.844736	786.034	9.80405	806.402	8.72795	863.087	17.4312	786.034	9.80405
11CAT09 Spot 249	87.5933	4.00858e+07	5.75515	15.4094	1.03442	1.16815	1.72659	0.130608	1.38242	0.800664	791.335	10.2948	785.779	9.44585	770.019	21.7791	791.335	10.2948
11CAT09 Spot 263	240.414	314854	2.87606	15.0846	1.01125	1.22489	1.48368	0.134065	1.08567	0.731743	811.015	8.27361	812.007	8.29406	814.746	21.1408	811.015	8.27361
11CAT09 Spot 9	77.1718	600117	1.4873	14.2296	0.866355	1.31842	1.41998	0.136124	1.12506	0.79231	822.707	8.68968	853.823	8.19942	935.544	17.7511	822.707	8.68968
11CAT09 Spot 1	112.38	79505.1	1.98143	15.0646	0.763255	1.25719	1.36329	0.137418	1.1296	0.828585	830.046	8.79767	826.643	7.71007	817.52	15.948	830.046	8.79767
11CAT09 Spot 181	241.31	121247	1.92376	14.3378	0.789214	1.32969	1.53059	0.138331	1.31143	0.856812	835.22	10.2734	858.747	8.87057	920.004	16.2257	835.22	10.2734
11CAT09 Spot 293	44.8801	34110.8	2.69834	14.6211	1.06038	1.33318	1.69105	0.141435	1.31729	0.778978	852.774	10.5222	860.265	9.81163	879.603	21.9401	852.774	10.5222
11CAT09 Spot 213	147.237	174342	2.00199	14.672	0.757878	1.34857	1.41856	0.143566	1.19914	0.845321	864.794	9.70461	866.939	8.27099	872.445	15.6987	864.794	9.70461
11CAT09 Spot 68	53.4311	72224.4	2.58455	14.7949	0.979125	1.34976	1.48639	0.144896	1.11833	0.752383	872.289	9.1239	867.456	8.66975	855.114	20.3497	872.289	9.1239
11CAT09 Spot 129	91.6779	75468.3	6.60841	14.9402	1.03322	1.33847	1.7962	0.145095	1.46928	0.817994	873.41	12.0015	862.567	10.4394	834.815	21.51	873.41	12.0015
11CAT09 Spot 118	149.682	66580.6	2.78695	14.5827	0.929097	1.41124	1.39094	0.149323	1.03512	0.744193	897.165	8.66951	893.68	8.26622	885.05	19.2014	897.165	8.66951
11CAT09 Spot 115	119.666	777254	3.01828	14.3982	0.96493	1.44415	1.73595	0.150872	1.44306	0.831281	905.849	12.1951	907.444	10.4152	911.31	19.8599	911.31	19.8599
11CAT09 Spot 50	128.627	137394	3.94451	14.3557	0.823009	1.44252	1.34735	0.150257	1.06678	0.791758	902.403	8.98321	906.769	8.07986	917.437	16.9355	917.437	16.9355
11CAT09 Spot 137	295.567	112926	0.971925	14.1896	1.00565	1.43831	1.87892	0.148085	1.58714	0.844708	890.222	13.1969	905.017	11.2543	941.313	20.6084	941.313	20.6084
11CAT09 Spot 141	56.5692	191549	2.04188	14.1698	0.922073	1.5819	1.75916	0.162642	1.49814	0.851623	971.44	13.5101	963.118	10.9444	944.162	18.8972	944.162	18.8972
11CAT09 Spot 185	78.8039	142606	0.938445	14.035	0.885138	1.61474	1.57779	0.164438	1.30612	0.827817	981.391	11.8902	975.949	9.8939	963.742	18.0837	963.742	18.0837
11CAT09 Spot 246	28.9436	41429.7	1.65441	14.0316	1.42586	1.59636	2.10891	0.162528	1.55384	0.736798	970.809	14.0039	968.789	13.1668	964.228	29.1263	964.228	29.1263
11CAT09 Spot 104	157.497	30134.8	1.31129	13.996	0.979354	1.48635	1.69421	0.150943	1.38246	0.815994	906.248	11.6878	924.826	10.2842	969.399	19.9984	969.399	19.9984
11CAT09 Spot 192	92.3904	140426	3.19908	13.9014	0.815346	1.68312	1.4016	0.16977	1.14005	0.813387	1010.85	10.666	1002.16	8.92774	983.205	16.5972	983.205	16.5972
11CAT09 Spot 163	48.6274	442431	2.12736	13.8849	0.706808	1.71924	1.41795	0.173207	1.22923	0.866905	1029.76	11.6988	1015.74	9.10311	985.642	14.3664	985.642	14.3664
11CAT09 Spot 253	677.267	162111	8.59308	13.8809	0.754604	1.34921	1.23248	0.135889	0.974459	0.790651	821.375	7.51503	867.219	7.18744	986.214	15.3374	986.214	15.3374
11CAT09 Spot 149	226.827	71291.5	1.08417	13.8626	0.744535	1.55036	1.53348	0.155943	1.34061	0.874226	934.189	11.6587	950.637	9.46568	988.931	15.1468	988.931	15.1468
11CAT09 Spot 130	168.491	3.9068e+06	0.922109	13.8164	0.819548	1.70985	1.53345	0.171411	1.29608	0.845202	1019.88	12.2259	1012.23	9.82486	995.678	16.6357	995.678	16.6357
11CAT09 Spot 45	193.734	490887	0.942536	13.777	0.74481	1.65076	1.26326	0.165016	1.02033	0.8077	984.594	9.31657	989.844	7.98813	1001.48	15.1172	1001.48	15.1172
11CAT09 Spot 85	80.3649	118329	1.59028	13.7404	1.0529	1.67505	1.71736	0.166999	1.35673	0.790011	995.554	12.5157	999.104	10.9195	1006.88	21.3486	1006.88	21.3486
11CAT09 Spot 5	107.965	49079.1	1.21361	13.6565	0.80673	1.78809	1.55505	0.177181	1.32942	0.854908	1051.55	12.899	1041.13	10.1268	1019.3	16.3357	1019.3	16.3357
11CAT09 Spot 33	44.3578	53384.5	1.49409	13.6517	0.827841	1.70687	1.39355	0.169073	1.121	0.804426	1007	10.451	1011.11	8.92269	1020	16.7615	1020	16.7615
11CAT09 Spot 162	74.4942	165229	1.1622	13.6339	0.798035	1.73599	1.69689	0.171733	1.49753	0.882511	1021.66	14.1488	1021.98	10.9329	1022.64	16.1519	1022.64	16.1519
11CAT09 Spot 35	77.7336	197262	2.48053	13.5543	0.972212	1.58635	1.52897	0.156014	1.18006	0.771802	934.588	10.2665	964.864	9.52252	1034.48	19.6596	1034.48	19.6596
11CAT09 Spot 28	190.85	65859.9	2.8328	13.5514	1.27718	1.57611	2.08037	0.154973	1.64217	0.789366	928.782	14.2044	960.836	12.9245	1034.92	25.8199	1034.92	25.8199
11CAT09 Spot 178	324.464	235858	1.56828	13.4009	0.67623	1.78895	1.40966	0.173948	1.23687	0.877426	1033.83	11.8145	1041.44	9.18149	1057.48	13.6142	1057.48	13.6142
11CAT09 Spot 296	88.712	70688.5	1.06748	13.3396	1.12738	1.75428	2.10948	0.169797	1.78295	0.845208	1010.99	16.6831	1028.74	13.6434	1066.7	22.6477	1066.7	22.6477
11CAT09 Spot 34	91.7387	1.36324e+07	2.75988	13.2688	0.991863	1.82386	1.83802	0.175595	1.54743	0.841899	1042.86	14.8999	1054.07	12.0545	1077.38	19.9098	1077.38	19.9098
11CAT09 Spot 281	43.6391	26630.1	2.85215	13.1221	1.08254	1.82851	1.53275	0.174096	1.0851	0.707941	1034.64	10.3723	1055.74	10.0614	1099.67	21.6414	1099.67	21.6414
11CAT09 Spot 254	110.139	13366.1	1.24253	12.5435	2.11846	1.1286	5.19504	0.102718	4.74348	0.913078	630.317	28.4839	767.086	27.9753	1189.26	41.8509	1189.26	41.8509
11CAT09 Spot 307	343.056	183293	1.11344	12.1589	1.01215	2.11921	1.54629	0.186963	1.169	0.756003	1104.9	11.87	1155.08	10.6676	1250.47	19.8095	1250.47	19.8095
11CAT09 Spot 153	113.765	247681	2.67255	10.7402	1.47857	2.77585	1.95351	0.216321	1.27674	0.65356	1262.4	14.6377	1349.06	14.5834	1489.24	27.9981	1489.24	27.9981
11CAT09 Spot 186	56.5754	234818	0.957671	10.4693	0.614119	3.43478	1.28409	0.260919	1.12772	0.878223	1494.54	15.0431	1512.39	10.0987	1537.45	11.5542	1537.45	11.5542
11CAT09 Spot 143	45.4151	3.27316e+06	1.11374	10.4107	0.888746	3.51584	1.48007	0.265581	1.18353	0.799644	1518.33	16.0106	1530.78	11.701	1548.01	16.698	1548.01	16.698
11CAT09 Spot 12	57.256	93992.5	0.961836	9.4585	0.840153	4.49394	2.44403	0.308416	2.29509	0.939059	1732.91	34.8749	1729.85	20.302	1726.14	15.4276	1726.14	15.4276
11CAT09 Spot 14	92.8615	195320	0.712127	9.2515	0.705341	4.82437	1.1788	0.323847	0.94449	0.801231	1808.49	14.8943	1789.16	9.9146	1766.67	12.8867	1766.67	12.8867
11CAT09 Spot 199	131.343	2.74289e+06	1.47008	9.04002	0.923515	4.35368	1.60234	0.285571	1.30944	0.817201	1619.36	18.7509	1703.59	13.2316	1808.8	16.7838	1808.8	16.7838
11CAT09 Spot 75	912.966	1.55804e+06	2.86731	8.92346	0.594922	4.731	1.41022	0.306319	1.27858	0.906658	1722.57	19.3274	1772.75	11.8211	1832.35	10.782	1832.35	10.782
11CAT09 Spot 248	170.867	1.02818e+06	1.65935	8.83438	0.690046	4.56406	1.33808	0.29256	1.14643	0.856771	1654.31	16.7275	1742.73	11.1453	1850.52	12.4766	1850.52	12.4766
11CAT09 Spot 171	29.6887	68932.7	0.582892	8.7573	0.969282	5.42808	1.60826	0.344909	1.28335	0.797975	1910.24	21.2166	1889.3	13.7904	1866.34	17.4929	1866.34	17.4929
11CAT09 Spot 300	147.899	348253	12.517	8.68697	0.529721	5.16647	0.977628	0.325649	0.821676	0.84048	1817.26	13.0119	1847.11	8.31707	1880.88	9.54414	1880.88	9.54414
11CAT09 Spot 203	381.192	196874	34.9889	8.44845	0.751981	4.81941	1.48284	0.295433	1.27802	0.861874	1668.62	18.7889	1788.29	12.4698	1930.89	13.4664	1930.89	13.4664
11CAT09 Spot 32	64.3795	118685	0.743519	8.43192	0.882797	5.35426	1.57635	0.327577	1.30597	0.828475	1826.63	20.7733	1877.57	13.4878	1934.4	15.8029	1934.4	15.8029
11CAT09 Spot 127	197.836	188081	2.06813	8.31134	0.892885	5.54237	1.37609	0.334237	1.04708	0.76091	1858.88	16.9091	1907.19	11.8374	1960.14	15.9351	1960.14	15.9351
11CAT09 Spot 81	200.4	157514	2.53005	8.28997	0.721489	5.77779	1.56266	0.347538	1.38613	0.887032	1922.83	23.0454	1943.09	13.5267	1964.73	12.8688	1964.73	12.8688
11CAT09 Spot 160	118.34	134528	1.42548	8.22489	0.657148	5.89427	1.17331	0.351761	0.972011	0.828437	1943	16.3057	1960.39	10.1859	1978.78	11.7038	1978.78	11.7038
11CAT09 Spot 242	77.8597	2.69671e+06	1.21708	8.20818	0.783238	5.97874	1.49484	0.356077	1.27321	0.851741	1963.55	21.5517	1972.76	13.0041	1982.4	13.9436	1982.4	13.9436
11CAT09 Spot 211	343.893	358949	8.95492	7.93116	0.820798	6.05285	1.41985	0.348325	1.15856	0.815975	1926.59	19.2943	1983.48	12.3734	2043.3	14.5079	2043.3	14.5079
11CAT09 Spot 139	1211.28	4.25521e+07	41.7576	7.9065	0.807835	6.29811	1.37342	0.361312	1.11071	0.808721	1988.39	19.004	2018.19	12.0352	2048.8	14.2697	2048.8	14.2697
11CAT09 Spot 146	241.274	228164	2.53575	7.85708	0.710375	6.317	1.09664	0.36013	0.835459	0.761833	1982.79	14.2601	2020.82	9.61359	2059.87	12.5341	2059.87	12.5341
11CAT09 Spot 106	166.67	102215	1.00854	7.72811	0.686993	6.76998	1.23113	0.379619	1.02163	0.82983	2074.5	18.1219	2081.81	10.8923	2089.02	12.0816	2089.02	12.0816
11CAT09 Spot 189	90.1035	157406	2.00202	7.60919	0.726873	6.79438	1.58393	0.375125	1.40729	0.888485	2053.47	24.7479	2084.99	14.0204	2116.25	12.7416	2116.25	12.7416
11CAT09 Spot 290	174.086	160158	2.78825	7.14557	0.690092	7.31566	1.40455	0.379296	1.22333	0.870976	2072.99	21.6862	2150.72	12.5472	2225.78	11.9515	2225.78	11.9515
11CAT09 Spot 278	98.5222	603020	1.36624	7.06476	1.4563	7.85573	3.2918	0.402691	2.95214	0.896817	2181.42	54.6355	2214.62	29.6585	2245.46	25.1689	2245.46	25.1689
11CAT09 Spot 142	142.466	3.88205e+06	1.51627	6.91182	0.643903	8.08326	1.25426	0.405384	1.07636	0.858166	2193.78	20.0148	2240.37	11.3339	2283.21	11.0852	2283.21	11.0852
11CAT09 Spot 31	85.1111	153515	7.81727	6.11935	0.824667	10.7723	1.86568	0.478301	1.67353	0.897006	2519.86	34.9055	2503.68	17.3363	2490.57	13.8967	2490.57	13.8967
11CAT09 Spot 113	52.0074	273381	1.82618	6.10177	0.956142	10.7133	1.8461	0.474317	1.5792	0.855426	2502.46	32.7519	2498.58	17.1463	2495.41	16.1016	2495.41	16.1016
11CAT09 Spot 299	9.04733	112149	1.24973	6.08548	0.913439	10.7868	1.38983	0.476293	1.0475	0.753691	2511.1	21.786	2504.93	12.9155	2499.92	15.3755	2499.92	15.3755
11CAT09 Spot 58	50.9008	4.16009e+06	1.28506	5.88763	0.642237	10.6067	1.16591	0.453113	0.973074	0.834606	2409.08	19.5602	2489.29	10.8189	2555.4	10.7504	2555.4	10.7504
11CAT09 Spot 112	68.3278	4.33054e+06	1.43355	5.69217	0.812801	11.4915	1.40593	0.474617	1.14717	0.81595	2503.78	23.8019	2563.89	13.1335	2611.76	13.5352	2611.76	13.5352
11CAT09 Spot 36	48.0441	242849	1.50466	5.66859	0.637064	11.7388	1.30268	0.48282	1.13628	0.872262	2539.54	23.8508	2583.79	12.1895	2618.67	10.6015	2618.67	10.6015
11CAT09 Spot 78	467.774	439964	1.60903	5.49649	0.710972	11.9175	1.40392	0.475289	1.21058	0.862287	2506.71	25.1417	2597.94	13.1523	2669.85	11.7739	2669.85	11.7739
11CAT09 Spot 214	62.969	137879	1.52361	4.04931	0.729665	20.9516	1.29948	0.615582	1.07529	0.827473	3092.32	26.412	3136.36	12.5943	3164.65	11.5683	3164.65	11.5683
11 CAT 13 Element 2
11CAT13 Spot257	2427.24	166782	0.941434	21.5727	0.958275	0.0238444	2.16299	0.00373231	1.93913	0.896505	24.0153	0.464821	23.9271	0.51149	16.1003	23.028	24.0153	0.464821
11CAT13 Spot217	1112.82	475942	1.41548	21.1871	1.35489	0.0246637	2.11116	0.00379156	1.61903	0.766892	24.3957	0.394228	24.7393	0.515974	59.3098	32.3097	24.3957	0.394228
11CAT13 Spot271	1062.32	33724.3	1.33573	20.515	1.42415	0.0259446	2.41891	0.00386195	1.95522	0.808309	24.8478	0.484895	26.0078	0.621115	135.579	33.4637	24.8478	0.484895
11CAT13 Spot62	584.8	31633.9	1.52271	18.522	2.80351	0.0297004	3.59513	0.00399151	2.25061	0.626016	25.6797	0.5768	29.7181	1.05292	370.61	63.152	25.6797	0.5768
11CAT13 Spot279	798.646	11130.9	1.3451	16.7872	5.13111	0.0331728	5.57167	0.00404063	2.17145	0.38973	25.9951	0.563334	33.1365	1.81646	587.979	111.384	25.9951	0.563334
11CAT13 Spot84	571.15	472668	1.46766	20.3189	1.51895	0.037244	2.38966	0.00549091	1.84479	0.771988	35.2998	0.649427	37.1297	0.871245	158.079	35.5704	35.2998	0.649427
11CAT13 Spot311	602.047	34806.5	1.68487	19.9885	1.43661	0.0457574	2.49158	0.00663635	2.03572	0.817037	42.6394	0.865151	45.4297	1.10697	196.35	33.3854	42.6394	0.865151
11CAT13 Spot136	1612.39	98156.1	0.800237	20.5804	1.18258	0.0465068	2.34791	0.00694476	2.02835	0.863894	44.614	0.901804	46.157	1.05946	128.118	27.8425	44.614	0.901804
11CAT13 Spot252	596.932	179937	1.21169	21.1851	1.16065	0.046373	2.35735	0.00712824	2.05183	0.870396	45.7886	0.936176	46.0272	1.0608	59.5357	27.6795	45.7886	0.936176
11CAT13 Spot222	684.081	34413.2	0.762173	17.7857	4.64311	0.0553701	5.76291	0.00714552	3.4136	0.592339	45.8992	1.56125	54.7205	3.07004	461.243	102.98	45.8992	1.56125
11CAT13 Spot275	343.797	132264	2.12085	21.4548	1.94426	0.0459792	3.06344	0.00715772	2.36739	0.772788	45.9773	1.08459	45.645	1.36735	29.2576	46.5866	45.9773	1.08459
11CAT13 Spot291	2852.86	336333	0.566863	21.2061	1.00691	0.04659	2.03157	0.00716871	1.76448	0.868532	46.0476	0.809606	46.2377	0.918283	57.1233	23.9939	46.0476	0.809606
11CAT13 Spot150	1112.58	133506	1.00665	21.4197	1.05675	0.0461269	1.94616	0.00716893	1.63426	0.839738	46.049	0.74988	45.7883	0.871319	33.2103	25.3365	46.049	0.74988
11CAT13 Spot225	843.259	253830	1.3007	21.0693	1.55748	0.0470192	3.11226	0.00718808	2.69451	0.865775	46.1716	1.23965	46.6541	1.41914	72.5641	37.0447	46.1716	1.23965
11CAT13 Spot127	298.103	26917.8	1.45372	20.2748	1.85634	0.0489645	2.95306	0.00720322	2.29664	0.777716	46.2685	1.05882	48.5389	1.39966	163.155	43.4068	46.2685	1.05882
11CAT13 Spot41	795.549	144408	1.98777	21.1291	1.035	0.0469913	2.58919	0.00720419	2.37332	0.91663	46.2747	1.09432	46.627	1.17996	65.8148	24.617	46.2747	1.09432
11CAT13 Spot43	474.838	37132.4	1.199	21.0164	1.63142	0.0472766	2.5281	0.0072093	1.93125	0.763915	46.3074	0.891109	46.9037	1.1588	78.5032	38.7485	46.3074	0.891109
11CAT13 Spot245	565.05	17681	1.3809	20.586	1.58397	0.0483024	2.50639	0.00721485	1.94242	0.77499	46.3429	0.896948	47.8977	1.17263	127.478	37.2768	46.3429	0.896948
11CAT13 Spot140	555.804	13246.5	1.49362	21.3064	1.87834	0.046675	3.1938	0.00721578	2.58306	0.808773	46.3489	1.19293	46.3203	1.44614	45.867	44.9025	46.3489	1.19293
11CAT13 Spot53	1276.6	344735	0.982049	21.0915	0.894815	0.0471571	2.37858	0.00721674	2.20385	0.92654	46.3551	1.01793	46.7878	1.08763	70.033	21.3033	46.3551	1.01793
11CAT13 Spot117	212.055	17312	1.51149	22.0393	2.46413	0.0452257	2.99345	0.00723222	1.69965	0.56779	46.4541	0.786719	44.9133	1.31516	NA	NA	46.4541	0.786719
11CAT13 Spot230	411.973	29421.2	1.68909	20.4959	1.64792	0.0486952	3.03771	0.00724171	2.55187	0.840063	46.5148	1.18272	48.2781	1.43223	137.764	38.6907	46.5148	1.18272
11CAT13 Spot4	328.8	16251.3	1.4506	21.0027	1.50489	0.0477133	2.47188	0.00727114	1.96099	0.79332	46.7032	0.912534	47.327	1.14302	80.0568	35.7405	46.7032	0.912534
11CAT13 Spot282	1567.59	79428.4	0.917182	18.6019	2.86482	0.0539141	3.63469	0.0072769	2.23691	0.615434	46.74	1.04175	53.3187	1.88797	360.907	64.6225	46.74	1.04175
11CAT13 Spot209	655.38	31220.9	1.85892	21.5565	1.65444	0.0465867	2.69205	0.00728664	2.12367	0.788867	46.8024	0.990329	46.2346	1.21675	17.9046	39.7226	46.8024	0.990329
11CAT13 Spot203	703.477	96756.4	1.15644	21.1414	1.40261	0.0477464	2.43547	0.00732424	1.99103	0.817514	47.043	0.933231	47.359	1.12693	64.4122	33.4227	47.043	0.933231
11CAT13 Spot194	472.004	23086.8	1.56154	21.2843	1.94669	0.0474327	2.84017	0.00732529	2.06808	0.728154	47.0498	0.969486	47.055	1.30595	48.366	46.5216	47.0498	0.969486
11CAT13 Spot2	3189.31	612478	0.707634	21.0073	1.0619	0.0480654	2.48093	0.00732642	2.24218	0.903767	47.057	1.05126	47.6682	1.15529	79.5314	25.2377	47.057	1.05126
11CAT13 Spot314	639.749	11765.8	1.21703	21.7393	1.44888	0.0465549	2.56147	0.00734341	2.11232	0.82465	47.1657	0.992653	46.2037	1.15697	NA	NA	47.1657	0.992653
11CAT13 Spot233	336.092	28164	1.51382	20.9334	1.54514	0.048414	2.39656	0.00735358	1.83195	0.764408	47.2308	0.862084	48.0058	1.12372	87.9418	36.6215	47.2308	0.862084
11CAT13 Spot60	546.961	33677.5	2.14946	21.3396	1.41978	0.0475788	2.43444	0.00736694	1.97755	0.812323	47.3162	0.932278	47.1966	1.12268	42.1838	33.9524	47.3162	0.932278
11CAT13 Spot214	255.476	7672.31	0.972848	20.5722	2.20842	0.0494331	3.58302	0.00737879	2.82151	0.787467	47.3921	1.33227	48.9923	1.71373	129.055	51.9651	47.3921	1.33227
11CAT13 Spot13	497.29	49202.1	1.46186	21.4021	1.30894	0.0475468	3.24273	0.00738355	2.96682	0.914912	47.4226	1.40178	47.1656	1.49448	35.1414	31.3477	47.4226	1.40178
11CAT13 Spot315	882.961	54596.4	1.53852	21.4531	1.35458	0.0474353	2.41386	0.0073838	1.99796	0.827701	47.4242	0.944037	47.0575	1.10998	29.4349	32.4671	47.4242	0.944037
11CAT13 Spot276	410.941	22713.6	1.84691	21.5405	1.39808	0.0473669	2.6918	0.0074032	2.30025	0.85454	47.5483	1.08971	46.9913	1.23609	19.6795	33.5753	47.5483	1.08971
11CAT13 Spot104	482.722	36045.7	1.41324	21.0052	1.63729	0.048579	2.79222	0.00740395	2.26181	0.81004	47.5531	1.0716	48.1657	1.31349	79.7739	38.8667	47.5531	1.0716
11CAT13 Spot154	505.141	21664.6	1.47554	14.8865	5.76786	0.0687645	6.40587	0.00742752	2.78692	0.435058	47.704	1.32457	67.5264	4.18497	843.208	120.137	47.704	1.32457
11CAT13 Spot172	406.699	32262.8	1.88713	21.4433	1.88473	0.0477463	2.55894	0.00742882	1.73089	0.676407	47.7123	0.822796	47.359	1.18406	30.5675	45.1485	47.7123	0.822796
11CAT13 Spot54	1392.94	136441	0.675844	21.1338	1.22105	0.0484665	2.30516	0.00743204	1.9552	0.848183	47.7328	0.929826	48.0567	1.08198	65.2939	29.0761	47.7328	0.929826
11CAT13 Spot55	329.643	33369.9	2.4995	21.9322	1.71715	0.046747	2.72288	0.00743916	2.11317	0.776079	47.7784	1.00591	46.3901	1.23473	NA	NA	47.7784	1.00591
11CAT13 Spot251	161.933	2673.65	1.86517	23.6629	3.08658	0.0433962	3.75199	0.00745087	2.13317	0.568543	47.8533	1.01701	43.1345	1.58451	NA	NA	47.8533	1.01701
11CAT13 Spot292	635.153	21714.8	1.04122	21.5172	1.26821	0.0477822	3.27748	0.00746004	3.02217	0.922103	47.912	1.44262	47.3938	1.51763	22.2999	30.424	47.912	1.44262
11CAT13 Spot243	570.878	25805.3	0.99883	17.3025	3.35501	0.0595394	3.72474	0.00747483	1.6179	0.434366	48.0067	0.773815	58.7239	2.12527	521.98	73.6307	48.0067	0.773815
11CAT13 Spot305	384.073	5.42503e+06	2.20668	21.5515	1.82908	0.0478022	3.32462	0.00747505	2.77625	0.835058	48.008	1.32787	47.4131	1.54007	18.4997	43.9321	48.008	1.32787
11CAT13 Spot32	2003.17	163531	1.30793	21.078	1.0208	0.0489399	2.14489	0.00748479	1.8864	0.879487	48.0704	0.903429	48.515	1.01613	71.6007	24.2737	48.0704	0.903429
11CAT13 Spot93	593.417	127636	1.2722	21.0182	1.29188	0.0490923	2.15243	0.00748679	1.72163	0.799854	48.0832	0.824736	48.6625	1.02273	78.3086	30.692	48.0832	0.824736
11CAT13 Spot199	353.739	25462.5	2.33138	21.4869	1.59206	0.0480797	3.0979	0.00749589	2.6575	0.857841	48.1414	1.27459	47.682	1.44299	25.7095	38.1675	48.1414	1.27459
11CAT13 Spot9	404.08	32020.3	1.20527	18.0292	2.06731	0.0573065	2.9498	0.00749669	2.10418	0.713329	48.1465	1.00932	56.5819	1.6234	431.011	46.0749	48.1465	1.00932
11CAT13 Spot160	535.218	10593.9	0.812073	14.6804	5.58726	0.0704074	6.67363	0.00749973	3.64964	0.546875	48.1659	1.75133	69.086	4.45722	872.136	115.841	48.1659	1.75133
11CAT13 Spot300	841.981	21301.2	1.12896	21.3134	1.35133	0.0485552	2.41537	0.0075089	2.00199	0.828851	48.2246	0.961848	48.1426	1.13569	45.0762	32.2743	48.2246	0.961848
11CAT13 Spot81	679.41	34609.7	0.54453	21.7172	1.21347	0.0476575	2.81581	0.00750969	2.54093	0.902377	48.2297	1.22091	47.2729	1.30061	NA	NA	48.2297	1.22091
11CAT13 Spot280	306.105	141200	1.2258	20.6166	2.13307	0.0502561	2.80852	0.00751785	1.82697	0.65051	48.2819	0.878802	49.7883	1.36459	123.93	50.2245	48.2819	0.878802
11CAT13 Spot74	553.738	45299.6	1.69986	21.3441	1.33767	0.0487606	2.53093	0.00755152	2.14854	0.848916	48.4973	1.03808	48.3415	1.19482	41.6721	31.9989	48.4973	1.03808
11CAT13 Spot7	176.599	231652	3.09655	21.0518	2.81384	0.0494803	3.90631	0.00755804	2.70954	0.693632	48.5391	1.31025	49.038	1.87006	74.5076	66.899	48.5391	1.31025
11CAT13 Spot281	459.613	36563.8	1.4662	21.4846	1.54262	0.0485439	2.34673	0.00756744	1.76846	0.753585	48.5992	0.856225	48.1316	1.10316	25.9441	36.9797	48.5992	0.856225
11CAT13 Spot35	389.527	17433.6	1.91437	21.9991	2.00499	0.0474784	4.72608	0.00757861	4.27971	0.90555	48.6707	2.07512	47.0993	2.17512	NA	NA	48.6707	2.07512
11CAT13 Spot200	1817.28	55056.6	0.687791	19.9224	2.12332	0.0524892	2.93159	0.00758752	2.02132	0.689496	48.7277	0.981231	51.945	1.48452	203.995	49.259	48.7277	0.981231
11CAT13 Spot156	462.794	27859.3	1.79333	20.9702	1.33518	0.0499264	2.11297	0.00759663	1.63766	0.775051	48.7859	0.795932	49.4695	1.02022	83.7297	31.6909	48.7859	0.795932
11CAT13 Spot174	661.926	162926	1.4284	21.1328	1.40071	0.0495502	2.39604	0.00759785	1.94397	0.811327	48.7938	0.944957	49.1056	1.14859	65.413	33.3615	48.7938	0.944957
11CAT13 Spot256	771.035	29849.1	0.965786	20.8272	1.17016	0.0502888	2.54285	0.00759957	2.25761	0.887827	48.8048	1.09766	49.8199	1.23627	99.9894	27.6875	48.8048	1.09766
11CAT13 Spot101	346.059	189988	1.80358	20.3199	2.17223	0.051634	2.78747	0.00761283	1.74683	0.626672	48.8896	0.850788	51.1196	1.38967	157.995	50.8365	48.8896	0.850788
11CAT13 Spot107	319.563	13247	1.51182	21.1705	1.76594	0.0498743	2.53597	0.0076612	1.82006	0.717697	49.199	0.892043	49.4192	1.22325	61.1546	42.0805	49.199	0.892043
11CAT13 Spot309	287.11	21431.4	1.91699	20.481	2.07274	0.0518531	2.89413	0.00770572	2.01983	0.697908	49.4839	0.995665	51.3311	1.44866	139.462	48.6586	49.4839	0.995665
11CAT13 Spot51	260.973	19015.8	1.67025	17.8767	5.49978	0.0604446	6.10102	0.0078403	2.64099	0.432877	50.3447	1.32442	59.5911	3.53105	449.917	122.25	50.3447	1.32442
11CAT13 Spot204	310.847	136542	1.81098	20.5556	1.39516	0.0534788	2.64729	0.00797629	2.24982	0.849857	51.2145	1.14767	52.8993	1.36455	130.9	32.8054	51.2145	1.14767
11CAT13 Spot241	207.647	2205.96	1.22118	10.094	4.46944	0.111128	4.83065	0.00813905	1.83282	0.379416	52.2553	0.953877	106.997	4.90568	1606.65	83.3677	52.2553	0.953877
11CAT13 Spot187	358.223	10218.5	1.21617	21.3545	1.44136	0.0535984	2.44073	0.00830478	1.96969	0.807006	53.315	1.04581	53.0145	1.26074	40.5195	34.4752	53.315	1.04581
11CAT13 Spot138	1793.61	61201.4	6.33917	20.045	1.28921	0.0655058	2.47505	0.0095274	2.11277	0.853629	61.1268	1.28537	64.4257	1.54503	189.742	30.0024	61.1268	1.28537
11CAT13 Spot96	409.026	1131.4	1.57696	3.06148	50.0166	0.482581	50.2466	0.0107199	4.80157	0.0955601	68.737	3.28292	399.842	167.574	3601.37	NA	68.737	3.28292
11CAT13 Spot19	1373.72	76311.8	4.82292	20.7885	0.791305	0.0838691	1.83423	0.0126507	1.65476	0.902156	81.04	1.33262	81.7761	1.44115	104.368	18.6806	81.04	1.33262
11CAT13 Spot17	477.791	30749.7	2.47992	21.234	1.31845	0.0829294	3.31914	0.012777	3.04605	0.917721	81.8438	2.47724	80.8953	2.58086	54.0191	31.4713	81.8438	2.47724
11CAT13 Spot163	588.97	89586.1	0.969953	20.6633	1.26025	0.090515	4.34429	0.0135709	4.15748	0.956999	86.8953	3.58841	87.983	3.66133	118.597	29.7087	86.8953	3.58841
11CAT13 Spot46	154.292	47293.2	1.33703	20.9783	1.8899	0.0893585	4.42204	0.0136018	3.99784	0.904071	87.0916	3.45837	86.9056	3.68315	82.8103	44.8749	87.0916	3.45837
11CAT13 Spot149	188.422	36957.5	3.58912	20.6636	1.85278	0.0910605	2.8689	0.0136528	2.19039	0.763494	87.4165	1.90184	88.4908	2.43124	118.581	43.658	87.4165	1.90184
11CAT13 Spot308	163.973	19172.7	14.0858	21.112	2.10856	0.0917165	2.97907	0.0140496	2.10449	0.706423	89.9393	1.87962	89.1011	2.54126	67.7642	50.1996	89.9393	1.87962
11CAT13 Spot152	54.4139	3159.92	2.63209	20.5513	6.05021	0.0959659	6.66298	0.0143101	2.7911	0.418897	91.5952	2.53844	93.0458	5.92411	131.41	142.373	91.5952	2.53844
11CAT13 Spot296	39.3017	19437.2	2.1695	18.5046	3.73171	0.1094	4.32246	0.0146888	2.18128	0.504639	94.0012	2.03555	105.417	4.32807	372.725	84.0407	94.0012	2.03555
11CAT13 Spot304	46.2892	9386	0.0839464	6.80043	3.14854	0.356911	4.15343	0.017611	2.70881	0.652188	112.54	3.02204	309.906	11.0933	2311.88	54.0457	112.54	3.02204
11CAT13 Spot228	1170.39	18026.3	0.654764	14.9617	2.04759	0.20524	3.29198	0.0222808	2.57769	0.783021	142.055	3.62168	189.551	5.69219	832.725	42.6845	142.055	3.62168
11CAT13 Spot192	744.349	83766.2	1.11832	20.24	0.914294	0.169486	2.24589	0.0248905	2.05136	0.913385	158.49	3.21157	158.973	3.30491	167.168	21.3382	158.49	3.21157
11CAT13 Spot183	3955.42	24570.6	9.48555	15.4468	0.90935	0.240169	3.09454	0.026918	2.95791	0.95585	171.23	4.99816	218.559	6.08508	765.828	19.1586	171.23	4.99816
11CAT13 Spot170	912.042	30077	2.47047	16.5676	1.2339	0.265433	3.31891	0.0319081	3.08102	0.928322	202.479	6.14147	239.035	7.06884	616.444	26.6526	202.479	6.14147
11CAT13 Spot87	661.281	71742.2	0.74713	17.5754	1.14891	0.276894	3.04957	0.0353107	2.82487	0.926317	223.701	6.21087	248.191	6.7148	487.571	25.3765	223.701	6.21087
11CAT13 Spot76	148.784	22766.6	0.886223	19.9504	1.22939	0.254233	2.10475	0.0368019	1.70838	0.81168	232.979	3.90911	230.009	4.33198	200.761	28.5462	232.979	3.90911
11CAT13 Spot208	121.825	34909.9	1.96227	19.6862	1.65779	0.258487	2.40498	0.0369222	1.74231	0.72446	233.727	3.9993	233.447	5.01573	231.609	38.2567	233.727	3.9993
11CAT13 Spot211	1330.01	109089	3.8984	17.481	0.773572	0.295775	1.69193	0.0375159	1.50473	0.889357	237.417	3.50749	263.094	3.92144	499.421	17.0152	237.417	3.50749
11CAT13 Spot110	564.218	76568.1	3.89885	18.0086	0.892788	0.28894	2.62877	0.037755	2.47253	0.940562	238.902	5.7988	257.725	5.9836	433.571	19.8877	238.902	5.7988
11CAT13 Spot63	589.196	238750	0.780649	19.5928	1.10078	0.269197	2.4676	0.0382697	2.20847	0.894986	242.099	5.24752	242.051	5.31434	242.572	25.3551	242.099	5.24752
11CAT13 Spot5	99.2388	16735.5	3.15889	19.808	1.70026	0.271145	2.41222	0.0389699	1.71112	0.709354	246.445	4.13737	243.609	5.22465	217.349	39.3627	246.445	4.13737
11CAT13 Spot121	710.774	141993	1.90692	19.4707	0.840622	0.280174	1.90215	0.039582	1.70632	0.897048	250.241	4.1881	250.796	4.22704	256.984	19.3107	250.241	4.1881
11CAT13 Spot67	207.387	289407	1.37315	18.9883	1.16657	0.287332	2.38148	0.0395874	2.07619	0.871806	250.275	5.0966	256.457	5.39726	314.349	26.5453	250.275	5.0966
11CAT13 Spot139	81.967	28972.2	0.723791	19.6605	1.60944	0.27846	3.45293	0.0397233	3.05491	0.884728	251.118	7.52392	249.436	7.63665	234.667	37.1212	251.118	7.52392
11CAT13 Spot261	128.682	98200.6	2.53615	19.3021	1.17642	0.284412	2.28368	0.0398328	1.95736	0.857106	251.796	4.83354	254.151	5.13468	276.958	26.9554	251.796	4.83354
11CAT13 Spot215	67.5451	27755.6	2.38169	19.1496	1.75304	0.287104	2.82351	0.0398921	2.21338	0.783911	252.164	5.4736	256.277	6.39514	295.092	40.0235	252.164	5.4736
11CAT13 Spot226	685.1	67236.8	6.39028	17.2352	1.25331	0.319438	3.63665	0.0399477	3.41387	0.938738	252.508	8.45366	281.47	8.94006	530.563	27.4465	252.508	8.45366
11CAT13 Spot132	65.733	14410.9	0.0269501	20.1436	1.84006	0.277666	2.48677	0.0405832	1.67279	0.672674	256.447	4.2056	248.804	5.4875	178.32	42.9017	256.447	4.2056
11CAT13 Spot201	443.166	77496	2.87598	17.8717	1.07273	0.315711	4.6445	0.0409395	4.51892	0.972961	258.654	11.457	278.598	11.3166	450.54	23.8258	258.654	11.457
11CAT13 Spot270	136.631	192664	3.53578	18.868	1.13909	0.299889	2.30545	0.0410558	2.00439	0.869413	259.374	5.09565	266.314	5.40062	328.769	25.8487	259.374	5.09565
11CAT13 Spot267	1398.91	51924.9	1.04009	17.2478	0.810697	0.328412	2.16844	0.0411	2.01119	0.927484	259.647	5.11824	288.353	5.44336	528.964	17.7644	259.647	5.11824
11CAT13 Spot164	1883.71	27955.1	1.49498	15.5577	0.888459	0.37216	2.70399	0.0420109	2.55386	0.944479	265.286	6.63753	321.253	7.44677	750.735	18.7445	265.286	6.63753
11CAT13 Spot24	668.472	52756.6	1.67537	17.374	0.870139	0.333922	2.60422	0.0420951	2.45455	0.942528	265.806	6.39168	292.556	6.61955	512.977	19.131	265.806	6.39168
11CAT13 Spot161	1020.81	92495.8	3.61002	17.6422	1.02052	0.332174	2.08917	0.0425212	1.82295	0.872574	268.441	4.79307	291.224	5.28946	479.177	22.5618	268.441	4.79307
11CAT13 Spot94	918.446	77013.7	2.48457	17.5824	0.964082	0.335292	2.91104	0.042775	2.74676	0.943567	270.011	7.26338	293.598	7.42221	486.692	21.2867	270.011	7.26338
11CAT13 Spot113	915.233	65961.5	1.3289	17.9437	1.43056	0.339316	3.80061	0.0441778	3.5211	0.926456	278.677	9.60344	296.653	9.77728	441.597	31.8354	278.677	9.60344
11CAT13 Spot133	707.697	4.5271e+06	3.00039	18.6772	1.01962	0.337846	9.451	0.0457846	9.39583	0.994163	288.589	26.5175	295.539	24.2383	351.786	23.0274	288.589	26.5175
11CAT13 Spot297	1024.95	160303	2.23974	18.8099	0.944162	0.340263	2.40811	0.0464397	2.2153	0.919933	292.626	6.33761	297.371	6.20778	335.759	21.3826	292.626	6.33761
11CAT13 Spot301	276.512	104710	1.70501	18.9481	0.883793	0.346393	1.79996	0.0476236	1.56804	0.871155	299.915	4.59508	302.004	4.70211	319.147	20.1094	299.915	4.59508
11CAT13 Spot52	990.086	94281.6	2.62342	17.8022	1.85486	0.369444	4.15285	0.0477211	3.7156	0.89471	300.515	10.9097	319.241	11.3762	459.184	41.1578	300.515	10.9097
11CAT13 Spot153	708.75	1.07685e+06	1.13357	18.7411	0.826887	0.351112	1.73055	0.047745	1.52022	0.878459	300.662	4.46577	305.557	4.56638	344.094	18.7087	300.662	4.46577
11CAT13 Spot274	1097.42	161562	4.73031	18.9019	0.702035	0.350843	1.83826	0.0481178	1.69893	0.924203	302.955	5.02793	305.355	4.84785	324.696	15.9404	302.955	5.02793
11CAT13 Spot28	380.265	68503.2	2.43023	18.7779	0.935421	0.354139	2.75656	0.0482512	2.593	0.940663	303.776	7.69419	307.83	7.32009	339.665	21.1834	303.776	7.69419
11CAT13 Spot180	459.824	52276.2	0.969217	16.7621	0.923039	0.397046	3.05751	0.0482901	2.91485	0.953342	304.015	8.65589	339.503	8.82346	591.195	20.0136	304.015	8.65589
11CAT13 Spot90	490.098	49845.1	1.27763	18.1436	1.23448	0.367507	2.59386	0.0483812	2.28126	0.879487	304.575	6.78658	317.804	7.07814	416.907	27.5791	304.575	6.78658
11CAT13 Spot118	290.402	127776	2.47088	18.572	1.50464	0.359425	3.64936	0.0484345	3.32474	0.911047	304.903	9.90124	311.786	9.79746	364.53	33.9035	304.903	9.90124
11CAT13 Spot137	225.789	2.38762e+06	2.18207	18.9601	1.1012	0.35324	4.67894	0.0485956	4.54751	0.97191	305.894	13.5857	307.155	12.4021	317.711	25.0312	305.894	13.5857
11CAT13 Spot23	360.878	118445	1.93656	18.9491	0.891853	0.353751	2.41723	0.0486377	2.24669	0.929447	306.152	6.71751	307.538	6.41376	319.031	20.2926	306.152	6.71751
11CAT13 Spot254	490.486	150392	1.78249	19.1305	0.918413	0.351402	1.91563	0.0487773	1.68112	0.87758	307.01	5.04025	305.775	5.05784	297.347	20.934	307.01	5.04025
11CAT13 Spot97	647.645	166069	1.784	18.7669	1.21757	0.358772	2.36166	0.048854	2.0236	0.856855	307.482	6.07613	311.297	6.33175	340.982	27.5601	307.482	6.07613
11CAT13 Spot50	720.645	483801	3.75026	18.9262	0.813757	0.356727	2.1609	0.0489877	2.00182	0.926383	308.304	6.02644	309.768	5.76917	321.819	18.4947	308.304	6.02644
11CAT13 Spot14	886.092	173773	1.56137	18.8452	1.04888	0.358752	2.37917	0.0490548	2.13549	0.897577	308.716	6.43722	311.282	6.37845	331.546	23.7905	308.716	6.43722
11CAT13 Spot48	267.274	31560	1.93291	16.7942	2.48304	0.403127	3.17556	0.0491236	1.97957	0.623376	309.139	5.9752	343.914	9.26419	587.054	53.8875	309.139	5.9752
11CAT13 Spot290	278.495	60356	2.87062	19.4038	0.956966	0.348926	1.7772	0.0491255	1.49755	0.842646	309.15	4.52043	303.913	4.66782	264.907	21.9763	309.15	4.52043
11CAT13 Spot124	303.048	4.64078e+06	2.59152	18.8207	1.07847	0.35991	2.37769	0.0491494	2.11904	0.891217	309.297	6.39938	312.147	6.38962	334.499	24.4328	309.297	6.39938
11CAT13 Spot134	230.362	127845	1.76404	18.9819	1.06181	0.357374	2.52236	0.0492211	2.28798	0.907079	309.738	6.91917	310.252	6.7432	315.096	24.1731	309.738	6.91917
11CAT13 Spot265	367.278	162309	2.66462	18.8409	0.796325	0.360268	2.29829	0.049251	2.15592	0.938055	309.922	6.52361	312.415	6.18075	332.05	18.0421	309.922	6.52361
11CAT13 Spot112	585.529	7.54545e+06	1.37531	18.9287	0.906823	0.35869	1.76588	0.0492638	1.51526	0.858075	310	4.58615	311.237	4.73363	321.521	20.5965	310	4.58615
11CAT13 Spot249	341.216	392271	3.2352	18.411	1.05698	0.369042	2.44069	0.0492994	2.19995	0.901362	310.219	6.66304	318.943	6.68049	384.125	23.7492	310.219	6.66304
11CAT13 Spot75	312.706	173937	3.02311	18.8895	1.09573	0.35987	2.12959	0.0493235	1.82607	0.857475	310.367	5.53326	312.118	5.72242	326.197	24.8625	310.367	5.53326
11CAT13 Spot162	604.68	176762	3.26754	18.9109	0.840898	0.359893	1.89095	0.0493826	1.69369	0.895682	310.73	5.13798	312.135	5.08139	323.622	19.1195	310.73	5.13798
11CAT13 Spot1	337.393	148987	2.67526	18.9731	1.06742	0.359535	2.60713	0.0494956	2.3786	0.912344	311.424	7.23145	311.868	7.00084	316.151	24.2959	311.424	7.23145
11CAT13 Spot29	302.283	172715	2.65985	18.8309	1.14137	0.362267	2.34823	0.0494979	2.05218	0.873928	311.439	6.23936	313.906	6.34079	333.249	25.8734	311.439	6.23936
11CAT13 Spot99	184.024	49900.3	3.90452	19.2567	1.07756	0.354761	2.11818	0.0495685	1.82361	0.860934	311.872	5.55196	308.296	5.63211	282.35	24.6564	311.872	5.55196
11CAT13 Spot119	240.947	199971	1.73704	18.3331	1.17497	0.372852	2.53829	0.0495975	2.24997	0.886412	312.05	6.85382	321.765	6.9999	393.649	26.3565	312.05	6.85382
11CAT13 Spot176	419.443	131176	2.30795	18.8569	0.939824	0.362659	2.03036	0.0496199	1.79975	0.886418	312.187	5.48471	314.198	5.4868	330.106	21.3082	312.187	5.48471
11CAT13 Spot22	275.778	61013.8	1.1245	19.2669	1.29653	0.355118	1.88161	0.0496446	1.36363	0.724711	312.339	4.1576	308.564	5.00679	281.143	29.6706	312.339	4.1576
11CAT13 Spot72	241.536	421462	2.71635	18.7543	1.18789	0.3649	2.10638	0.0496549	1.73947	0.825811	312.403	5.30459	315.866	5.718	342.494	26.8879	312.403	5.30459
11CAT13 Spot212	691.511	302429	1.88636	18.9897	0.928098	0.360901	2.23982	0.0497271	2.03848	0.910112	312.846	6.22504	312.887	6.03128	314.193	21.0916	312.846	6.22504
11CAT13 Spot227	415.252	98520.9	1.86365	18.7941	0.920392	0.36515	2.03973	0.0497943	1.82027	0.892407	313.259	5.56582	316.052	5.53985	337.666	20.8507	313.259	5.56582
11CAT13 Spot80	166.837	165237	2.00402	19.1989	1.23496	0.358355	2.36816	0.0499205	2.02065	0.853259	314.033	6.19345	310.986	6.34376	289.18	28.2097	314.033	6.19345
11CAT13 Spot191	163.983	64675	2.66146	19.1238	1.20902	0.359836	2.5743	0.0499307	2.27273	0.882854	314.096	6.96745	312.092	6.91694	298.162	27.6024	314.096	6.96745
11CAT13 Spot155	1003.52	238362	1.93052	18.6677	0.698749	0.368938	2.19464	0.0499726	2.08043	0.94796	314.353	6.38301	318.866	6.00576	352.975	15.765	314.353	6.38301
11CAT13 Spot205	266.541	163195	2.34602	18.9881	1.0898	0.363129	1.75537	0.0500299	1.3761	0.783939	314.705	4.22665	314.548	4.74816	314.366	24.7692	314.705	4.22665
11CAT13 Spot123	192.348	126858	3.46525	18.6593	1.12002	0.369852	2.45383	0.0500738	2.18331	0.889755	314.975	6.71156	319.543	6.7272	353.984	25.2928	314.975	6.71156
11CAT13 Spot310	240.035	40035	2.35887	19.3908	1.05774	0.356264	2.12052	0.050125	1.83788	0.866712	315.289	5.65523	309.421	5.65595	266.433	24.2509	315.289	5.65523
11CAT13 Spot8	134.279	65992.9	2.63519	18.9149	1.52955	0.365542	2.53948	0.0501683	2.02717	0.798264	315.555	6.2428	316.344	6.90261	323.174	34.7333	315.555	6.2428
11CAT13 Spot260	387.964	239691	3.2449	18.7587	1.03154	0.369181	2.79781	0.0502494	2.60071	0.92955	316.053	8.02137	319.047	7.66012	341.94	23.3517	316.053	8.02137
11CAT13 Spot240	471.356	868589	2.68697	19.0896	0.960429	0.363197	2.30931	0.0503069	2.10012	0.909413	316.405	6.48445	314.599	6.24743	302.224	21.8815	316.405	6.48445
11CAT13 Spot157	489.843	131590	2.95884	18.9193	0.82159	0.367518	2.04255	0.0504511	1.87003	0.915536	317.291	5.78977	317.812	5.57382	322.649	18.6665	317.291	5.78977
11CAT13 Spot237	349.611	7.67447e+06	3.24603	19.1677	0.85065	0.363031	2.01631	0.0504895	1.82808	0.906649	317.526	5.664	314.475	5.45292	292.927	19.4473	317.526	5.664
11CAT13 Spot272	335.16	291167	3.39454	19.1349	1.10208	0.36407	2.09046	0.0505475	1.77636	0.849745	317.882	5.50975	315.249	5.66532	296.848	25.1711	317.882	5.50975
11CAT13 Spot284	395.598	84071.8	2.67554	19.201	1.28824	0.362881	2.43398	0.0505564	2.06511	0.848451	317.936	6.40646	314.364	6.5805	288.931	29.4388	317.936	6.40646
11CAT13 Spot189	336.689	1.15859e+07	2.48985	18.8233	1.03249	0.370277	2.50471	0.0505719	2.28201	0.911085	318.032	7.08139	319.858	6.87247	334.149	23.3955	318.032	7.08139
11CAT13 Spot236	325.094	209692	1.81638	18.9722	1.15025	0.368063	2.06286	0.0506672	1.7124	0.830109	318.617	5.32335	318.217	5.63533	316.255	26.1615	318.617	5.32335
11CAT13 Spot307	505.367	995706	7.34094	18.9019	1.52953	0.370258	2.37629	0.0507805	1.81859	0.765308	319.312	5.6655	319.845	6.51984	324.696	34.7153	319.312	5.6655
11CAT13 Spot44	298.883	175301	2.37622	19.29	0.926806	0.363336	2.54435	0.0508546	2.36954	0.931297	319.766	7.39215	314.703	6.88524	278.39	21.2019	319.766	7.39215
11CAT13 Spot130	390.913	76044.5	2.17784	18.7379	1.27562	0.374367	2.92511	0.0508987	2.63231	0.899902	320.037	8.21869	322.885	8.09053	344.442	28.864	320.037	8.21869
11CAT13 Spot221	288.978	1.02594e+06	2.33128	19.022	1.11028	0.371872	2.53049	0.0513259	2.27391	0.898604	322.657	7.15633	321.04	6.965	310.316	25.2661	322.657	7.15633
11CAT13 Spot125	291.828	192727	3.36584	18.7848	0.724849	0.377089	2.11491	0.0513972	1.98682	0.939433	323.094	6.26107	324.894	5.88043	338.779	16.3965	323.094	6.26107
11CAT13 Spot306	254.674	48951	2.94537	19.1421	1.19638	0.371976	2.3526	0.0516646	2.02568	0.861042	324.733	6.41513	321.117	6.47667	295.944	27.3223	324.733	6.41513
11CAT13 Spot190	141.879	69757.1	2.43027	19.0693	1.02424	0.375	2.42578	0.0518863	2.19893	0.906487	326.092	6.99221	323.352	6.71761	304.682	23.3403	326.092	6.99221
11CAT13 Spot16	238.712	124611	5.32893	18.5454	1.83329	0.388185	2.56051	0.0522351	1.78753	0.698114	328.229	5.72032	333.043	7.27035	367.764	41.2907	328.229	5.72032
11CAT13 Spot82	342.111	157085	4.65648	18.9757	0.937406	0.384098	2.8863	0.0528845	2.72984	0.945791	332.207	8.83901	330.049	8.13311	315.831	21.3258	332.207	8.83901
11CAT13 Spot141	150.564	90439.4	2.95919	17.7396	1.42903	0.419055	2.68702	0.053939	2.27551	0.846854	338.66	7.50731	355.375	8.05714	467.031	31.6488	338.66	7.50731
11CAT13 Spot246	1670.24	40661.2	1.12773	15.1644	0.734371	0.490872	2.48903	0.0540108	2.37823	0.955484	339.099	7.85611	405.504	8.32142	804.579	15.3955	339.099	7.85611
11CAT13 Spot86	1090.49	57708.2	1.33673	15.2364	0.807723	0.524447	4.78156	0.0579791	4.71285	0.985629	363.323	16.6493	428.117	16.7043	794.652	16.9593	363.323	16.6493
11CAT13 Spot31	1162.64	129326	2.40493	17.4038	1.10456	0.461703	2.64346	0.0583035	2.40164	0.908518	365.3	8.52923	385.441	8.47846	509.163	24.2728	365.3	8.52923
11CAT13 Spot148	1834.72	42406.8	6.6697	14.7666	0.93066	0.564034	2.14722	0.060433	1.93505	0.901189	378.258	7.10888	454.149	7.86273	859.987	19.3158	378.258	7.10888
11CAT13 Spot18	771.499	414059	2.31683	17.0601	1.48398	0.489826	5.3206	0.0606332	5.10946	0.960316	379.475	18.8295	404.792	17.764	552.886	32.4088	379.475	18.8295
11CAT13 Spot181	967.409	103452	1.88967	15.5281	0.818315	0.539225	3.0914	0.0607543	2.98113	0.964329	380.211	11.0068	437.914	10.9969	754.749	17.251	380.211	11.0068
11CAT13 Spot224	429.084	172128	2.92896	18.4025	1.03513	0.456682	2.33923	0.0609787	2.09774	0.896764	381.575	7.77214	381.948	7.44663	385.167	23.2537	381.575	7.77214
11CAT13 Spot238	312.079	129443	3.16893	17.301	0.962653	0.490795	3.86107	0.0616112	3.73914	0.96842	385.417	13.989	405.452	12.9075	522.17	21.1184	385.417	13.989
11CAT13 Spot71	709.316	1.04025e+06	3.18116	18.4464	0.805665	0.462559	1.91912	0.0619109	1.74182	0.907612	387.236	6.54636	386.036	6.16299	379.807	18.1163	387.236	6.54636
11CAT13 Spot278	200.782	134819	3.01881	17.7227	0.959865	0.524831	6.05515	0.0674897	5.97859	0.987356	421.014	24.3665	428.373	21.1649	469.138	21.259	421.014	24.3665
11CAT13 Spot69	190.137	153776	11.2811	18.0763	1.06352	0.517982	5.20168	0.067938	5.0918	0.978876	423.721	20.8813	423.803	18.0247	425.2	23.7251	423.721	20.8813
11CAT13 Spot229	524.362	1.92214e+06	17.0481	17.8807	0.897491	0.529599	2.02125	0.0687098	1.81106	0.896013	428.378	7.50604	431.543	7.10601	449.422	19.9488	428.378	7.50604
11CAT13 Spot143	912.145	196996	6.88486	17.3189	0.937413	0.55648	2.40774	0.0699292	2.21776	0.921097	435.729	9.34407	449.233	8.74088	519.898	20.5936	435.729	9.34407
11CAT13 Spot20	502.524	188728	1.99051	17.8956	0.834326	0.54536	2.0087	0.0708138	1.82724	0.909659	441.057	7.78963	441.953	7.19791	447.567	18.5578	441.057	7.78963
11CAT13 Spot59	227.144	685649	5.47041	17.9069	0.840665	0.547673	1.87203	0.0711591	1.67266	0.893499	443.135	7.16311	443.471	6.72653	446.16	18.6884	443.135	7.16311
11CAT13 Spot216	355.905	112749	3.46335	18.0103	0.945478	0.548192	2.54568	0.0716376	2.36359	0.928471	446.014	10.1855	443.812	9.15278	433.359	21.0733	446.014	10.1855
11CAT13 Spot115	269.579	126679	5.02939	17.7846	0.829302	0.555593	1.84643	0.0716949	1.64972	0.893462	446.359	7.1145	448.654	6.69622	461.381	18.3851	446.359	7.1145
11CAT13 Spot105	279.067	1.17474e+06	1.91041	17.747	0.869051	0.567619	1.98088	0.0730919	1.78006	0.898623	454.756	7.81602	456.474	7.28301	466.096	19.2624	454.756	7.81602
11CAT13 Spot91	325.315	77290.7	1.77506	17.7975	0.823362	0.569375	2.7191	0.0735269	2.59145	0.953052	457.369	11.4418	457.61	10.0171	459.79	18.2578	457.369	11.4418
11CAT13 Spot77	123.06	162844	2.45578	17.9182	0.960376	0.56932	2.12633	0.0740183	1.89709	0.89219	460.319	8.42817	457.574	7.83273	444.761	21.3654	460.319	8.42817
11CAT13 Spot173	395.431	121380	3.76739	17.6041	0.805144	0.580424	1.85047	0.0741389	1.66613	0.900381	461.043	7.4133	464.734	6.90065	483.996	17.7932	461.043	7.4133
11CAT13 Spot289	378.538	210310	2.75515	17.5045	0.818508	0.588006	1.50156	0.0746825	1.25886	0.838368	464.305	5.63943	469.594	5.64557	496.467	18.0355	464.305	5.63943
11CAT13 Spot295	182.95	140161	1.83539	16.9109	1.12069	0.609272	2.0255	0.0747593	1.68721	0.832986	464.765	7.56557	483.101	7.78666	572.001	24.3895	464.765	7.56557
11CAT13 Spot10	860.114	244210	2.7177	17.3144	0.984292	0.632483	2.35422	0.0794592	2.13857	0.908402	492.894	10.148	497.641	9.26165	520.472	21.6146	492.894	10.148
11CAT13 Spot196	258.086	95566.4	1.86821	16.8605	1.05544	0.664424	2.17911	0.0812837	1.90646	0.874878	503.78	9.23867	517.316	8.83286	578.485	22.9144	503.78	9.23867
11CAT13 Spot244	261.71	1.02606e+06	5.73135	17.0158	1.16671	0.729393	2.49908	0.0900539	2.21002	0.884333	555.856	11.7698	556.197	10.7027	558.52	25.4259	555.856	11.7698
11CAT13 Spot88	806.892	8.57543e+06	3.18416	17.1172	0.811694	0.730904	1.80324	0.0907783	1.61022	0.892962	560.139	8.63872	557.084	7.73176	545.568	17.7156	560.139	8.63872
11CAT13 Spot167	304.823	402540	2.37154	16.5085	0.939651	0.76541	2.16455	0.0916831	1.94995	0.90086	565.484	10.5569	577.127	9.52924	624.152	20.2828	565.484	10.5569
11CAT13 Spot232	250.378	1.24685e+06	2.26057	16.7946	0.985365	0.768674	2.45983	0.0936696	2.25384	0.91626	577.203	12.4438	579.002	10.8554	586.99	21.3813	577.203	12.4438
11CAT13 Spot239	172.529	215830	0.388515	16.6525	0.876511	0.793564	2.51145	0.0958844	2.35353	0.937121	590.245	13.2746	593.191	11.2833	605.398	18.9393	590.245	13.2746
11CAT13 Spot219	156.157	287113	101.706	16.6287	1.11552	0.796277	2.22689	0.0960749	1.92734	0.865487	591.365	10.8905	594.726	10.0238	608.488	24.1382	591.365	10.8905
11CAT13 Spot25	505.681	161233	0.912359	16.4709	1.14657	0.81337	2.47692	0.0972058	2.19557	0.88641	598.013	12.5392	604.343	11.2814	629.071	24.7152	598.013	12.5392
11CAT13 Spot49	215.866	5.07879e+06	1.14727	16.4058	0.84855	0.818929	3.51837	0.0974837	3.41451	0.970481	599.646	19.5516	607.451	16.0856	637.63	18.2777	599.646	19.5516
11CAT13 Spot6	273.995	181174	2.47023	16.721	0.98513	0.807295	2.12085	0.097945	1.87816	0.885574	602.355	10.8008	600.935	9.61955	596.509	21.3362	602.355	10.8008
11CAT13 Spot266	166.54	208550	2.5171	16.5695	0.757548	0.817058	2.02939	0.0982311	1.8827	0.927716	604.034	10.8556	606.406	9.266	616.197	16.357	604.034	10.8556
11CAT13 Spot103	178.11	174983	1.53444	16.5016	1.29815	0.827726	2.7113	0.0991061	2.38033	0.877929	609.168	13.8362	612.35	12.4682	625.052	27.9889	609.168	13.8362
11CAT13 Spot285	827.383	711839	1.09708	16.4943	0.942625	0.828116	2.16946	0.0991091	1.95398	0.900673	609.186	11.3582	612.566	9.97893	626.003	20.3408	609.186	11.3582
11CAT13 Spot202	74.3808	47029.2	0.572425	16.7167	1.28299	0.821871	1.96693	0.0996877	1.49089	0.757977	612.579	8.71237	609.092	9.00984	597.108	27.7724	612.579	8.71237
11CAT13 Spot27	472.972	4.05556e+08	1.6336	16.3268	0.946006	0.841836	1.89637	0.0997276	1.64357	0.866689	612.812	9.60806	620.158	8.80119	648.013	20.3391	612.812	9.60806
11CAT13 Spot36	97.7348	108599	0.72991	16.5949	1.13436	0.831465	2.1959	0.100117	1.88021	0.856238	615.094	11.0305	614.425	10.1228	612.879	24.5112	615.094	11.0305
11CAT13 Spot242	212.965	79326.8	9.23083	16.527	0.861116	0.835563	2.15746	0.100199	1.97816	0.916893	615.573	11.6137	616.694	9.97234	621.729	18.597	615.573	11.6137
11CAT13 Spot186	536.255	393343	9.28717	16.3613	0.864872	0.848027	2.31129	0.100673	2.14338	0.92735	618.353	12.6378	623.566	10.7697	643.481	18.5905	618.353	12.6378
11CAT13 Spot273	320.997	147863	2.03607	16.5017	0.87241	0.84319	1.73781	0.100958	1.50295	0.864857	620.022	8.88454	620.904	8.07227	625.039	18.8302	620.022	8.88454
11CAT13 Spot78	70.3383	28334.3	1.52259	16.7551	1.28129	0.832061	3.75773	0.101155	3.53254	0.940073	621.176	20.9193	614.755	17.3306	592.097	27.778	621.176	20.9193
11CAT13 Spot258	116.665	59551.4	3.1399	16.5605	0.850062	0.84635	1.9984	0.101698	1.80859	0.905019	624.351	10.7624	622.644	9.30167	617.364	18.371	624.351	10.7624
11CAT13 Spot169	244.637	213471	1.15679	15.6575	1.87359	0.898601	2.9115	0.102089	2.22857	0.765436	626.637	13.3078	650.979	13.9929	737.254	39.6508	626.637	13.3078
11CAT13 Spot159	89.5416	160547	1.67472	16.4144	0.927442	0.860947	1.58457	0.102539	1.2848	0.810821	629.271	7.70283	630.639	7.44376	636.506	19.9788	629.271	7.70283
11CAT13 Spot197	355.68	1.10077e+07	5.03479	16.2476	0.87148	0.873685	2.48491	0.102999	2.32708	0.936485	631.957	14.0084	637.566	11.7657	658.435	18.6651	631.957	14.0084
11CAT13 Spot286	656.329	208395	2.23973	16.4574	0.97925	0.865049	1.98145	0.103298	1.72256	0.869344	633.705	10.3966	632.875	9.33203	630.869	21.0929	633.705	10.3966
11CAT13 Spot38	233.349	1.208e+06	2.60418	16.1585	0.93827	0.887505	2.01045	0.104054	1.77807	0.884417	638.124	10.8028	645.028	9.59882	670.217	20.0573	638.124	10.8028
11CAT13 Spot207	347.536	266339	1.48802	16.2193	0.971983	0.884202	2.21984	0.104057	1.99573	0.899042	638.143	12.1256	643.25	10.5777	662.135	20.8079	638.143	12.1256
11CAT13 Spot248	115.557	4.37991e+06	2.10196	16.1983	0.97112	0.885672	1.76003	0.104095	1.46786	0.834	638.364	8.92129	644.042	8.39394	664.957	20.8006	638.364	8.92129
11CAT13 Spot182	381.624	189290	4.67619	16.3123	0.873514	0.881213	2.39968	0.1043	2.23504	0.931394	639.559	13.6082	641.638	11.4142	649.876	18.753	639.559	13.6082
11CAT13 Spot184	233.71	85388.6	25.9902	16.1031	0.898455	0.942387	1.87023	0.11011	1.64029	0.877051	673.387	10.4882	674.131	9.21364	677.568	19.2049	673.387	10.4882
11CAT13 Spot116	189.323	97049.9	1.75566	15.89	0.915466	0.955824	2.26648	0.110202	2.07337	0.914796	673.92	13.2673	681.131	11.2473	705.939	19.4558	673.92	13.2673
11CAT13 Spot195	345.548	115570	4.38228	16.2639	0.968308	0.94435	2.47721	0.111441	2.28012	0.920439	681.114	14.7379	675.156	12.2172	656.282	20.7559	681.114	14.7379
11CAT13 Spot210	136.683	68667.5	1.72274	16.1697	0.885008	0.95382	1.74633	0.111906	1.50547	0.862075	683.81	9.76737	680.09	8.65664	668.734	18.9608	683.81	9.76737
11CAT13 Spot263	1176.04	224487	2.36492	15.4366	0.851324	1.03768	2.01475	0.116226	1.82605	0.906341	708.804	12.2569	722.763	10.4182	767.221	17.9322	708.804	12.2569
11CAT13 Spot56	178.212	149954	1.81984	15.5166	1.01011	1.05093	2.54944	0.11832	2.3408	0.918161	720.888	15.9652	729.344	13.2655	756.316	21.2937	720.888	15.9652
11CAT13 Spot142	100.56	65286.9	2.35042	15.6395	0.999606	1.04863	1.81469	0.118996	1.51456	0.834611	724.781	10.3827	728.204	9.43202	739.655	21.1504	724.781	10.3827
11CAT13 Spot89	140.863	176304	1.9281	15.3782	0.915424	1.0995	1.85023	0.122685	1.60791	0.869029	745.997	11.3269	753.111	9.83898	775.192	19.2579	745.997	11.3269
11CAT13 Spot218	482.503	486668	8.14376	15.5605	0.935093	1.10632	2.82499	0.124908	2.66574	0.943628	758.754	19.0815	756.402	15.0673	750.356	19.7299	758.754	19.0815
11CAT13 Spot64	114.175	139032	1.89379	15.4121	0.867687	1.11887	1.90301	0.125121	1.69368	0.890003	759.971	12.1418	762.434	10.2038	770.555	18.2672	759.971	12.1418
11CAT13 Spot40	48.9778	17752.8	2.53526	15.4388	1.25681	1.15479	2.52288	0.129361	2.18755	0.867083	784.217	16.1527	779.501	13.7294	766.919	26.475	784.217	16.1527
11CAT13 Spot15	626.718	1.51414e+06	1.47241	15.2563	0.790288	1.17312	2.28972	0.129861	2.14902	0.938549	787.074	15.9226	788.104	12.5514	791.914	16.5805	787.074	15.9226
11CAT13 Spot313	692.043	212520	2.86111	14.4302	0.979619	1.24474	2.24171	0.130329	2.01634	0.899463	789.74	14.9871	821.028	12.6225	907.632	20.1978	789.74	14.9871
11CAT13 Spot33	144.708	290433	1.8571	14.7972	0.960545	1.27957	1.98557	0.137383	1.73777	0.875199	829.846	13.5312	836.663	11.3174	855.708	19.9583	829.846	13.5312
11CAT13 Spot262	242.073	130804	1.10573	14.5953	0.68137	1.30825	2.18618	0.138546	2.07729	0.95019	836.433	16.2952	849.359	12.5819	884.199	14.088	836.433	16.2952
11CAT13 Spot303	551.342	734328	3.31911	14.2034	0.931413	1.34891	2.02096	0.139016	1.79353	0.887465	839.094	14.1111	867.088	11.7849	940.224	19.0709	839.094	14.1111
11CAT13 Spot114	69.224	68429.7	3.10478	14.213	0.991824	1.44354	2.43096	0.148869	2.21942	0.912983	894.62	18.5393	907.193	14.583	938.799	20.3131	938.799	20.3131
11CAT13 Spot92	170.135	402985	1.97546	14.1812	1.20346	1.49731	2.35329	0.154068	2.02229	0.859347	923.729	17.4038	929.295	14.3276	943.433	24.6452	943.433	24.6452
11CAT13 Spot126	163.17	95677.6	2.02049	14.1133	1.07955	1.53812	1.93716	0.157509	1.60846	0.83032	942.921	14.1095	945.752	11.9205	953.256	22.0896	953.256	22.0896
11CAT13 Spot73	255.284	298904	2.20447	14.0164	0.888499	1.56233	2.54298	0.15889	2.38271	0.936976	950.606	21.0594	955.391	15.7451	967.307	18.1395	967.307	18.1395
11CAT13 Spot11	349.9	511330	4.05483	13.9894	0.992791	1.63083	2.26702	0.165537	2.03807	0.89901	987.476	18.6599	982.178	14.2702	971.245	20.2477	971.245	20.2477
11CAT13 Spot26	251.005	240284	2.79446	13.9883	0.966901	1.56092	1.82877	0.158428	1.55225	0.848798	948.035	13.685	954.831	11.3185	971.43	19.7232	971.43	19.7232
11CAT13 Spot166	543.94	244723	2.06546	13.8713	1.00229	1.56898	2.26158	0.157914	2.02736	0.896432	945.176	17.8236	958.021	14.0258	988.506	20.3851	988.506	20.3851
11CAT13 Spot65	183.894	193973	1.59223	13.8421	0.946462	1.67599	1.97947	0.16833	1.73854	0.878284	1002.9	16.1473	999.462	12.5889	992.812	19.2416	992.812	19.2416
11CAT13 Spot312	200.903	348072	1.58914	13.8293	0.901727	1.53329	1.64488	0.153855	1.37569	0.836346	922.535	11.8249	943.817	10.1092	994.693	18.3157	994.693	18.3157
11CAT13 Spot129	80.1662	126466	2.48215	13.7441	0.954099	1.65347	4.53966	0.164892	4.43827	0.977665	983.908	40.4997	990.879	28.731	1007.21	19.3361	1007.21	19.3361
11CAT13 Spot21	179.044	161739	2.84744	13.717	0.874786	1.68731	2.04308	0.167936	1.84633	0.903698	1000.73	17.114	1003.75	13.0262	1011.21	17.7275	1011.21	17.7275
11CAT13 Spot231	105.379	222132	1.24378	13.712	1.13247	1.73152	2.28645	0.172272	1.98629	0.868724	1024.62	18.8169	1020.32	14.7179	1011.96	22.9574	1011.96	22.9574
11CAT13 Spot147	106.111	151696	1.75111	13.6732	1.00348	1.74088	4.48963	0.172714	4.37605	0.974701	1027.05	41.5472	1023.79	28.9626	1017.7	20.3258	1017.7	20.3258
11CAT13 Spot12	70.4494	206682	1.56846	13.6349	0.900108	1.68905	2.53924	0.167102	2.37435	0.935064	996.124	21.9148	1004.41	16.1962	1023.38	18.2149	1023.38	18.2149
11CAT13 Spot234	364.861	161521	1.10421	13.6062	1.0499	1.72132	2.65996	0.169936	2.44399	0.918808	1011.76	22.8846	1016.52	17.0855	1027.65	21.2524	1027.65	21.2524
11CAT13 Spot268	154.637	142706	1.57417	13.6	0.796865	1.68677	2.34068	0.166449	2.20086	0.940266	992.516	20.2455	1003.54	14.922	1028.57	16.1123	1028.57	16.1123
11CAT13 Spot213	186.167	180698	1.66049	13.583	0.96279	1.74	2.00576	0.171488	1.75958	0.877262	1020.3	16.6044	1023.46	12.9339	1031.08	19.4802	1031.08	19.4802
11CAT13 Spot45	161.15	108784	0.472218	13.5728	1.08869	1.5649	2.71238	0.154115	2.48431	0.915912	923.987	21.3855	956.411	16.805	1032.61	22.0202	1032.61	22.0202
11CAT13 Spot34	453.299	311204	1.80697	13.5654	0.736328	1.7683	2.22159	0.174051	2.09602	0.943476	1034.39	20.0311	1033.9	14.4101	1033.71	14.8962	1033.71	14.8962
11CAT13 Spot235	217.755	170001	1.26492	13.5002	1.13401	1.66562	2.40322	0.163157	2.11884	0.881668	974.298	19.1595	995.52	15.2487	1043.43	22.8985	1043.43	22.8985
11CAT13 Spot250	191.04	297541	5.72481	13.3984	0.848247	1.82533	2.0396	0.177452	1.85485	0.909416	1053.04	18.0204	1054.6	13.3805	1058.73	17.0929	1058.73	17.0929
11CAT13 Spot58	69.5672	664185	0.776948	13.3142	0.86413	1.78676	2.11856	0.172612	1.93432	0.913033	1026.48	18.3554	1040.64	13.7932	1071.4	17.3529	1071.4	17.3529
11CAT13 Spot165	153.645	117590	11.8532	12.75	1.52362	1.91133	1.95009	0.176821	1.21714	0.624147	1049.58	11.7892	1085.05	13.0003	1157.81	30.2411	1157.81	30.2411
11CAT13 Spot220	322.173	4.78329e+06	3.74419	10.306	0.851528	3.52026	2.1288	0.26324	1.95108	0.916514	1506.4	26.2097	1531.78	16.8351	1567.8	15.9556	1567.8	15.9556
11CAT13 Spot109	241.243	223167	1.01607	9.34178	0.777281	4.30698	2.36852	0.291937	2.23735	0.944618	1651.2	32.5914	1694.7	19.5203	1749.71	14.2294	1749.71	14.2294
11CAT13 Spot47	79.3182	118416	1.13141	9.27885	0.772589	4.60452	2.32841	0.310003	2.1965	0.943347	1740.72	33.5079	1750.09	19.4263	1762.07	14.1235	1762.07	14.1235
11CAT13 Spot178	83.2548	58725.9	1.3835	9.02612	0.774631	4.47047	2.30266	0.29278	2.16845	0.941717	1655.41	31.6584	1725.51	19.1091	1812.39	14.0714	1812.39	14.0714
11CAT13 Spot83	414.029	779084	3.0541	8.97208	1.07917	4.29046	3.38876	0.279309	3.21233	0.947938	1587.88	45.2122	1691.53	27.912	1823.29	19.5784	1823.29	19.5784
11CAT13 Spot145	102.746	128536	1.44197	8.64168	0.769927	5.41987	1.84523	0.339841	1.67693	0.908791	1885.9	27.4194	1888	15.819	1891.08	13.8533	1891.08	13.8533
11CAT13 Spot37	47.9292	93805.1	1.32803	8.55465	0.790474	5.45429	1.71758	0.338554	1.52487	0.887801	1879.71	24.8625	1893.43	14.7389	1909.27	14.1942	1909.27	14.1942
11CAT13 Spot111	82.8464	93607.7	1.95701	8.41664	1.12329	5.25412	2.10267	0.320868	1.77748	0.845346	1793.97	27.8352	1861.44	17.9382	1938.42	20.0991	1938.42	20.0991
11CAT13 Spot294	129.751	300245	1.11419	8.28657	0.660842	5.86049	1.73805	0.352368	1.60752	0.924896	1945.9	27.0009	1955.4	15.0766	1966.24	11.7848	1966.24	11.7848
11CAT13 Spot253	534.886	828981	1.16995	8.24884	0.705558	5.31607	3.0834	0.318179	3.00159	0.973468	1780.83	46.7061	1871.45	26.3573	1974.38	12.5705	1974.38	12.5705
11CAT13 Spot122	173.486	466519	2.58067	8.23285	0.874394	5.70051	1.61681	0.340527	1.35996	0.841141	1889.2	22.2701	1931.44	13.9676	1977.83	15.5728	1977.83	15.5728
11CAT13 Spot85	530.296	566568	2.45321	8.22097	1.02896	5.69695	3.10366	0.339823	2.92813	0.943444	1885.82	47.8765	1930.9	26.8145	1980.41	18.3206	1980.41	18.3206
11CAT13 Spot39	485.823	521511	5.79757	8.14406	0.732542	5.85276	2.25265	0.345851	2.13021	0.945648	1914.76	35.2889	1954.26	19.5377	1997.13	13.0167	1997.13	13.0167
11CAT13 Spot179	342.231	748663	5.05054	8.02988	0.815562	6.28429	2.31329	0.366145	2.16476	0.935791	2011.24	37.4015	2016.27	20.2669	2022.18	14.4523	2022.18	14.4523
11CAT13 Spot259	727.2	522016	2.18846	7.69143	0.801399	5.38703	2.34873	0.300639	2.20778	0.939989	1694.47	32.8977	1882.79	20.1173	2098.15	14.0768	2098.15	14.0768
11CAT13 Spot70	502.153	1.26735e+06	3.74266	7.56575	0.889738	7.09563	2.03957	0.389521	1.83527	0.899831	2120.61	33.1656	2123.5	18.1533	2127.04	15.5806	2127.04	15.5806
11CAT13 Spot198	196.393	373401	1.32688	5.68024	0.680118	11.9864	1.99236	0.494017	1.87268	0.939931	2588.03	39.9184	2603.34	18.6744	2615.98	11.321	2615.98	11.321
11CAT13 Spot283	580.229	396928	1.79017	5.67818	0.864544	9.95206	2.25601	0.410025	2.08378	0.923658	2215.03	39.0624	2430.35	20.8185	2616.59	14.3901	2616.59	14.3901
11CAT13 Spot42	315.077	3.87824e+06	2.48085	5.64994	0.98053	11.947	1.97497	0.48977	1.71437	0.868049	2569.68	36.333	2600.26	18.5067	2624.88	16.3076	2624.88	16.3076
11CAT13 Spot135	364.832	1.82944e+07	2.38481	5.61876	0.888602	12.0738	2.22167	0.492234	2.03623	0.916528	2580.34	43.2998	2610.15	20.8359	2634.08	14.7625	2634.08	14.7625
11CAT13 Spot3	210.11	677920	2.31871	5.53789	0.76196	12.1175	1.89858	0.486908	1.73898	0.915933	2557.28	36.7095	2613.55	17.8101	2658.14	12.6325	2658.14	12.6325
11CAT13 Spot30	601.727	2.25662e+06	2.5219	3.6271	0.968961	24.5577	2.35403	0.646301	2.14537	0.911357	3213.74	54.2944	3290.79	22.9711	3338.74	15.1548	3338.74	15.1548
11 CAT 13 Nu Plasma
11CAT13 Spot 71	641.982	15003.3	1.0478	19.489	13.8646	0.0276518	14.3795	0.00390851	3.81373	0.265219	25.1467	0.95716	27.696	3.92875	254.821	320.116	25.1467	0.95716
11CAT13 Spot 18	908.361	12933.4	0.969576	20.969	7.60653	0.0264184	8.71397	0.00401774	4.25136	0.487878	25.8481	1.0967	26.4765	2.27734	83.8695	180.673	25.8481	1.0967
11CAT13 Spot 11	702.951	11267	0.850346	22.8217	4.83192	0.0433754	5.3937	0.00717943	2.39677	0.444365	46.1162	1.10135	43.1142	2.27677	-120.888	119.265	46.1162	1.10135
11CAT13 Spot 34	227.873	2021.8	1.1311	25.8058	14.9611	0.0385523	15.3092	0.00721548	3.24638	0.212053	46.347	1.4992	38.4096	5.77045	-433.539	394.662	46.347	1.4992
11CAT13 Spot 27	568.019	8041.27	0.758944	22.2017	6.11773	0.0451507	6.30137	0.00727026	1.51015	0.239654	46.6976	0.702654	44.8404	2.76409	-53.3842	149.091	46.6976	0.702654
11CAT13 Spot 7	661.633	7850.89	0.53221	21.9991	8.08508	0.0457688	8.38666	0.00730254	2.22881	0.265756	46.9042	1.04161	45.4407	3.72696	-31.1091	196.29	46.9042	1.04161
11CAT13 Spot 66	136.427	2585.71	1.65712	22.5022	38.5033	0.0447552	39.025	0.00730411	6.35991	0.16297	46.9142	2.97287	44.4561	16.9762	-86.2246	975.196	46.9142	2.97287
11CAT13 Spot 47	545.974	9698.41	0.765041	21.9759	11.2659	0.0458573	11.3269	0.00730893	1.17356	0.103609	46.9451	0.548929	45.5266	5.0429	-28.5492	273.759	46.9451	0.548929
11CAT13 Spot 25	574.081	9075.16	0.981467	22.3724	6.50216	0.0453797	6.72478	0.00736332	1.71599	0.255174	47.2931	0.808573	45.0629	2.96413	-72.069	159.045	47.2931	0.808573
11CAT13 Spot 32	378.714	4511.07	0.956878	21.492	10.4246	0.0473587	10.5474	0.007382	1.60468	0.152139	47.4127	0.75803	46.9833	4.84266	25.0995	250.659	47.4127	0.75803
11CAT13 Spot 22	864.777	11192.5	0.871383	21.3188	5.78084	0.0478467	6.2942	0.00739798	2.48972	0.395559	47.5149	1.17864	47.4562	2.91827	44.4681	138.25	47.5149	1.17864
11CAT13 Spot 13	223.208	4886.44	1.56628	21.1853	22.978	0.0485439	23.5779	0.0074588	5.28487	0.224145	47.9041	2.52229	48.1317	11.0841	59.5053	553.95	47.9041	2.52229
11CAT13 Spot 16	332.073	9236.46	1.08124	20.8528	10.2346	0.0494077	10.7176	0.00747236	3.18122	0.296823	47.9909	1.52103	48.9677	5.12366	97.0327	242.749	47.9909	1.52103
11CAT13 Spot 21	195.038	1609.32	1.09848	22.6969	23.7011	0.0454478	24.577	0.00748133	6.50281	0.26459	48.0482	3.11287	45.129	10.8489	-107.383	590.161	48.0482	3.11287
11CAT13 Spot 77	213.613	3400.66	1.04572	24.4405	25.1519	0.0424953	25.4185	0.0075327	3.67205	0.144464	48.3769	1.76977	42.2574	10.5211	-292.832	650.42	48.3769	1.76977
11CAT13 Spot 60	421.108	8957.09	1.23129	20.3814	12.6149	0.0510385	12.7634	0.00754452	1.94114	0.152086	48.4525	0.937005	50.5445	6.29334	150.923	296.605	48.4525	0.937005
11CAT13 Spot 82	273.555	541.88	1.54393	18.2769	13.1704	0.0571482	13.5513	0.00757535	3.19035	0.235428	48.6498	1.54626	56.4298	7.4385	400.532	296.212	48.6498	1.54626
11CAT13 Spot 65	218.974	4499.55	0.960659	23.1591	27.5534	0.0454449	28.1654	0.00763316	5.83939	0.207325	49.0197	2.8516	45.1262	12.4323	-157.22	695.728	49.0197	2.8516
11CAT13 Spot 84	289.964	8966.88	0.99495	20.3017	15.4268	0.0521874	15.7037	0.00768417	2.93612	0.18697	49.346	1.44333	51.6538	7.90886	160.099	362.718	49.346	1.44333
11CAT13 Spot 45	296.457	3363.64	1.18519	24.8098	17.3729	0.0429671	17.6454	0.00773139	3.08899	0.17506	49.648	1.52773	42.7167	7.38131	-331.251	449.593	49.648	1.52773
11CAT13 Spot 39	353.959	6186.83	1.38711	18.7638	2.77727	0.287958	8.03099	0.0391875	7.53548	0.938301	247.795	18.3183	256.951	18.2336	341.339	62.8633	247.795	18.3183
11CAT13 Spot 73	309.214	43135.3	1.05149	19.0391	1.49999	0.293663	2.11265	0.0405504	1.48772	0.704197	256.244	3.73742	261.439	4.86955	308.239	34.16	256.244	3.73742
11CAT13 Spot 37	86.8796	5694.04	0.684589	19.359	13.7195	0.301094	15.6593	0.042275	7.54909	0.482083	266.919	19.7385	267.254	36.8117	270.171	315.855	266.919	19.7385
11CAT13 Spot 98	164.766	14920.4	1.6721	18.5791	2.15143	0.330336	4.64618	0.0445121	4.11805	0.88633	280.741	11.3129	289.822	11.7149	363.671	48.4974	280.741	11.3129
11CAT13 Spot 55	194.774	9736.01	1.33684	18.4922	3.32727	0.339126	4.03762	0.045483	2.28728	0.566491	286.73	6.4146	296.51	10.3827	374.227	74.8858	286.73	6.4146
11CAT13 Spot 90	307.959	21870.5	2.50268	19.1029	3.92713	0.333323	5.70639	0.0461809	4.14012	0.725523	291.032	11.7811	292.099	14.4861	300.668	89.5836	291.032	11.7811
11CAT13 Spot 100	169.171	13557.3	1.49802	18.8869	5.8501	0.3408	6.88447	0.046683	3.62936	0.527181	294.125	10.435	297.778	17.7697	326.495	132.867	294.125	10.435
11CAT13 Spot 81	194.684	2206.52	1.01148	18.1903	5.52656	0.356656	5.63499	0.0470532	1.10012	0.195231	296.404	3.18699	309.715	15.043	411.159	123.661	296.404	3.18699
11CAT13 Spot 99	278.006	10069.3	1.7071	18.6745	3.49332	0.361152	4.03138	0.0489146	2.01216	0.499124	307.854	6.04894	313.074	10.8614	352.112	78.956	307.854	6.04894
11CAT13 Spot 67	181.697	37625.9	1.65699	18.3742	3.14787	0.37261	3.46128	0.0496548	1.43924	0.415812	312.402	4.38901	321.586	9.54086	388.624	70.7017	312.402	4.38901
11CAT13 Spot 96	231.377	16867.2	1.77	18.9593	3.13057	0.362945	3.34159	0.0499069	1.16868	0.349737	313.95	3.58115	314.411	9.03561	317.808	71.1723	313.95	3.58115
11CAT13 Spot 23	184.814	7569.42	1.50598	18.8197	3.10052	0.371711	3.39977	0.0507361	1.39472	0.41024	319.039	4.3414	320.921	9.35481	334.62	70.2874	319.039	4.3414
11CAT13 Spot 4	186.243	13387.3	1.20864	19.3205	2.84369	0.363314	3.38833	0.0509096	1.84233	0.54373	320.104	5.75336	314.686	9.16881	274.727	65.1632	320.104	5.75336
11CAT13 Spot 78	279.446	45039.6	1.56772	19.0834	3.32711	0.368297	4.58072	0.0509746	3.14855	0.687348	320.502	9.84443	318.391	12.52	302.992	75.8556	320.502	9.84443
11CAT13 Spot 46	136.251	173701	1.68523	18.3671	7.45052	0.383005	9.2864	0.0510205	5.54319	0.596915	320.784	17.3465	329.247	26.1188	389.485	167.432	320.784	17.3465
11CAT13 Spot 40	145.441	19888.6	1.83532	18.9316	4.68951	0.372267	4.83323	0.0511139	1.1699	0.242053	321.357	3.66738	321.332	13.314	321.174	106.594	321.357	3.66738
11CAT13 Spot 31	359.768	46635.2	1.24937	18.9345	2.22311	0.37255	3.09239	0.0511607	2.14958	0.695119	321.644	6.74434	321.541	8.52297	320.822	50.5183	321.644	6.74434
11CAT13 Spot 83	182.131	29679.8	1.8147	19.3805	3.36617	0.364533	3.60933	0.051239	1.30237	0.360836	322.124	4.09217	315.593	9.79089	267.623	77.2244	322.124	4.09217
11CAT13 Spot 38	343.889	70551.8	3.09645	18.7761	2.40701	0.376278	2.65518	0.0512403	1.12083	0.422129	322.132	3.52182	324.296	7.37112	339.882	54.5014	322.132	3.52182
11CAT13 Spot 53	358.787	32490.8	2.14226	19.0073	1.5127	0.373087	1.75355	0.0514314	0.88695	0.505803	323.303	2.79682	321.939	4.83797	312.056	34.4158	323.303	2.79682
11CAT13 Spot 70	324.63	30261.9	5.02102	18.6092	2.564	0.384328	2.78595	0.0518715	1.0897	0.391141	326.001	3.46411	330.218	7.85372	360.02	57.8503	326.001	3.46411
11CAT13 Spot 61	252.182	26760.6	1.99173	18.7084	2.78555	0.384355	3.09195	0.0521518	1.34197	0.434022	327.719	4.28798	330.238	8.71683	348.002	62.9764	327.719	4.28798
11CAT13 Spot 10	147.59	23487.8	2.41223	19.3531	4.47939	0.371602	4.91437	0.0521587	2.02141	0.411326	327.761	6.45978	320.84	13.5199	270.873	102.739	327.761	6.45978
11CAT13 Spot 54	451.16	10270.3	3.53391	17.5599	1.48503	0.411229	6.05473	0.0523728	5.86979	0.969455	329.073	18.8312	349.76	17.9166	489.492	32.7518	329.073	18.8312
11CAT13 Spot 2	411.919	102348	1.1467	18.1302	1.875	0.490423	3.00076	0.0644871	2.34285	0.780752	402.856	9.14945	405.199	10.0262	418.551	41.8792	402.856	9.14945
11CAT13 Spot 14	220.254	10597.1	2.33988	17.9472	1.79204	0.501876	3.7753	0.065327	3.32287	0.88016	407.941	13.1353	412.971	12.8105	441.161	39.8679	407.941	13.1353
11CAT13 Spot 69	549.927	21532	1.77883	17.7351	0.61577	0.549799	0.798379	0.0707191	0.50817	0.636502	440.487	2.16366	444.865	2.87587	467.571	13.6148	440.487	2.16366
11CAT13 Spot 59	247.983	8225.88	0.521612	16.214	0.933862	0.642736	6.53968	0.0755826	6.47266	0.989752	469.702	29.3212	503.998	25.9864	662.838	19.9884	469.702	29.3212
11CAT13 Spot 52	291.543	28959	1.31038	17.7156	1.12713	0.607846	2.59805	0.0780997	2.34081	0.90099	484.77	10.9314	482.201	9.97332	469.984	24.9707	484.77	10.9314
11CAT13 Spot 79	148.989	127694	2.20867	17.2878	4.21939	0.63777	4.5881	0.0799655	1.80206	0.392768	495.917	8.6016	500.925	18.1435	523.849	92.5735	495.917	8.6016
11CAT13 Spot 24	306.035	40549	2.33898	17.4334	1.49431	0.638543	7.08252	0.0807367	6.92309	0.977489	500.518	33.3406	501.404	28.0324	505.445	32.8878	500.518	33.3406
11CAT13 Spot 8	229.668	14329.7	0.775563	16.6646	1.34504	0.671627	2.53542	0.0811751	2.14924	0.847686	503.133	10.4023	521.701	10.3439	603.816	29.1252	503.133	10.4023
11CAT13 Spot 15	459.768	5533.52	6.14443	16.2023	0.962968	0.698664	4.342	0.0820999	4.23387	0.975097	508.645	20.7077	537.993	18.1354	664.434	20.6262	508.645	20.7077
11CAT13 Spot 17	849.364	38989.7	2.5295	16.482	0.624911	0.733162	1.57341	0.0876414	1.44399	0.917745	541.573	7.50077	558.407	6.75832	627.61	13.4885	541.573	7.50077
11CAT13 Spot 51	69.147	25451.5	1.98269	16.8234	5.48021	0.724562	5.62553	0.0884075	1.27037	0.225823	546.112	6.65191	553.357	24.0033	583.263	119.062	546.112	6.65191
11CAT13 Spot 9	258.149	49713.8	2.17098	16.853	1.24391	0.78479	2.15059	0.0959244	1.75435	0.815753	590.48	9.89883	588.212	9.60213	579.478	27.026	590.48	9.89883
11CAT13 Spot 86	95.5407	14333.9	0.507959	16.6053	3.04997	0.804435	3.27248	0.0968803	1.18609	0.362445	596.1	6.75326	599.327	14.8145	611.535	65.9214	596.1	6.75326
11CAT13 Spot 44	262.899	7764.19	2.52043	15.4311	0.974092	0.903414	3.36153	0.101107	3.2173	0.957094	620.894	19.0442	653.55	16.2016	767.968	20.5156	620.894	19.0442
11CAT13 Spot 95	151.924	49276.8	1.0159	16.4099	1.73104	0.867982	2.02897	0.103303	1.0584	0.521645	633.739	6.38835	634.471	9.57319	637.101	37.258	633.739	6.38835
11CAT13 Spot 72	371.95	15939.5	2.42552	15.947	0.756271	0.904407	2.93357	0.104602	2.83441	0.966199	641.323	17.3028	654.08	14.1468	698.342	16.1213	641.323	17.3028
11CAT13 Spot 80	103.683	33903.8	2.1694	15.7807	3.60965	0.944592	8.04387	0.108111	7.18848	0.893659	661.765	45.2113	675.283	39.6946	720.609	76.6114	661.765	45.2113
11CAT13 Spot 97	230.889	66953.2	78.545	15.3776	0.718988	1.10543	7.18753	0.123287	7.15148	0.994984	749.455	50.5999	755.973	38.3359	775.281	15.1246	749.455	50.5999
11CAT13 Spot 56	555.033	32825.1	1.76526	15.0104	0.366982	1.15505	3.09662	0.125746	3.0748	0.992953	763.549	22.1406	779.627	16.8539	825.934	7.65012	763.549	22.1406
11CAT13 Spot 92	329.657	69513.1	1.21422	14.8999	0.625103	1.29204	1.53003	0.139624	1.39651	0.912733	842.533	11.0296	842.203	8.75779	841.352	13.0046	842.533	11.0296
11CAT13 Spot 76	164.532	123868	1.20365	14.6955	1.33987	1.39085	3.9882	0.148239	3.75639	0.941877	891.087	31.2625	885.059	23.562	870.001	27.7451	891.087	31.2625
11CAT13 Spot 33	168.731	73281.8	1.25412	14.1666	1.2227	1.46364	6.28846	0.150383	6.16844	0.980915	903.111	51.9828	915.511	37.9519	945.521	25.0226	945.521	25.0226
11CAT13 Spot 91	83.9152	4991.7	1.31544	14.1295	3.30491	1.46484	4.32177	0.150112	2.78482	0.644371	901.59	23.4311	916.004	26.0848	950.885	67.6222	950.885	67.6222
11CAT13 Spot 15	152.135	20303	1.30822	13.8192	0.922664	1.6047	3.42224	0.160833	3.29551	0.96297	961.406	29.4341	972.045	21.4112	996.172	18.7307	996.172	18.7307
11CAT13 Spot 41	148.538	15705.7	0.740848	13.7609	1.0258	1.63063	2.38543	0.162743	2.15361	0.902817	972.003	19.4314	982.103	15.015	1004.73	20.805	1004.73	20.805
11CAT13 Spot 85	204.897	274051	1.75301	13.7319	0.849493	1.72111	3.34018	0.171411	3.23035	0.967119	1019.88	30.472	1016.44	21.455	1009.02	17.2197	1009.02	17.2197
11CAT13 Spot 19	77.3073	55256.2	2.621	13.6051	2.0462	1.71543	2.53048	0.169268	1.48876	0.58833	1008.08	13.8933	1014.32	16.2332	1027.8	41.3833	1027.8	41.3833
11CAT13 Spot 5	131.636	29359.1	1.42473	13.572	0.938399	1.78731	1.92147	0.175932	1.67674	0.872634	1044.71	16.1714	1040.85	12.5112	1032.72	18.982	1032.72	18.982
11CAT13 Spot 28	141.223	65465.6	1.96972	13.3333	1.57589	1.83745	2.55552	0.177685	2.01178	0.787229	1054.32	19.5669	1058.95	16.8049	1068.52	31.6763	1068.52	31.6763
11CAT13 Spot 12	385.776	109861	1.20919	8.12601	0.174936	5.86109	3.22036	0.345426	3.21561	0.998523	1912.72	53.2213	1955.49	27.9402	2001.07	3.10544	2001.07	3.10544
11CAT13 Spot 1	223.579	56414.3	3.76523	7.36326	0.880615	7.33248	2.29242	0.39158	2.11653	0.923274	2130.15	38.3936	2152.78	20.4861	2174.42	15.3377	2174.42	15.3377
11CAT13 Spot 26	333.881	35996.4	1.22217	6.13089	0.351999	9.42003	1.75799	0.418866	1.72239	0.979749	2255.33	32.7783	2379.78	16.1386	2488.13	5.93303	2488.13	5.93303
11CAT13 Spot 63	193.835	30395.2	2.03302	6.02067	0.342379	9.71208	3.31966	0.424088	3.30196	0.994667	2279.01	63.3903	2407.85	30.5699	2518.65	5.75347	2518.65	5.75347
11CAT13 Spot 64	427.606	203209	1.72044	5.7762	0.0642535	10.7702	0.883552	0.451194	0.881212	0.997352	2400.56	17.6619	2503.5	8.20939	2588.07	1.07239	2588.07	1.07239
11CAT13 Spot 6	239.796	140243	1.01593	5.53658	0.347294	11.7543	1.70138	0.471995	1.66555	0.978945	2492.3	34.428	2585.03	15.9223	2658.53	5.75748	2658.53	5.75748
Notes:
1. All uncertainties are reported at the 1-sigma level, and include only measurement errors.
2. U concentration and U/Th are calibrated relative to Sri Lanka reference zircon and are accurate to ~10%.
3. Common Pb correction is from measured 204Pb with common Pb composition interpreted from Stacey and Kramers (1975)
4. Common Pb composition assigned uncertainties of 1.5 for 206Pb/204Pb, 0.3 for 207Pb/204Pb, and 2.0 for 208Pb/204Pb.
5. U decay constants and composition as follows: 238U = 9.8485 x 10-10, 235U = 1.55125 x 10-10, 238U/235U = 137.88.
6. NA = Not Apllicable (negative ratio)
